# Supplementary material for: Plant-Wide Target Metabolomics Provides a Novel Interpretation of the Changes in Chemical Components during Dendrobium officinale Traditional Processing
Source: MDPI journal article supplement (doi:10.3390/antiox12111995), 2023-11-12
Supplement: s1 [file s1]

# Supplementary data

## Plant-Wide Target Metabolomics Provides a Novel interpretation of the Changes in Chemical Components during *Dendrobium* *officinale* traditional Processing

Pengfei Liu <sup>†</sup>, Bei Fan <sup>†</sup>, Yuwen Mu <sup>†</sup>, Litao Tong, Cong Lu, Long Li, Jiameng Liu, Jing Sun <sup>\*</sup> and  
Fengzhong Wang <sup>\*</sup>

Institute of Food Science and Technology, Chinese Academy of Agricultural Sciences, Key  
Laboratory of Agro-Products Processing, Ministry of Agriculture and Rural Affairs, Beijing  
100193, China; liupengfei0424@zidd.ac.cn (P.L.); fanbei@caas.cn (B.F.); muyw@gsagr.cn  
(Y.M.); tonglitao@caas.cn (L.T.); lucong@caas.cn (C.L.); lilong02@caas.cn (L.L.);  
liujiameng@caas.cn (J.L.)

<sup>\*</sup> Correspondence: sunjing01@caas.cn (J.S.); wangfengzhong@caas.cn (F.W.);  
Tel.: +86-10-62810295 (J.S.); +86-10-62817417 (F.W.)

<sup>†</sup> These authors contributed equally to this work.

| No.               | Content                                                                                                                                                                                                                                                                                                                                                                                                                                                                                                                                                         |
|-------------------|-----------------------------------------------------------------------------------------------------------------------------------------------------------------------------------------------------------------------------------------------------------------------------------------------------------------------------------------------------------------------------------------------------------------------------------------------------------------------------------------------------------------------------------------------------------------|
| <b>Figure S1.</b> | Scores plot generated from OPLS-DA model in each group. FA1 vs. FB2 groups (A), FB2 vs. FC3 group (B), FC3 vs. FD4 group (C), and FD4 vs. FE5 group (D).                                                                                                                                                                                                                                                                                                                                                                                                        |
| <b>Figure S2.</b> | Chart generated from 200 times permutation test in each group. FA1 vs. FB2 groups (A), the FB2 vs. FC3 groups (B), the FC3 vs. FD4 group (C). and the FD4 vs. FE5 group (D).                                                                                                                                                                                                                                                                                                                                                                                    |
| <b>Figure S3.</b> | HCA map of differential components of in FA1 vs. FE5 group. Differences in phenolic acids (A), flavonoids (B), amino acids and their derivatives (C), and differences in lipids (D).                                                                                                                                                                                                                                                                                                                                                                            |
| <b>Figure S4.</b> | KEGG pathway analysis of differential chemical compositions for four Class (phenolic acids, flavonoids, amino acids and their derivatives, lipids). KEGG pathway for amino acids and their derivatives (A), the lipids (B), the phenolic acids (C), the flavonoids (D). In the plot, each bubble (which represents a metabolic pathway) and abscissa indicate the size of the factors affecting the pathway (bigger bubbles represent bigger impacts). Bubble color indicates the p-value of the enrichment analysis. Lighter colors indicate lower enrichment. |
| <b>Table S1</b>   | Identification results of all chemical compositions in DO                                                                                                                                                                                                                                                                                                                                                                                                                                                                                                       |

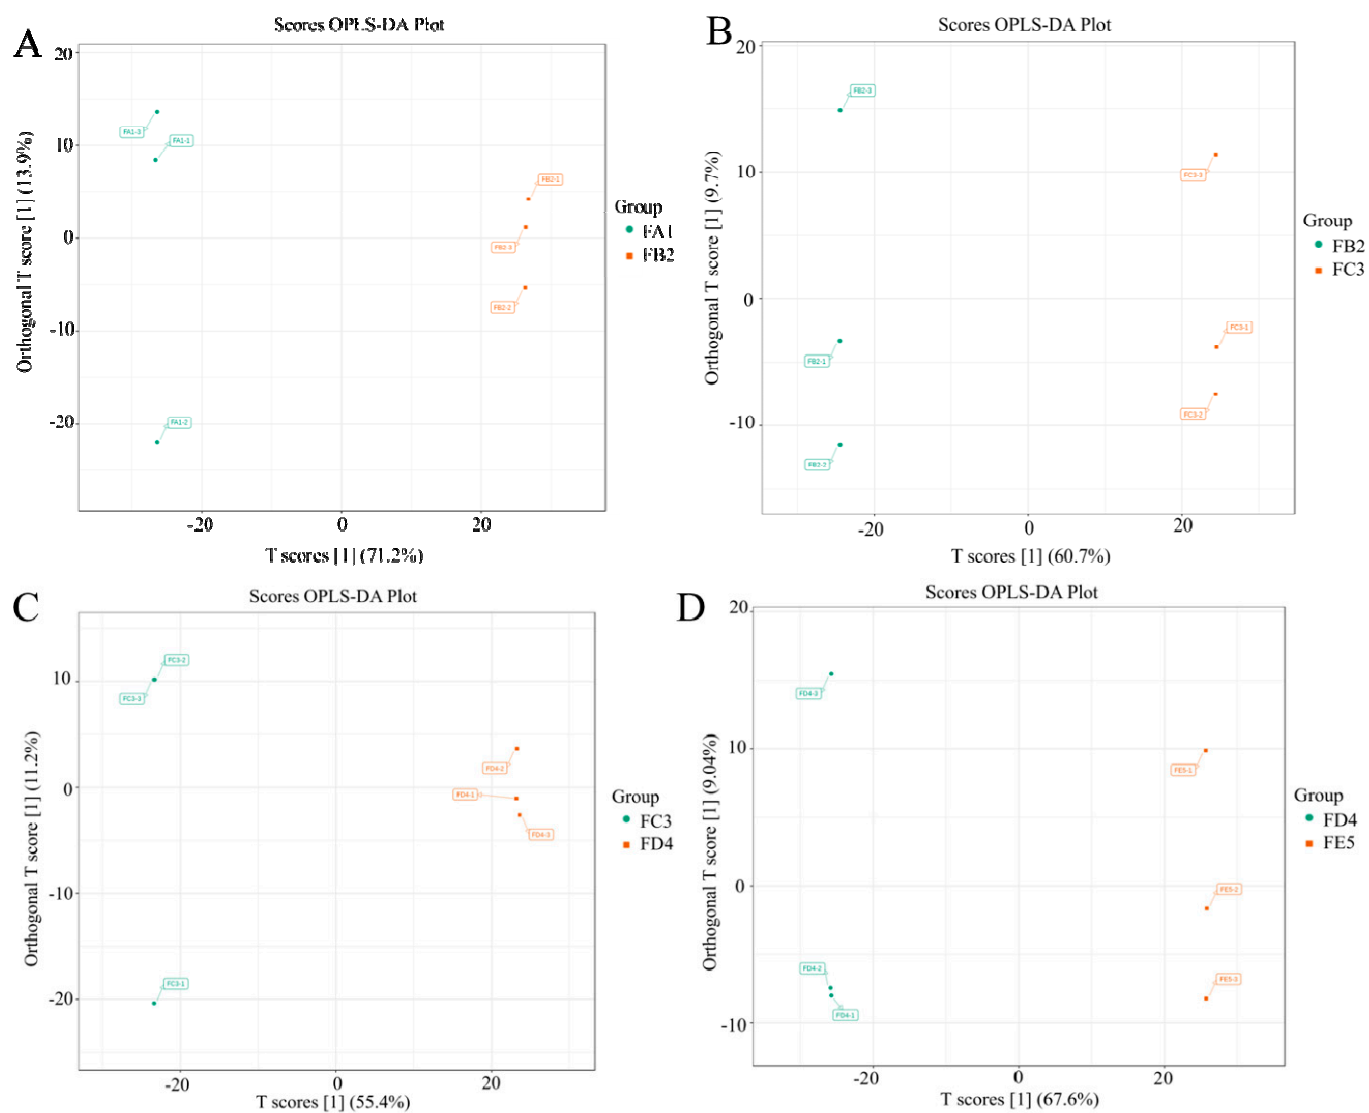

**Figure S1.** Scores plot generated from OPLS-DA model in each group. FA1 vs. FB2 groups (A), FB2 vs. FC3 group (B), FC3 vs. FD4 group (C), and FD4 vs. FE5 group (D).

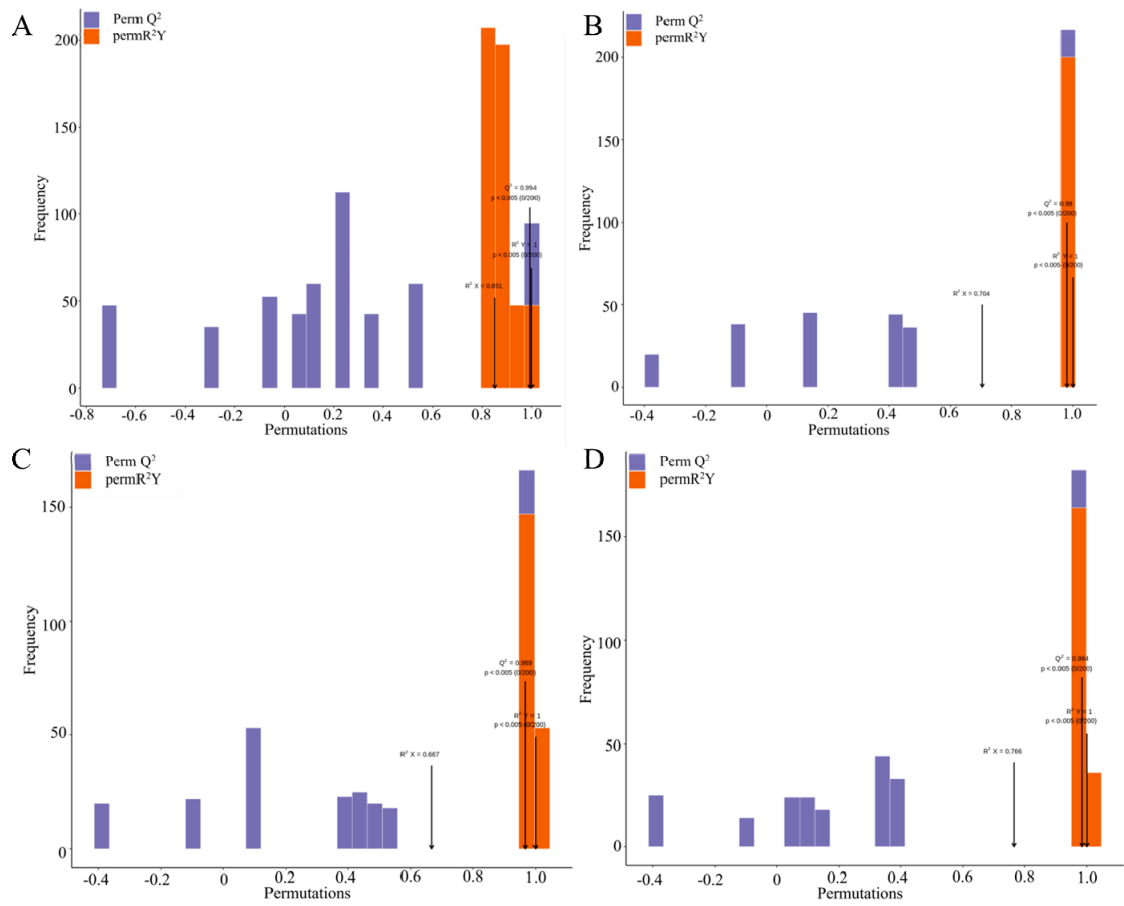

**Figure S2.** Chart generated from 200 times permutation test in each group. FA1 vs. FB2 group (A), FB2 vs. FC3 group (B), FC3 vs. FD4 group (C), and FD4 vs. FE5 group (D).



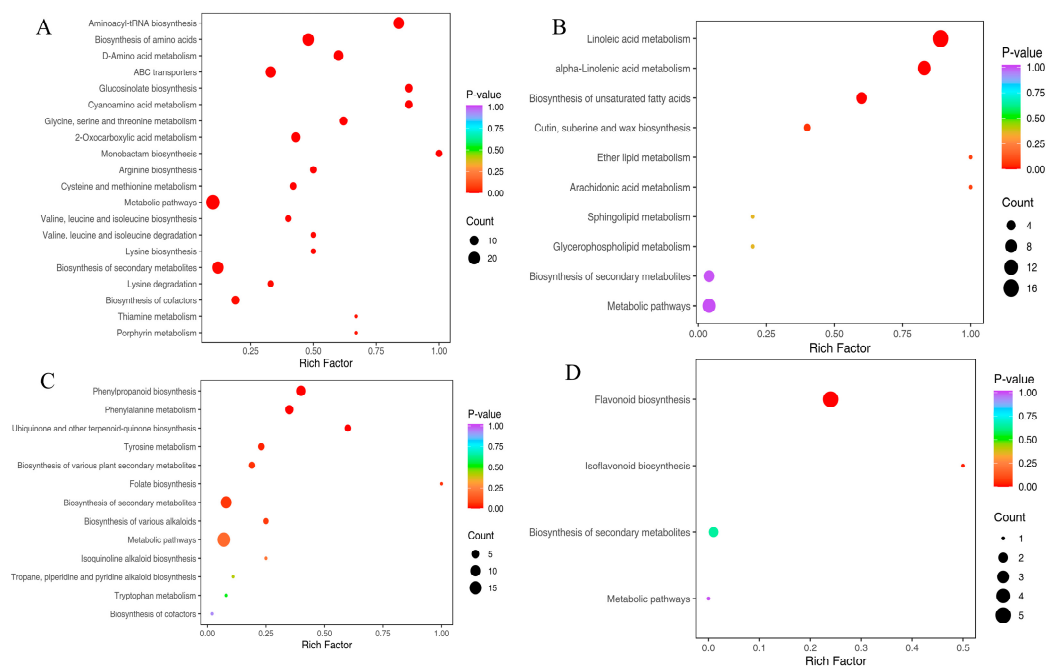

**Figure S4.** KEGG pathway analysis of differential chemical compositions for four Class (phenolic acids, flavonoids, amino acids and their derivatives, lipids). KEGG pathway for amino acids and their derivatives (A), the lipids (B), the phenolic acids (C), the flavonoids (D). In the plot, each bubble (which represents a metabolic pathway) and abscissa indicate the size of the factors affecting the pathway (bigger bubbles represent bigger impacts). Bubble color indicates the p-value of the enrichment analysis. Lighter colors indicate lower enrichment.

Table S1 Identification results of all chemical compositions in DO

| Number | Compounds                       | Formula                                                       | Ionization model   | Type                        | Peak area |         |         |         |         |
|--------|---------------------------------|---------------------------------------------------------------|--------------------|-----------------------------|-----------|---------|---------|---------|---------|
|        |                                 |                                                               |                    |                             | FA1       | FB2     | FC3     | FD4     | FE5     |
| 1      | L- $\gamma$ -Glutamyl-L-leucine | C <sub>11</sub> H <sub>20</sub> N <sub>2</sub> O <sub>5</sub> | [M+H] <sup>+</sup> | Amino acids and derivatives | 605421    | 248228  | 267792  | 386586  | 143048  |
| 2      | L-Homoserine*                   | C <sub>4</sub> H <sub>9</sub> NO <sub>3</sub>                 | [M+H] <sup>+</sup> | Amino acids and derivatives | 3346953   | 1517704 | 1731007 | 1830747 | 772030  |
| 3      | Cycloleucine                    | C <sub>6</sub> H <sub>11</sub> NO <sub>2</sub>                | [M+H] <sup>+</sup> | Amino acids and derivatives | 2856446   | 3171362 | 5106498 | 7111748 | 4978656 |
| 4      | Tyr-Gly                         | C <sub>11</sub> H <sub>14</sub> N <sub>2</sub> O <sub>4</sub> | [M+H] <sup>+</sup> | Amino acids and derivatives | 848957    | 260028  | 351499  | 368940  | 39390   |
| 5      | L-Proline                       | C <sub>5</sub> H <sub>9</sub> NO <sub>2</sub>                 | [M+H] <sup>+</sup> | Amino acids and derivatives | 944566    | 686399  | 698029  | 916611  | 454889  |
| 6      | Phe-Thr                         | C <sub>13</sub> H <sub>18</sub> N <sub>2</sub> O <sub>4</sub> | [M+H] <sup>+</sup> | Amino acids and derivatives | 543675    | 600176  | 810948  | 966098  | 76632   |
| 7      | Glu-Phe                         | C <sub>14</sub> H <sub>18</sub> N <sub>2</sub> O <sub>5</sub> | [M+H] <sup>+</sup> | Amino acids and derivatives | 431328    | 318884  | 711703  | 646955  | 46754   |
| 8      | N-Palmitoylglycine              | C <sub>18</sub> H <sub>35</sub> NO <sub>3</sub>               | [M-H] <sup>-</sup> | Amino acids and derivatives | 54724     | 7320    | 10638   | 12193   | 10334   |
| 9      | L-Homocitrulline                | C <sub>7</sub> H <sub>15</sub> N <sub>3</sub> O <sub>3</sub>  | [M+H] <sup>+</sup> | Amino acids and derivatives | 964950    | 1197199 | 2115667 | 3086824 | 2251761 |
| 10     | L-Alanyl-L-Phenylalanine        | C <sub>12</sub> H <sub>16</sub> N <sub>2</sub> O <sub>3</sub> | [M+H] <sup>+</sup> | Amino acids and derivatives | 519769    | 1495427 | 1068905 | 1474906 | 185627  |
| 11     | Homoproline                     | C <sub>6</sub> H <sub>11</sub> NO <sub>2</sub>                | [M+H] <sup>+</sup> | Amino acids and derivatives | 4828622   | 4266581 | 4699032 | 9611612 | 9037646 |
| 12     | L-Threonine*                    | C <sub>4</sub> H <sub>9</sub> NO <sub>3</sub>                 | [M+H] <sup>+</sup> | Amino acids and             | 3292135   | 1579953 | 1636023 | 1830986 | 728713  |

|    |                         |                                                               |                    |                                               |          |          |          |          |          |
|----|-------------------------|---------------------------------------------------------------|--------------------|-----------------------------------------------|----------|----------|----------|----------|----------|
| 13 | L-Methionine Sulfoxide  | C <sub>5</sub> H <sub>11</sub> NO <sub>3</sub> S              | [M+H] <sup>+</sup> | derivatives<br>Amino acids and<br>derivatives | 8217603  | 8123731  | 8049554  | 7942515  | 7306520  |
| 14 | L-Valyl-L-Phenylalanine | C <sub>14</sub> H <sub>20</sub> N <sub>2</sub> O <sub>3</sub> | [M+H] <sup>+</sup> | Amino acids and<br>derivatives                | 2307551  | 1960542  | 2004553  | 2501121  | 184992   |
| 15 | L-Glutamic acid         | C <sub>5</sub> H <sub>9</sub> NO <sub>4</sub>                 | [M+H] <sup>+</sup> | Amino acids and<br>derivatives                | 5584748  | 19577579 | 20344320 | 16671648 | 7604039  |
| 16 | Arginine methyl ester*  | C <sub>7</sub> H <sub>16</sub> N <sub>4</sub> O <sub>2</sub>  | [M+H] <sup>+</sup> | Amino acids and<br>derivatives                | 3200870  | 1512266  | 2769214  | 3201359  | 1217086  |
| 17 | L-Allo-isoleucine       | C <sub>6</sub> H <sub>13</sub> NO <sub>2</sub>                | [M+H] <sup>+</sup> | Amino acids and<br>derivatives                | 65320163 | 36890056 | 38972515 | 52565836 | 28358880 |
| 18 | L-Histidine             | C <sub>6</sub> H <sub>9</sub> N <sub>3</sub> O <sub>2</sub>   | [M+H] <sup>+</sup> | Amino acids and<br>derivatives                | 5171612  | 2162171  | 2425533  | 2246138  | 797787   |
| 19 | Leu-Arg                 | C <sub>12</sub> H <sub>25</sub> N <sub>5</sub> O <sub>3</sub> | [M+H] <sup>+</sup> | Amino acids and<br>derivatives                | 797509   | 637710   | 1063931  | 1428458  | 53327    |
| 20 | 4-Hydroxy-L-Isoleucine  | C <sub>6</sub> H <sub>13</sub> NO <sub>3</sub>                | [M+H] <sup>+</sup> | Amino acids and<br>derivatives                | 425507   | 140926   | 158581   | 204322   | 143365   |
| 21 | N-Ethylmaleimide (NEM)  | C <sub>6</sub> H <sub>7</sub> NO <sub>2</sub>                 | [M+H] <sup>+</sup> | Amino acids and<br>derivatives                | 65362    | 346400   | 302226   | 523872   | 7624312  |
| 22 | N-Acetyl-L-tyrosine     | C <sub>11</sub> H <sub>13</sub> NO <sub>4</sub>               | [M+H] <sup>+</sup> | Amino acids and<br>derivatives                | 55529    | 24409    | 85814    | 120552   | 85484    |
| 23 | L-Tryptophan            | C <sub>11</sub> H <sub>12</sub> N <sub>2</sub> O <sub>2</sub> | [M-H] <sup>-</sup> | Amino acids and<br>derivatives                | 9010977  | 5179420  | 5811780  | 7190617  | 3766377  |
| 24 | Phe-Hyp                 | C <sub>14</sub> H <sub>18</sub> N <sub>2</sub> O <sub>4</sub> | [M+H] <sup>+</sup> | Amino acids and<br>derivatives                | 43614    | 24514    | 29311    | 34387    | 11938    |
| 25 | N-acetyl-beta-alanine   | C <sub>5</sub> H <sub>9</sub> NO <sub>3</sub>                 | [M-H] <sup>-</sup> | Amino acids and<br>derivatives                | 36291    | 19476    | 11047    | 24863    | 23345    |
| 26 | L-Isoleucine*           | C <sub>6</sub> H <sub>13</sub> NO <sub>2</sub>                | [M+H] <sup>+</sup> | Amino acids and                               | 3087661  | 1845265  | 1507195  | 2787288  | 606122   |



|    |                             |                                                               |                    |                             |          |          |          |          |          |
|----|-----------------------------|---------------------------------------------------------------|--------------------|-----------------------------|----------|----------|----------|----------|----------|
|    |                             |                                                               |                    | derivatives                 |          |          |          |          |          |
| 27 | L-Tyrosine                  | C <sub>9</sub> H <sub>11</sub> NO <sub>3</sub>                | [M+H] <sup>+</sup> | Amino acids and derivatives | 26545465 | 16802913 | 20948953 | 25533084 | 11493049 |
| 28 | L-Cyclopentylglycine        | C <sub>7</sub> H <sub>13</sub> NO <sub>2</sub>                | [M+H] <sup>+</sup> | Amino acids and derivatives | 943764   | 1314918  | 943457   | 861439   | 931774   |
| 29 | Trimethyllysine             | C <sub>9</sub> H <sub>20</sub> N <sub>2</sub> O <sub>2</sub>  | [M+H] <sup>+</sup> | Amino acids and derivatives | 3652832  | 805615   | 1196915  | 1820041  | 574160   |
| 30 | Cyclo(Ser-Pro)              | C <sub>8</sub> H <sub>12</sub> N <sub>2</sub> O <sub>3</sub>  | [M+H] <sup>+</sup> | Amino acids and derivatives | 178073   | 204325   | 246818   | 399456   | 233436   |
| 31 | N(6),N(6)-Dimethyl-L-lysine | C <sub>8</sub> H <sub>18</sub> N <sub>2</sub> O <sub>2</sub>  | [M+H] <sup>+</sup> | Amino acids and derivatives | 24934002 | 8950551  | 21495605 | 25002784 | 8720977  |
| 32 | Glycyl-tryptophan           | C <sub>13</sub> H <sub>15</sub> N <sub>3</sub> O <sub>3</sub> | [M+H] <sup>+</sup> | Amino acids and derivatives | 666562   | 104227   | 147766   | 155429   | 9        |
| 33 | N-Acetyl-L-glutamic acid    | C <sub>7</sub> H <sub>11</sub> NO <sub>5</sub>                | [M-H] <sup>-</sup> | Amino acids and derivatives | 140546   | 164145   | 136163   | 204125   | 192896   |
| 34 | L-Glycyl-L-proline          | C <sub>7</sub> H <sub>12</sub> N <sub>2</sub> O <sub>3</sub>  | [M+H] <sup>+</sup> | Amino acids and derivatives | 1637573  | 258856   | 379381   | 369575   | 36825    |
| 35 | 3-Hydroxy-L-phenylalanine   | C <sub>9</sub> H <sub>11</sub> NO <sub>3</sub>                | [M+H] <sup>+</sup> | Amino acids and derivatives | 27058260 | 15555670 | 20527223 | 25890451 | 11756447 |
| 36 | L-Glycyl-L-phenylalanine*   | C <sub>11</sub> H <sub>14</sub> N <sub>2</sub> O <sub>3</sub> | [M+H] <sup>+</sup> | Amino acids and derivatives | 2357287  | 1700480  | 2012014  | 2556282  | 210583   |
| 37 | L-Valyl-L-Leucine           | C <sub>9</sub> H <sub>11</sub> NO <sub>3</sub>                | [M+H] <sup>+</sup> | Amino acids and derivatives | 6064454  | 5676507  | 5818411  | 8502584  | 468001   |
| 38 | L-Leucyl-L-phenylalanine    | C <sub>11</sub> H <sub>14</sub> N <sub>2</sub> O <sub>3</sub> | [M+H] <sup>+</sup> | Amino acids and derivatives | 580573   | 1331661  | 1973922  | 2292058  | 128395   |
| 39 | cyclo-(Gly-Phe)             | C <sub>9</sub> H <sub>11</sub> NO <sub>3</sub>                | [M+H] <sup>+</sup> | Amino acids and derivatives | 31321428 | 17573250 | 18426224 | 22686489 | 12108940 |
| 40 | Cyclo(Ala-Gly)              | C <sub>11</sub> H <sub>14</sub> N <sub>2</sub> O <sub>3</sub> | [M+H] <sup>+</sup> | Amino acids and derivatives | 190563   | 382802   | 624596   | 660749   | 665730   |

|    |                           |                                                               |                    |                             |          |          |          |          |          |
|----|---------------------------|---------------------------------------------------------------|--------------------|-----------------------------|----------|----------|----------|----------|----------|
|    |                           |                                                               |                    | derivatives                 |          |          |          |          |          |
| 41 | N,N-Dimethylglycine*      | C <sub>9</sub> H <sub>11</sub> NO <sub>3</sub>                | [M+H] <sup>+</sup> | Amino acids and derivatives | 3394811  | 2514002  | 1612478  | 2089477  | 1253874  |
| 42 | L-Prolyl-L-Phenylalanine  | C <sub>11</sub> H <sub>14</sub> N <sub>2</sub> O <sub>3</sub> | [M+H] <sup>+</sup> | Amino acids and derivatives | 172557   | 261977   | 395417   | 523087   | 105208   |
| 43 | L-Arginine                | C <sub>9</sub> H <sub>11</sub> NO <sub>3</sub>                | [M+H] <sup>+</sup> | Amino acids and derivatives | 61311469 | 22045509 | 49949669 | 60723936 | 19914371 |
| 44 | L-Leucine*                | C <sub>11</sub> H <sub>14</sub> N <sub>2</sub> O <sub>3</sub> | [M+H] <sup>+</sup> | Amino acids and derivatives | 3076767  | 1307311  | 1472292  | 1998677  | 264850   |
| 45 | L-Asparagine              | C <sub>9</sub> H <sub>11</sub> NO <sub>3</sub>                | [M+H] <sup>+</sup> | Amino acids and derivatives | 12218275 | 11574965 | 20890185 | 19220753 | 7616296  |
| 46 | Pyroglutamic acid         | C <sub>11</sub> H <sub>14</sub> N <sub>2</sub> O <sub>3</sub> | [M+H] <sup>+</sup> | Amino acids and derivatives | 788835   | 985739   | 1881837  | 2241970  | 1637547  |
| 47 | D-Allo-Isoleucine         | C <sub>9</sub> H <sub>11</sub> NO <sub>3</sub>                | [M+H] <sup>+</sup> | Amino acids and derivatives | 3014786  | 1324233  | 938577   | 2047396  | 263660   |
| 48 | L-Methionine              | C <sub>11</sub> H <sub>14</sub> N <sub>2</sub> O <sub>3</sub> | [M+H] <sup>+</sup> | Amino acids and derivatives | 978824   | 396510   | 612959   | 358240   | 68666    |
| 49 | NG,NG-Dimethyl-L-arginine | C <sub>9</sub> H <sub>11</sub> NO <sub>3</sub>                | [M+H] <sup>+</sup> | Amino acids and derivatives | 3162984  | 1318366  | 1810746  | 2220207  | 655631   |
| 50 | L-Lysine                  | C <sub>11</sub> H <sub>14</sub> N <sub>2</sub> O <sub>3</sub> | [M+H] <sup>+</sup> | Amino acids and derivatives | 202208   | 42313    | 64986    | 88492    | 29043    |
| 51 | L-Norleucine*             | C <sub>9</sub> H <sub>11</sub> NO <sub>3</sub>                | [M+H] <sup>+</sup> | Amino acids and derivatives | 3096538  | 770060   | 951573   | 2024144  | 252454   |
| 52 | N-Ethylglycine            | C <sub>11</sub> H <sub>14</sub> N <sub>2</sub> O <sub>3</sub> | [M+H] <sup>+</sup> | Amino acids and derivatives | 3398826  | 2656302  | 1622696  | 2054871  | 1367160  |
| 53 | S-Methyl-L-cysteine       | C <sub>9</sub> H <sub>11</sub> NO <sub>3</sub>                | [M+H] <sup>+</sup> | Amino acids and derivatives | 1073017  | 634943   | 810863   | 1053320  | 403532   |
| 54 | Gly-Tyr                   | C <sub>11</sub> H <sub>14</sub> N <sub>2</sub> O <sub>3</sub> | [M+H] <sup>+</sup> | Amino acids and             | 855102.  | 225741   | 344416   | 350556   | 39435    |

|    |                          |                                                               |                    |                             |          |         |         |         |         |
|----|--------------------------|---------------------------------------------------------------|--------------------|-----------------------------|----------|---------|---------|---------|---------|
|    |                          |                                                               |                    | derivatives                 |          |         |         |         |         |
| 55 | L-Phenylalanine          | C <sub>9</sub> H <sub>11</sub> NO <sub>3</sub>                | [M+H] <sup>+</sup> | Amino acids and derivatives | 15610895 | 6329810 | 7532951 | 9672381 | 3578181 |
| 56 | N-Glycyl-L-leucine*      | C <sub>11</sub> H <sub>14</sub> N <sub>2</sub> O <sub>3</sub> | [M+H] <sup>+</sup> | Amino acids and derivatives | 3198130  | 2736537 | 3428032 | 3994282 | 336012  |
| 57 | N-Monomethyl-L-arginine* | C <sub>9</sub> H <sub>11</sub> NO <sub>3</sub>                | [M+H] <sup>+</sup> | Amino acids and derivatives | 3142156  | 1734688 | 2735408 | 3368940 | 1085906 |
| 58 | L-Leucyl-L-Leucine       | C <sub>11</sub> H <sub>14</sub> N <sub>2</sub> O <sub>3</sub> | [M+H] <sup>+</sup> | Amino acids and derivatives | 1056368  | 1858366 | 3045657 | 3750223 | 189410  |
| 59 | L-Homocystine            | C <sub>9</sub> H <sub>11</sub> NO <sub>3</sub>                | [M+H] <sup>+</sup> | Amino acids and derivatives | 286798   | 576926  | 552160  | 549067  | 418160  |
| 60 | L-Isoleucyl-L-Aspartate  | C <sub>11</sub> H <sub>14</sub> N <sub>2</sub> O <sub>3</sub> | [M+H] <sup>+</sup> | Amino acids and derivatives | 3536472  | 902304  | 1014306 | 1286593 | 146823  |
| 61 | Glu-Phe-Ala              | C <sub>9</sub> H <sub>11</sub> NO <sub>3</sub>                | [M+H] <sup>+</sup> | Amino acids and derivatives | 9        | 100163  | 84530   | 95995   | 29406   |
| 62 | N-Acetyl-L-leucine       | C <sub>11</sub> H <sub>14</sub> N <sub>2</sub> O <sub>3</sub> | [M+H] <sup>+</sup> | Amino acids and derivatives | 433665   | 105735  | 163793  | 208818  | 290371  |
| 63 | L-Glycyl-L-isoleucine*   | C <sub>9</sub> H <sub>11</sub> NO <sub>3</sub>                | [M+H] <sup>+</sup> | Amino acids and derivatives | 3230880  | 2289262 | 2975624 | 3376743 | 283169  |
| 64 | O-Acetylserine           | C <sub>11</sub> H <sub>14</sub> N <sub>2</sub> O <sub>3</sub> | [M+H] <sup>+</sup> | Amino acids and derivatives | 581671   | 220781  | 257232  | 305598  | 322664  |
| 65 | L-Serine                 | C <sub>9</sub> H <sub>11</sub> NO <sub>3</sub>                | [M+H] <sup>+</sup> | Amino acids and derivatives | 188786   | 100737  | 126034  | 115325  | 77651   |
| 66 | Methyl 3-aminopropanoate | C <sub>11</sub> H <sub>14</sub> N <sub>2</sub> O <sub>3</sub> | [M+H] <sup>+</sup> | Amino acids and derivatives | 3173106  | 2477887 | 1553088 | 1937932 | 1192469 |
| 67 | Glycylphenylalanine*     | C <sub>9</sub> H <sub>11</sub> NO <sub>3</sub>                | [M+H] <sup>+</sup> | Amino acids and derivatives | 2329375  | 1574404 | 1892246 | 2402213 | 197199  |
| 68 | Phe-Ile                  | C <sub>11</sub> H <sub>14</sub> N <sub>2</sub> O <sub>3</sub> | [M+H] <sup>+</sup> | Amino acids and derivatives | 336320   | 308426  | 638695  | 727644  | 21690   |

|    |                                    |                                                               |                    |                             |        |         |         |         |         |
|----|------------------------------------|---------------------------------------------------------------|--------------------|-----------------------------|--------|---------|---------|---------|---------|
|    |                                    |                                                               |                    | derivatives                 |        |         |         |         |         |
| 69 | Lys-Asp                            | C <sub>9</sub> H <sub>11</sub> NO <sub>3</sub>                | [M+H] <sup>+</sup> | Amino acids and derivatives | 521783 | 533792  | 620172  | 608763  | 660264  |
| 70 | Cyclo(L-Ala-L-Pro)                 | C <sub>11</sub> H <sub>14</sub> N <sub>2</sub> O <sub>3</sub> | [M+H] <sup>+</sup> | Amino acids and derivatives | 30015  | 149269  | 267592  | 357560  | 261729  |
| 71 | L-Cystine                          | C <sub>9</sub> H <sub>11</sub> NO <sub>3</sub>                | [M+H] <sup>+</sup> | Amino acids and derivatives | 55801  | 229727  | 200388  | 155001  | 145984  |
| 72 | Asp-Lys                            | C <sub>11</sub> H <sub>14</sub> N <sub>2</sub> O <sub>3</sub> | [M+H] <sup>+</sup> | Amino acids and derivatives | 553619 | 575147  | 605569  | 621529  | 651812  |
| 73 | γ-Glutamyltyrosine                 | C <sub>9</sub> H <sub>11</sub> NO <sub>3</sub>                | [M+H] <sup>+</sup> | Amino acids and derivatives | 74787  | 38532   | 59846   | 95905   | 38573   |
| 74 | L-Glycine                          | C <sub>11</sub> H <sub>14</sub> N <sub>2</sub> O <sub>3</sub> | [M+H] <sup>+</sup> | Amino acids and derivatives | 103239 | 242407  | 7277    | 10698   | 9       |
| 75 | Ser-Trp                            | C <sub>9</sub> H <sub>11</sub> NO <sub>3</sub>                | [M+H] <sup>+</sup> | Amino acids and derivatives | 553317 | 123726  | 207461  | 189799  | 9       |
| 76 | Cyclo(Pro-Pro)                     | C <sub>11</sub> H <sub>14</sub> N <sub>2</sub> O <sub>3</sub> | [M+H] <sup>+</sup> | Amino acids and derivatives | 5970   | 17364   | 41210   | 40410   | 54018   |
| 77 | N-Acetyl-L-Glutamine               | C <sub>9</sub> H <sub>11</sub> NO <sub>3</sub>                | [M-H] <sup>-</sup> | Amino acids and derivatives | 906436 | 1066574 | 1097399 | 1409169 | 1196220 |
| 78 | L-Glutamine                        | C <sub>11</sub> H <sub>14</sub> N <sub>2</sub> O <sub>3</sub> | [M+H] <sup>+</sup> | Amino acids and derivatives | 182146 | 43030   | 55664   | 86238   | 24495   |
| 79 | N-Methyl-Trans-4-Hydroxy-L-Proline | C <sub>9</sub> H <sub>11</sub> NO <sub>3</sub>                | [M+H] <sup>+</sup> | Amino acids and derivatives | 181219 | 171707  | 157870  | 171797  | 238002  |
| 80 | N6-Acetyl-L-lysine                 | C <sub>11</sub> H <sub>14</sub> N <sub>2</sub> O <sub>3</sub> | [M+H] <sup>+</sup> | Amino acids and derivatives | 978866 | 267860  | 634864  | 635385  | 155170  |
| 81 | 3-Methyl-L-Histidine*              | C <sub>9</sub> H <sub>11</sub> NO <sub>3</sub>                | [M+H] <sup>+</sup> | Amino acids and derivatives | 118011 | 117130  | 113844  | 127192  | 122658  |
| 82 | 1-Methylhistidine*                 | C <sub>11</sub> H <sub>14</sub> N <sub>2</sub> O <sub>3</sub> | [M+H] <sup>+</sup> | Amino acids and             | 118011 | 117130  | 113844  | 127192  | 122658  |

|    |                                       |                                                               |                    |                             |          |         |         |         |         |
|----|---------------------------------------|---------------------------------------------------------------|--------------------|-----------------------------|----------|---------|---------|---------|---------|
|    |                                       |                                                               |                    | derivatives                 |          |         |         |         |         |
| 83 | L-Aspartyl-L-Phenylalanine            | C <sub>9</sub> H <sub>11</sub> NO <sub>3</sub>                | [M+H] <sup>+</sup> | Amino acids and derivatives | 1683441  | 250883  | 310839  | 357560  | 63233   |
| 84 | N- $\alpha$ -Acetyl-L-ornithine       | C <sub>11</sub> H <sub>14</sub> N <sub>2</sub> O <sub>3</sub> | [M-H] <sup>-</sup> | Amino acids and derivatives | 686334   | 224010  | 502157  | 448407  | 271480  |
| 85 | Homoarginine                          | C <sub>9</sub> H <sub>11</sub> NO <sub>3</sub>                | [M+H] <sup>+</sup> | Amino acids and derivatives | 507702   | 205077  | 376093  | 422719  | 160976  |
| 86 | Cyclo(D-Val-L-Pro)                    | C <sub>11</sub> H <sub>14</sub> N <sub>2</sub> O <sub>3</sub> | [M+H] <sup>+</sup> | Amino acids and derivatives | 20631    | 48768   | 92003   | 109075  | 93932   |
| 87 | L-Lysine-Butanoic Acid                | C <sub>9</sub> H <sub>11</sub> NO <sub>3</sub>                | [M+H] <sup>+</sup> | Amino acids and derivatives | 11008590 | 168367  | 146371  | 223827  | 70853   |
| 88 | L- $\alpha$ -Glutamyl-L-Glutamic Acid | C <sub>11</sub> H <sub>14</sub> N <sub>2</sub> O <sub>3</sub> | [M+H] <sup>+</sup> | Amino acids and derivatives | 333696   | 112998  | 114522  | 146529  | 38530   |
| 89 | 5-Oxoproline*                         | C <sub>9</sub> H <sub>11</sub> NO <sub>3</sub>                | [M-H] <sup>-</sup> | Amino acids and derivatives | 166542   | 205182  | 497766  | 720545  | 915317  |
| 90 | N-Acetyl-L-glycine                    | C <sub>11</sub> H <sub>14</sub> N <sub>2</sub> O <sub>3</sub> | [M-H] <sup>-</sup> | Amino acids and derivatives | 15262    | 8382    | 9       | 9       | 9652    |
| 91 | N-Acetyl-L-Tryptophan                 | C <sub>9</sub> H <sub>11</sub> NO <sub>3</sub>                | [M-H] <sup>-</sup> | Amino acids and derivatives | 1510213  | 1433952 | 1883386 | 1340879 | 2288421 |
| 92 | Cyclo(Pro-Val)                        | C <sub>11</sub> H <sub>14</sub> N <sub>2</sub> O <sub>3</sub> | [M+H] <sup>+</sup> | Amino acids and derivatives | 14080    | 37823   | 65227   | 81889   | 63948   |
| 93 | S-(Methyl)glutathione                 | C <sub>9</sub> H <sub>11</sub> NO <sub>3</sub>                | [M+H] <sup>+</sup> | Amino acids and derivatives | 265032   | 119395  | 288560  | 232088  | 173781  |
| 94 | Oxiglutatione                         | C <sub>11</sub> H <sub>14</sub> N <sub>2</sub> O <sub>3</sub> | [M-H] <sup>-</sup> | Amino acids and derivatives | 10895    | 20485   | 14238   | 13574   | 16380   |
| 95 | N-Acetyl-L-Arginine                   | C <sub>9</sub> H <sub>11</sub> NO <sub>3</sub>                | [M+H] <sup>+</sup> | Amino acids and derivatives | 226454   | 66311   | 95754   | 136282  | 40240   |
| 96 | S-Allyl-L-cysteine                    | C <sub>11</sub> H <sub>14</sub> N <sub>2</sub> O <sub>3</sub> | [M+H] <sup>+</sup> | Amino acids and             | 33344    | 9       | 16436   | 26153   | 9       |

|     |                                              |                                                               |                    |                                               |         |         |         |         |         |
|-----|----------------------------------------------|---------------------------------------------------------------|--------------------|-----------------------------------------------|---------|---------|---------|---------|---------|
| 97  | Val-Trp                                      | C <sub>9</sub> H <sub>11</sub> NO <sub>3</sub>                | [M+H] <sup>+</sup> | derivatives<br>Amino acids and<br>derivatives | 667065  | 173138  | 246842  | 266095  | 28502   |
| 98  | 3-Hydroxy-3-methylpentane-1,<br>5-dioic acid | C <sub>11</sub> H <sub>14</sub> N <sub>2</sub> O <sub>3</sub> | [M-H] <sup>-</sup> | Amino acids and<br>derivatives                | 917089  | 593128  | 1612293 | 2860918 | 714623  |
| 99  | N-Acetyl-L-Aspartic Acid                     | C <sub>9</sub> H <sub>11</sub> NO <sub>3</sub>                | [M-H] <sup>-</sup> | Amino acids and<br>derivatives                | 141532  | 48711   | 77080   | 126162  | 161786  |
| 100 | 1-Amino-1-cyclobutane-carbo<br>xylic-acid    | C <sub>11</sub> H <sub>14</sub> N <sub>2</sub> O <sub>3</sub> | [M+H] <sup>+</sup> | Amino acids and<br>derivatives                | 911259  | 643918  | 755447  | 926166  | 431669  |
| 101 | 5-Oxo-L-Proline*                             | C <sub>9</sub> H <sub>11</sub> NO <sub>3</sub>                | [M-H] <sup>-</sup> | Amino acids and<br>derivatives                | 170522  | 230356  | 496592  | 745846  | 981504  |
| 102 | N-Alpha-Acetyl-L-Asparagine                  | C <sub>11</sub> H <sub>14</sub> N <sub>2</sub> O <sub>3</sub> | [M-H] <sup>-</sup> | Amino acids and<br>derivatives                | 55130   | 125163  | 118735  | 85877   | 93379   |
| 103 | L-Phenylalanyl-L-phenylalanin<br>e           | C <sub>9</sub> H <sub>11</sub> NO <sub>3</sub>                | [M+H] <sup>+</sup> | Amino acids and<br>derivatives                | 46168   | 56326   | 96455   | 89191   | 7187    |
| 104 | γ-Glutamyl-L-valine                          | C <sub>11</sub> H <sub>14</sub> N <sub>2</sub> O <sub>3</sub> | [M+H] <sup>+</sup> | Amino acids and<br>derivatives                | 112609  | 40967   | 53838   | 77393   | 39945   |
| 105 | N-Acetyl-L-phenylalanine                     | C <sub>9</sub> H <sub>11</sub> NO <sub>3</sub>                | [M-H] <sup>-</sup> | Amino acids and<br>derivatives                | 324349  | 800151  | 720774  | 1085946 | 835864  |
| 106 | Tryptophan glutamic acid                     | C <sub>11</sub> H <sub>14</sub> N <sub>2</sub> O <sub>3</sub> | [M-H] <sup>-</sup> | Amino acids and<br>derivatives                | 18985   | 8280    | 16973   | 12646   | 9       |
| 107 | Cyclo(D-Leu-L-Pro)*                          | C <sub>9</sub> H <sub>11</sub> NO <sub>3</sub>                | [M+H] <sup>+</sup> | Amino acids and<br>derivatives                | 28163   | 62365   | 128791  | 172918  | 153173  |
| 108 | L-Valine                                     | C <sub>11</sub> H <sub>14</sub> N <sub>2</sub> O <sub>3</sub> | [M+H] <sup>+</sup> | Amino acids and<br>derivatives                | 3806988 | 2322182 | 2731012 | 3200260 | 1517940 |
| 109 | 5-L-Glutamyl-L-amino acid                    | C <sub>9</sub> H <sub>11</sub> NO <sub>3</sub>                | [M-H] <sup>-</sup> | Amino acids and<br>derivatives                | 39131   | 30743   | 28261   | 51260   | 23631   |
| 110 | γ-Glutamylphenylalanine                      | C <sub>11</sub> H <sub>14</sub> N <sub>2</sub> O <sub>3</sub> | [M-H] <sup>-</sup> | Amino acids and                               | 91816   | 35315   | 44444   | 57244   | 29686   |

|     |                               |                                                               |                    |                             |          |         |         |          |         |
|-----|-------------------------------|---------------------------------------------------------------|--------------------|-----------------------------|----------|---------|---------|----------|---------|
|     |                               |                                                               |                    | derivatives                 |          |         |         |          |         |
| 111 | N-(3-Indolylacetyl)-L-alanine | C <sub>9</sub> H <sub>11</sub> NO <sub>3</sub>                | [M+H] <sup>+</sup> | Amino acids and derivatives | 7863     | 11279   | 14316   | 13441    | 74295   |
| 112 | L-Tyrosine methyl ester       | C <sub>11</sub> H <sub>14</sub> N <sub>2</sub> O <sub>3</sub> | [M+H] <sup>+</sup> | Amino acids and derivatives | 67259    | 44094   | 48007   | 63640    | 76219   |
| 113 | L-threo-3-Methylaspartate     | C <sub>9</sub> H <sub>11</sub> NO <sub>3</sub>                | [M-H] <sup>-</sup> | Amino acids and derivatives | 139743   | 572905  | 810633  | 772336   | 328328  |
| 114 | N-Acetyl-L-threonine          | C <sub>11</sub> H <sub>14</sub> N <sub>2</sub> O <sub>3</sub> | [M-H] <sup>-</sup> | Amino acids and derivatives | 82977    | 63213   | 53304   | 72934    | 71372   |
| 115 | Cyclo(D-Phe-L-Pro)*           | C <sub>9</sub> H <sub>11</sub> NO <sub>3</sub>                | [M+H] <sup>+</sup> | Amino acids and derivatives | 17466    | 41479   | 81314   | 128863   | 86552   |
| 116 | N-Carbamoyl-L-aspartate       | C <sub>11</sub> H <sub>14</sub> N <sub>2</sub> O <sub>3</sub> | [M-H] <sup>-</sup> | Amino acids and derivatives | 21916    | 26155   | 25889   | 28217    | 37832   |
| 117 | Cyclo(Pro-Leu)*               | C <sub>9</sub> H <sub>11</sub> NO <sub>3</sub>                | [M+H] <sup>+</sup> | Amino acids and derivatives | 31890    | 86564   | 139721  | 197278   | 173443  |
| 118 | L-Aspartic Acid*              | C <sub>11</sub> H <sub>14</sub> N <sub>2</sub> O <sub>3</sub> | [M-H] <sup>-</sup> | Amino acids and derivatives | 41748490 | 6805380 | 8714255 | 10901341 | 6029527 |
| 119 | Cyclo(Tyr-Ala)                | C <sub>9</sub> H <sub>11</sub> NO <sub>3</sub>                | [M+H] <sup>+</sup> | Amino acids and derivatives | 9        | 13956   | 20841   | 27450    | 22150   |
| 120 | L-Alanyl-L-Alanine            | C <sub>11</sub> H <sub>14</sub> N <sub>2</sub> O <sub>3</sub> | [M-H] <sup>-</sup> | Amino acids and derivatives | 15370    | 22753   | 22731   | 28016    | 4182    |
| 121 | L-Citrulline                  | C <sub>9</sub> H <sub>11</sub> NO <sub>3</sub>                | [M+H] <sup>+</sup> | Amino acids and derivatives | 471464   | 158874  | 355376  | 459961   | 88722   |
| 122 | Cyclo(Pro-Phe)*               | C <sub>11</sub> H <sub>14</sub> N <sub>2</sub> O <sub>3</sub> | [M+H] <sup>+</sup> | Amino acids and derivatives | 10468    | 35378   | 82354   | 127063   | 79234   |
| 123 | N-Methylglycine               | C <sub>9</sub> H <sub>11</sub> NO <sub>3</sub>                | [M-H] <sup>-</sup> | Amino acids and derivatives | 31878    | 10868   | 10230   | 11230    | 9130    |
| 124 | Confertifoline                | C <sub>11</sub> H <sub>14</sub> N <sub>2</sub> O <sub>3</sub> | [M-H] <sup>-</sup> | Terpenoids                  | 1486337  | 1302606 | 1504205 | 1416946  | 1306415 |

|     |                                   |                                                               |                    |            |         |          |         |          |          |
|-----|-----------------------------------|---------------------------------------------------------------|--------------------|------------|---------|----------|---------|----------|----------|
| 125 | polygodial                        | C <sub>9</sub> H <sub>11</sub> NO <sub>3</sub>                | [M+H] <sup>+</sup> | Terpenoids | 81680   | 71000    | 74991   | 68836    | 64140    |
| 126 | Nootkatone                        | C <sub>11</sub> H <sub>14</sub> N <sub>2</sub> O <sub>3</sub> | [M+H] <sup>+</sup> | Terpenoids | 35157   | 16065    | 18816   | 26094    | 11080    |
| 127 | Elemol                            | C <sub>9</sub> H <sub>11</sub> NO <sub>3</sub>                | [M+H] <sup>+</sup> | Terpenoids | 8383925 | 9895400  | 9603332 | 10214048 | 10181036 |
| 128 | Secoxyloganin                     | C <sub>11</sub> H <sub>14</sub> N <sub>2</sub> O <sub>3</sub> | [M+H] <sup>+</sup> | Terpenoids | 56235   | 37793    | 37392   | 35830    | 29270    |
| 129 | Dihydrovomifoliol-O-β-D-glucoside | C <sub>9</sub> H <sub>11</sub> NO <sub>3</sub>                | [M+H] <sup>+</sup> | Terpenoids | 164870  | 107649   | 119095  | 138650   | 78040    |
| 130 | 6-Hydroxydendroxine               | C <sub>11</sub> H <sub>14</sub> N <sub>2</sub> O <sub>3</sub> | [M+H] <sup>+</sup> | Alkaloids  | 281905  | 207450   | 237761  | 134592   | 141766   |
| 131 | N-Methyldendrobine                | C <sub>9</sub> H <sub>11</sub> NO <sub>3</sub>                | [M+H] <sup>+</sup> | Alkaloids  | 1996402 | 721532   | 476642  | 828021   | 189203   |
| 132 | Loliolide                         | C <sub>11</sub> H <sub>14</sub> N <sub>2</sub> O <sub>3</sub> | [M+H] <sup>+</sup> | Terpenoids | 849052  | 2587919  | 1743012 | 3019353  | 2146262  |
| 133 | 8-Epiloganic acid                 | C <sub>9</sub> H <sub>11</sub> NO <sub>3</sub>                | [M-H] <sup>-</sup> | Terpenoids | 200004  | 359508   | 312449  | 299827   | 298755   |
| 134 | Genipin                           | C <sub>11</sub> H <sub>14</sub> N <sub>2</sub> O <sub>3</sub> | [M+H] <sup>+</sup> | Terpenoids | 99180   | 94943    | 93669   | 78625    | 73025    |
| 135 | Gardoside                         | C <sub>9</sub> H <sub>11</sub> NO <sub>3</sub>                | [M-H] <sup>-</sup> | Terpenoids | 21713   | 84502    | 80875   | 76534    | 52247    |
| 136 | Dehydroxysecologanic acid         | C <sub>11</sub> H <sub>14</sub> N <sub>2</sub> O <sub>3</sub> | [M+H] <sup>+</sup> | Terpenoids | 32268   | 220301   | 172680  | 169635   | 135523   |
| 137 | Perillyl alcohol                  | C <sub>9</sub> H <sub>11</sub> NO <sub>3</sub>                | [M+H] <sup>+</sup> | Terpenoids | 279834  | 433495   | 374629  | 576280   | 331408   |
| 138 | 3,4-Dihydrocatalposide            | C <sub>11</sub> H <sub>14</sub> N <sub>2</sub> O <sub>3</sub> | [M-H] <sup>-</sup> | Terpenoids | 142921  | 53940    | 72011   | 96869    | 45604    |
| 139 | Syringopicroside                  | C <sub>9</sub> H <sub>11</sub> NO <sub>3</sub>                | [M-H] <sup>-</sup> | Terpenoids | 428986  | 511573   | 549885  | 529556   | 580040   |
| 140 | Loganic acid                      | C <sub>11</sub> H <sub>14</sub> N <sub>2</sub> O <sub>3</sub> | [M-H] <sup>-</sup> | Terpenoids | 30268   | 27826    | 21804   | 22039    | 24543    |
| 141 | Vomifoliol                        | C <sub>9</sub> H <sub>11</sub> NO <sub>3</sub>                | [M+H] <sup>+</sup> | Terpenoids | 325345  | 222971   | 209902  | 240412   | 138001   |
| 142 | 6-O-Vanilloylajugol               | C <sub>11</sub> H <sub>14</sub> N <sub>2</sub> O <sub>3</sub> | [M-H] <sup>-</sup> | Terpenoids | 24285   | 22173    | 22371   | 23607    | 19619    |
| 143 | 6-O-Sinapoylajugol                | C <sub>9</sub> H <sub>11</sub> NO <sub>3</sub>                | [M-H] <sup>-</sup> | Terpenoids | 32840   | 44529    | 51403   | 49181    | 51609    |
| 144 | Geniposide                        | C <sub>11</sub> H <sub>14</sub> N <sub>2</sub> O <sub>3</sub> | [M+H] <sup>+</sup> | Terpenoids | 348786  | 387721   | 390330  | 336039   | 280799   |
| 145 | Deacetylasperulosidic acid        | C <sub>9</sub> H <sub>11</sub> NO <sub>3</sub>                | [M-H] <sup>-</sup> | Terpenoids | 5355    | 8309     | 8512    | 9377     | 7419     |
| 146 | 6-O-Trans-Caffeoyl Ajugol         | C <sub>11</sub> H <sub>14</sub> N <sub>2</sub> O <sub>3</sub> | [M-H] <sup>-</sup> | Terpenoids | 343957  | 282042   | 376326  | 428665   | 359005   |
| 147 | 7-Deoxyloganic acid               | C <sub>9</sub> H <sub>11</sub> NO <sub>3</sub>                | [M-H] <sup>-</sup> | Terpenoids | 31518   | 21660    | 24281   | 21044    | 26520    |
| 148 | Sweroside                         | C <sub>11</sub> H <sub>14</sub> N <sub>2</sub> O <sub>3</sub> | [M+H] <sup>+</sup> | Terpenoids | 274992  | 259971   | 173854  | 240102   | 172222   |
| 149 | Asperulosidic acid                | C <sub>9</sub> H <sub>11</sub> NO <sub>3</sub>                | [M-H] <sup>-</sup> | Terpenoids | 15084   | 15474    | 16133   | 22607    | 9        |
| 150 | 8-O-Acetylharpagide               | C <sub>11</sub> H <sub>14</sub> N <sub>2</sub> O <sub>3</sub> | [M-H] <sup>-</sup> | Terpenoids | 369103  | 475522   | 619943  | 529152   | 507814   |
| 151 | 3-Carbamyl-1-methylpyridiniu      | C <sub>9</sub> H <sub>11</sub> NO <sub>3</sub>                | [M+H] <sup>+</sup> | Alkaloids  | 6584048 | 11701835 | 6981285 | 7016431  | 4121239  |



|     |                                                           |                                                               |                    |            |         |         |         |         |         |
|-----|-----------------------------------------------------------|---------------------------------------------------------------|--------------------|------------|---------|---------|---------|---------|---------|
|     | m;(1-Methylnicotinamide)                                  |                                                               |                    |            |         |         |         |         |         |
| 152 | 3-Hydroxypyridine                                         | C <sub>11</sub> H <sub>14</sub> N <sub>2</sub> O <sub>3</sub> | [M+H] <sup>+</sup> | Alkaloids  | 17362   | 60973   | 92519   | 56599   | 360696  |
| 153 | 2-Picoline; 2-Methylpyridine                              | C <sub>9</sub> H <sub>11</sub> NO <sub>3</sub>                | [M+H] <sup>+</sup> | Alkaloids  | 152960  | 166653  | 151822  | 172718  | 174378  |
| 154 | 1,4-Dihydro-1-Methyl-4-oxo-3-pyridinecarboxamide          | C <sub>11</sub> H <sub>14</sub> N <sub>2</sub> O <sub>3</sub> | [M-H] <sup>-</sup> | Alkaloids  | 327431  | 94384   | 70497   | 65513   | 69069   |
| 155 | 3-pyridine-methanol-O-β-D-glucopyranosyl                  | C <sub>9</sub> H <sub>11</sub> NO <sub>3</sub>                | [M+H] <sup>+</sup> | Alkaloids  | 153840  | 281329  | 211034  | 547479  | 308599  |
| 156 | Nicotinic Acid Methyl Ester(Methyl Nicotinate)            | C <sub>11</sub> H <sub>14</sub> N <sub>2</sub> O <sub>3</sub> | [M+H] <sup>+</sup> | Alkaloids  | 14131   | 30889   | 57189   | 42466   | 222476  |
| 157 | Quinolinic Acid                                           | C <sub>9</sub> H <sub>11</sub> NO <sub>3</sub>                | [M-H] <sup>-</sup> | Alkaloids  | 54137   | 41599   | 28984   | 20883   | 22646   |
| 158 | Methyl L-pyroglutamate                                    | C <sub>11</sub> H <sub>14</sub> N <sub>2</sub> O <sub>3</sub> | [M+H] <sup>+</sup> | Alkaloids  | 469924  | 991050  | 1685458 | 2718534 | 9850649 |
| 159 | 2-Phenylethylamine                                        | C <sub>9</sub> H <sub>11</sub> NO <sub>3</sub>                | [M+H] <sup>+</sup> | Alkaloids  | 4092228 | 1074433 | 1270405 | 1933845 | 440161  |
| 160 | Phloretin                                                 | C <sub>11</sub> H <sub>14</sub> N <sub>2</sub> O <sub>3</sub> | [M-H] <sup>-</sup> | Flavonoids | 566194  | 392924  | 369266  | 219343  | 155443  |
| 161 | 4'-Hydroxy-2,6-dimethoxydihydrochalcone; Cochinchinenin A | C <sub>9</sub> H <sub>11</sub> NO <sub>3</sub>                | [M+H] <sup>+</sup> | Flavonoids | 6891    | 23549   | 15240   | 11709   | 10738   |
| 162 | Sieboldin                                                 | C <sub>11</sub> H <sub>14</sub> N <sub>2</sub> O <sub>3</sub> | [M-H] <sup>-</sup> | Flavonoids | 54837   | 85975   | 113682  | 106173  | 77305   |
| 163 | Dihydrochalcone-4'-O-glucoside                            | C <sub>9</sub> H <sub>11</sub> NO <sub>3</sub>                | [M-H] <sup>-</sup> | Flavonoids | 42971   | 62808   | 124159  | 146083  | 74057   |
| 164 | 3-Hydroxyphloretin-4'-O-glucoside                         | C <sub>11</sub> H <sub>14</sub> N <sub>2</sub> O <sub>3</sub> | [M-H] <sup>-</sup> | Flavonoids | 45600   | 33308   | 26147   | 37930   | 49718   |
| 165 | 2,4'-Dihydroxy-4,6-dimethoxydihydrochalcone               | C <sub>9</sub> H <sub>11</sub> NO <sub>3</sub>                | [M+H] <sup>+</sup> | Flavonoids | 56599   | 46328   | 127124  | 74083   | 46161   |
| 166 | Phloretin-2'-O-glucoside (Phlorizin)                      | C <sub>11</sub> H <sub>14</sub> N <sub>2</sub> O <sub>3</sub> | [M-H] <sup>-</sup> | Flavonoids | 20124   | 14991   | 22904   | 14843   | 17806   |
| 167 | Phloretin-4'-O-glucoside (Trilobatin)                     | C <sub>9</sub> H <sub>11</sub> NO <sub>3</sub>                | [M-H] <sup>-</sup> | Flavonoids | 13323   | 32329   | 56925   | 37907   | 40550   |
| 168 | 4-Methyl-5-thiazoleethanol                                | C <sub>11</sub> H <sub>14</sub> N <sub>2</sub> O <sub>3</sub> | [M+H] <sup>+</sup> | Others     | 40321   | 81733   | 71336   | 112644  | 148269  |

|     |                                                         |                                                               |                    |            |         |          |          |          |          |
|-----|---------------------------------------------------------|---------------------------------------------------------------|--------------------|------------|---------|----------|----------|----------|----------|
| 169 | 2-Decanol*                                              | C <sub>9</sub> H <sub>11</sub> NO <sub>3</sub>                | [M-H]-             | Others     | 2160469 | 2215124  | 2423818  | 2381935  | 2582759  |
| 170 | 1-Decanol*                                              | C <sub>11</sub> H <sub>14</sub> N <sub>2</sub> O <sub>3</sub> | [M-H]-             | Others     | 2113319 | 2237420  | 2325021  | 2351538  | 2542459  |
| 171 | Eucommiol                                               | C <sub>9</sub> H <sub>11</sub> NO <sub>3</sub>                | [M-H]-             | Others     | 1410078 | 1268129  | 964017   | 1290067  | 850155   |
| 172 | 1,2,4-Trihydroxyanthraquinone                           | C <sub>11</sub> H <sub>14</sub> N <sub>2</sub> O <sub>3</sub> | [M-H]-             | Quinones   | 20189   | 32912    | 35617    | 35079    | 18088    |
| 173 | 5,6-Dihydroxylucidin                                    | C <sub>9</sub> H <sub>11</sub> NO <sub>3</sub>                | [M-H]-             | Quinones   | 29761   | 12643    | 163125   | 83132    | 34469    |
| 174 | Pseudopurpurin(1,2,4-trihydroxy-3-carboxyanthraquinone) | C <sub>11</sub> H <sub>14</sub> N <sub>2</sub> O <sub>3</sub> | [M-H]-             | Quinones   | 68016   | 20678    | 434046   | 244949   | 73329    |
| 175 | Chrysophanol-9-anthrone                                 | C <sub>9</sub> H <sub>11</sub> NO <sub>3</sub>                | [M-H]-             | Quinones   | 1024613 | 1115608  | 995346   | 1266376  | 1847317  |
| 176 | Emodin                                                  | C <sub>11</sub> H <sub>14</sub> N <sub>2</sub> O <sub>3</sub> | [M-H]-             | Quinones   | 25147   | 10537    | 14299    | 13002    | 9        |
| 177 | Butin;<br>7,3',4'-Trihydroxyflavanone*                  | C <sub>9</sub> H <sub>11</sub> NO <sub>3</sub>                | [M+H] <sup>+</sup> | Flavonoids | 1532827 | 14477130 | 19118338 | 13647536 | 16822232 |
| 178 | Hesperetin-7-O-neohesperidoside(Neohesperidin)*         | C <sub>11</sub> H <sub>14</sub> N <sub>2</sub> O <sub>3</sub> | [M+H] <sup>+</sup> | Flavonoids | 373633  | 339355   | 449864   | 396543   | 425078   |
| 179 | Hesperetin-7-O-rutinoside (Hesperidin)*                 | C <sub>9</sub> H <sub>11</sub> NO <sub>3</sub>                | [M+H] <sup>+</sup> | Flavonoids | 275458  | 316885   | 411324   | 331409   | 402252   |
| 180 | Hesperetin-7-O-glucoside                                | C <sub>11</sub> H <sub>14</sub> N <sub>2</sub> O <sub>3</sub> | [M+H] <sup>+</sup> | Flavonoids | 169691  | 296162   | 354510   | 322873   | 212233   |
| 181 | Naringenin<br>(5,7,4'-Trihydroxyflavanone)*             | C <sub>9</sub> H <sub>11</sub> NO <sub>3</sub>                | [M+H] <sup>+</sup> | Flavonoids | 1486811 | 14557002 | 18568503 | 12560140 | 16668150 |
| 182 | Eriodictyol<br>(5,7,3',4'-Tetrahydroxyflavone)          | C <sub>11</sub> H <sub>14</sub> N <sub>2</sub> O <sub>3</sub> | [M+H] <sup>+</sup> | Flavonoids | 38278   | 86579    | 71515    | 68447    | 64308    |
| 183 | Naringenin-7-O-Rutinoside-4'-O-glucoside                | C <sub>9</sub> H <sub>11</sub> NO <sub>3</sub>                | [M-H]-             | Flavonoids | 37844   | 56952    | 58671    | 48362    | 41088    |
| 184 | Hesperetin-7-O-(6"-malonyl)glucoside                    | C <sub>11</sub> H <sub>14</sub> N <sub>2</sub> O <sub>3</sub> | [M-H]-             | Flavonoids | 240146  | 462995   | 700944   | 276853   | 548554   |
| 185 | Hesperetin                                              | C <sub>9</sub> H <sub>11</sub> NO <sub>3</sub>                | [M+H] <sup>+</sup> | Flavonoids | 28366   | 73961    | 65659    | 59637    | 54222    |
| 186 | Eriodictyol-7-O-Rutinoside (Eriocitrin)                 | C <sub>11</sub> H <sub>14</sub> N <sub>2</sub> O <sub>3</sub> | [M+H] <sup>+</sup> | Flavonoids | 75719   | 48731    | 39962    | 60858    | 86790    |

|     |                                                          |                                                               |                    |            |         |         |         |         |         |
|-----|----------------------------------------------------------|---------------------------------------------------------------|--------------------|------------|---------|---------|---------|---------|---------|
| 187 | Hesperetin-5-O-glucoside                                 | C <sub>9</sub> H <sub>11</sub> NO <sub>3</sub>                | [M-H]-             | Flavonoids | 1682961 | 1146743 | 1838608 | 2516929 | 1760621 |
| 188 | Eriodictyol-7-O-(6"-malonyl)glucoside                    | C <sub>11</sub> H <sub>14</sub> N <sub>2</sub> O <sub>3</sub> | [M+H] <sup>+</sup> | Flavonoids | 11490   | 15599   | 23984   | 7613    | 6276    |
| 189 | Cirsilineol<br>(4',5-Dihydroxy-3',6,7-trimethoxyflavone) | C <sub>9</sub> H <sub>11</sub> NO <sub>3</sub>                | [M-H]-             | Flavonoids | 23002   | 24194   | 20375   | 25324   | 19656   |
| 190 | Eriodictyol-3'-O-glucoside                               | C <sub>11</sub> H <sub>14</sub> N <sub>2</sub> O <sub>3</sub> | [M-H]-             | Flavonoids | 367590  | 1427006 | 1083332 | 700753  | 747292  |
| 191 | Homoeriodictyol                                          | C <sub>9</sub> H <sub>11</sub> NO <sub>3</sub>                | [M+H] <sup>+</sup> | Flavonoids | 48856   | 104090  | 90452   | 85966   | 88553   |
| 192 | Naringenin-7-O-Neohesperidoside(Naringin)                | C <sub>11</sub> H <sub>14</sub> N <sub>2</sub> O <sub>3</sub> | [M-H]-             | Flavonoids | 58556   | 104838  | 105948  | 101074  | 129376  |
| 193 | Naringenin-7-O-glucoside<br>(Prunin)                     | C <sub>9</sub> H <sub>11</sub> NO <sub>3</sub>                | [M-H]-             | Flavonoids | 14077   | 13245   | 75481   | 101855  | 16961   |
| 194 | Pinocembrin (Dihydrochrysin)                             | C <sub>11</sub> H <sub>14</sub> N <sub>2</sub> O <sub>3</sub> | [M+H] <sup>+</sup> | Flavonoids | 2800    | 11510   | 10790   | 9919    | 15804   |
| 195 | Naringenin-4'-O-glucoside*                               | C <sub>9</sub> H <sub>11</sub> NO <sub>3</sub>                | [M-H]-             | Flavonoids | 23927   | 48423   | 45899   | 55632   | 58436   |
| 196 | Naringenin-7-O-Rutinoside(Narirutin)                     | C <sub>11</sub> H <sub>14</sub> N <sub>2</sub> O <sub>3</sub> | [M+H] <sup>+</sup> | Flavonoids | 24885   | 39409   | 40496   | 36010   | 50894   |
| 197 | Butin-7-O-glucoside*                                     | C <sub>9</sub> H <sub>11</sub> NO <sub>3</sub>                | [M-H]-             | Flavonoids | 20698   | 29938   | 36493   | 39309   | 41540   |
| 198 | Eriodictyol-7-O-(6"-O-p-coumaroyl)glucoside              | C <sub>11</sub> H <sub>14</sub> N <sub>2</sub> O <sub>3</sub> | [M-H]-             | Flavonoids | 4118    | 3986    | 3940    | 2166    | 9       |
| 199 | 3,5,7-Trihydroxyflavanone<br>(Pinobanksin)*              | C <sub>9</sub> H <sub>11</sub> NO <sub>3</sub>                | [M-H]-             | Flavonoids | 3129725 | 2621134 | 2659502 | 2242491 | 2071668 |
| 200 | Taxifolin(Dihydroquercetin)                              | C <sub>11</sub> H <sub>14</sub> N <sub>2</sub> O <sub>3</sub> | [M-H]-             | Flavonoids | 68373   | 54756   | 51330   | 50790   | 48768   |
| 201 | Aromadendrin<br>(Dihydrokaempferol)                      | C <sub>9</sub> H <sub>11</sub> NO <sub>3</sub>                | [M-H]-             | Flavonoids | 14752   | 20223   | 17611   | 16988   | 21058   |
| 202 | Taxifolin-3'-O-glucoside                                 | C <sub>11</sub> H <sub>14</sub> N <sub>2</sub> O <sub>3</sub> | [M-H]-             | Flavonoids | 47677   | 37344   | 38670   | 70868   | 68690   |
| 203 | Kaurenoic Acid                                           | C <sub>9</sub> H <sub>11</sub> NO <sub>3</sub>                | [M-H]-             | Terpenoids | 167644  | 100918  | 69036   | 57989   | 93047   |
| 204 | Pimaric acid                                             | C <sub>11</sub> H <sub>14</sub> N <sub>2</sub> O <sub>3</sub> | [M-H]-             | Terpenoids | 169308  | 101972  | 69729   | 54924   | 92953   |
| 205 | Ferruginol                                               | C <sub>9</sub> H <sub>11</sub> NO <sub>3</sub>                | [M-H]-             | Terpenoids | 638307  | 196506  | 157627  | 274338  | 162554  |

|     |                                                                    |                                                               |                    |            |         |         |         |         |         |
|-----|--------------------------------------------------------------------|---------------------------------------------------------------|--------------------|------------|---------|---------|---------|---------|---------|
| 206 | 12-Hydroxyabiatic Acid                                             | C <sub>11</sub> H <sub>14</sub> N <sub>2</sub> O <sub>3</sub> | [M+H] <sup>+</sup> | Terpenoids | 97281   | 25473   | 54166   | 56369   | 29043   |
| 207 | 3'-O-methylbatatasin III                                           | C <sub>9</sub> H <sub>11</sub> NO <sub>3</sub>                | [M+H] <sup>+</sup> | Quinones   | 3272830 | 6397296 | 4050160 | 3911487 | 3027115 |
| 208 | 2,5-dihydroxy-3,4-dimethoxy-9,10-dihydrophenanthrene               | C <sub>11</sub> H <sub>14</sub> N <sub>2</sub> O <sub>3</sub> | [M-H] <sup>-</sup> | Quinones   | 678797  | 1377671 | 1615926 | 849479  | 1518664 |
| 209 | Ephemeranthol A                                                    | C <sub>9</sub> H <sub>11</sub> NO <sub>3</sub>                | [M+H] <sup>+</sup> | Quinones   | 224212  | 236447  | 180745  | 134736  | 99206   |
| 210 | 2,5-dihydroxy-3,4-dimethoxyphenanthrene                            | C <sub>11</sub> H <sub>14</sub> N <sub>2</sub> O <sub>3</sub> | [M-H] <sup>-</sup> | Quinones   | 13500   | 27526   | 27479   | 25456   | 17355   |
| 211 | Denbinobin                                                         | C <sub>9</sub> H <sub>11</sub> NO <sub>3</sub>                | [M+H] <sup>+</sup> | Quinones   | 1892340 | 3999108 | 3882995 | 3647770 | 2465487 |
| 212 | Ephemeranthol B;<br>Flavanthridin                                  | C <sub>11</sub> H <sub>14</sub> N <sub>2</sub> O <sub>3</sub> | [M+H] <sup>+</sup> | Quinones   | 1081520 | 2269966 | 2764414 | 1385494 | 2453732 |
| 213 | 4,6-dimethoxyphenanthrene-2,3,7-triol                              | C <sub>9</sub> H <sub>11</sub> NO <sub>3</sub>                | [M-H] <sup>-</sup> | Quinones   | 574421  | 1937216 | 1399384 | 885899  | 980861  |
| 214 | 4,7-Dihydroxy-2-methoxy-9,10-dihydrophenanthrene;<br>Lusianthridin | C <sub>11</sub> H <sub>14</sub> N <sub>2</sub> O <sub>3</sub> | [M+H] <sup>+</sup> | Quinones   | 42380   | 97948   | 9       | 62751   | 45477   |
| 215 | Hircinol                                                           | C <sub>9</sub> H <sub>11</sub> NO <sub>3</sub>                | [M+H] <sup>+</sup> | Quinones   | 200638  | 885876  | 709516  | 454017  | 342466  |
| 216 | 2,3-dihydroxy-7-methoxy-9,10-dihydro-phenanthrene                  | C <sub>11</sub> H <sub>14</sub> N <sub>2</sub> O <sub>3</sub> | [M-H] <sup>-</sup> | Quinones   | 54382   | 85014   | 106371  | 83522   | 71169   |
| 217 | 4-Methoxy-9,10-dihydrophenanthrene-2,5-diphenol                    | C <sub>9</sub> H <sub>11</sub> NO <sub>3</sub>                | [M-H] <sup>-</sup> | Quinones   | 652905  | 2072014 | 1313565 | 1103658 | 1194608 |
| 218 | 4,6-dimethoxy-9,10-dihydrophenanthrene-2,3,7-triol                 | C <sub>11</sub> H <sub>14</sub> N <sub>2</sub> O <sub>3</sub> | [M-H] <sup>-</sup> | Quinones   | 183262  | 276254  | 150195  | 190915  | 151538  |
| 219 | 3,4-dihydroxy-2,7-dimethoxyphenanthrene                            | C <sub>9</sub> H <sub>11</sub> NO <sub>3</sub>                | [M-H] <sup>-</sup> | Quinones   | 36957   | 74499   | 47170   | 28451   | 19015   |
| 220 | 1,4-dihydroxy-7-methoxy-9,10-dihydro-phenanthrene                  | C <sub>11</sub> H <sub>14</sub> N <sub>2</sub> O <sub>3</sub> | [M-H] <sup>-</sup> | Quinones   | 13281   | 31994   | 26980   | 19937   | 18552   |
| 221 | 2,7-dihydroxy-3,4-dimethoxy-9,10-dihydrophenanthrene               | C <sub>9</sub> H <sub>11</sub> NO <sub>3</sub>                | [M-H] <sup>-</sup> | Quinones   | 707469  | 1456774 | 1697374 | 865094  | 1481785 |

|     |                                                                     |                                                               |                    |          |         |         |         |         |         |
|-----|---------------------------------------------------------------------|---------------------------------------------------------------|--------------------|----------|---------|---------|---------|---------|---------|
| 222 | 2,5-dihydroxy-4-methoxy-9,10-dihydrophenanthrene                    | C <sub>11</sub> H <sub>14</sub> N <sub>2</sub> O <sub>3</sub> | [M-H]-             | Quinones | 89411   | 292563  | 194369  | 152121  | 178294  |
| 223 | 4-methoxy-9,10-dihydrophenanthrene-1,2,7-triol                      | C <sub>9</sub> H <sub>11</sub> NO <sub>3</sub>                | [M-H]-             | Quinones | 547880  | 421068  | 694124  | 283550  | 384237  |
| 224 | 1,7-dihydroxy-2,5-dimethoxy-9,10-dihydrophenanthrene                | C <sub>11</sub> H <sub>14</sub> N <sub>2</sub> O <sub>3</sub> | [M-H]-             | Quinones | 3778483 | 8128156 | 9828099 | 5026458 | 8935960 |
| 225 | 7-hydroxy-4-methoxyphenanthrene-2-O-glucoside                       | C <sub>9</sub> H <sub>11</sub> NO <sub>3</sub>                | [M-H]-             | Quinones | 21155   | 249461  | 1153527 | 445996  | 867205  |
| 226 | 1-p-Hydroxybenzyl-4-methoxy-9,10-dihydrophenanthrene-2,7-diol       | C <sub>11</sub> H <sub>14</sub> N <sub>2</sub> O <sub>3</sub> | [M+H] <sup>+</sup> | Quinones | 26249   | 48602   | 26211   | 25212   | 23169   |
| 227 | 9,10-Dihydro-2-methoxy-4,5-phenanthrenediol                         | C <sub>9</sub> H <sub>11</sub> NO <sub>3</sub>                | [M-H]-             | Quinones | 177360  | 389990  | 491626  | 322723  | 382094  |
| 228 | Cannabidihydrophenanthrene                                          | C <sub>11</sub> H <sub>14</sub> N <sub>2</sub> O <sub>3</sub> | [M-H]-             | Quinones | 5777    | 13978   | 15546   | 10667   | 13995   |
| 229 | 2,4,7-trihydroxy-9,10-dihydrophenanthrene                           | C <sub>9</sub> H <sub>11</sub> NO <sub>3</sub>                | [M-H]-             | Quinones | 118585  | 205871  | 393314  | 251274  | 454217  |
| 230 | 1-(3'-methoxy-4'-hydroxybenzyl)-2,7-dihydroxy-4-methoxyphenanthrene | C <sub>11</sub> H <sub>14</sub> N <sub>2</sub> O <sub>3</sub> | [M-H]-             | Quinones | 780568  | 135779  | 489314  | 447322  | 31274   |
| 231 | 2,4-dihydroxy-7-methoxy-9,10-dihydrophenanthrene                    | C <sub>9</sub> H <sub>11</sub> NO <sub>3</sub>                | [M-H]-             | Quinones | 15711   | 46996   | 31448   | 26375   | 27986   |
| 232 | 2,7-Dihydroxy-4-methoxy-9,10-dihydrophenanthrene; Coelonin          | C <sub>11</sub> H <sub>14</sub> N <sub>2</sub> O <sub>3</sub> | [M-H]-             | Quinones | 141954  | 575552  | 508532  | 333020  | 254051  |
| 233 | 3,4-dihydroxy-7-methoxy-9,10-dihydro-phenanthrene                   | C <sub>9</sub> H <sub>11</sub> NO <sub>3</sub>                | [M-H]-             | Quinones | 20490   | 38888   | 50045   | 39131   | 28799   |
| 234 | 2,7-Dihydroxy-3,4,6-trimethoxyphenanthrene                          | C <sub>11</sub> H <sub>14</sub> N <sub>2</sub> O <sub>3</sub> | [M+H] <sup>+</sup> | Quinones | 24698   | 44712   | 42803   | 41305   | 38426   |

|     |                                                                                   |                                                               |                    |           |          |          |          |          |          |
|-----|-----------------------------------------------------------------------------------|---------------------------------------------------------------|--------------------|-----------|----------|----------|----------|----------|----------|
| 235 | 2,7-Dihydroxy-3,5-dimethoxy-9,10-dihydrophenanthrene                              | C <sub>9</sub> H <sub>11</sub> NO <sub>3</sub>                | [M-H] <sup>-</sup> | Quinones  | 270173   | 511144   | 494545   | 404695   | 333687   |
| 236 | 2,5-dihydroxyl-3,4,6-trimethoxy-9,10-dihydrophenanthrene                          | C <sub>11</sub> H <sub>14</sub> N <sub>2</sub> O <sub>3</sub> | [M-H] <sup>-</sup> | Quinones  | 12508    | 18696    | 32349    | 14597    | 20062    |
| 237 | 2,7-Dihydroxy-1-(p-hydroxybenzyl)-4-methoxy-9,10-dihydrophenanthrene-4'-O-glucose | C <sub>9</sub> H <sub>11</sub> NO <sub>3</sub>                | [M-H] <sup>-</sup> | Quinones  | 22905    | 31675    | 33772    | 29048    | 30057    |
| 238 | 7-Hydroxy-5,6-dimethoxy-1,4-phenanthrenequinone                                   | C <sub>11</sub> H <sub>14</sub> N <sub>2</sub> O <sub>3</sub> | [M+H] <sup>+</sup> | Quinones  | 10495    | 15480    | 12619    | 13386    | 9601     |
| 239 | 2,7-dihydroxy-4-methoxyphenanthrene                                               | C <sub>9</sub> H <sub>11</sub> NO <sub>3</sub>                | [M-H] <sup>-</sup> | Quinones  | 9327     | 2252     | 21717    | 9        | 4336     |
| 240 | 7-hydroxy-2,4-dimethoxyphenanthrene                                               | C <sub>11</sub> H <sub>14</sub> N <sub>2</sub> O <sub>3</sub> | [M-H] <sup>-</sup> | Quinones  | 21425    | 9337     | 8201     | 13754    | 3730     |
| 241 | N-Feruloyltyramine                                                                | C <sub>9</sub> H <sub>11</sub> NO <sub>3</sub>                | [M+H] <sup>+</sup> | Alkaloids | 11744909 | 12869451 | 16510852 | 9765508  | 13924845 |
| 242 | Vanillylamine                                                                     | C <sub>11</sub> H <sub>14</sub> N <sub>2</sub> O <sub>3</sub> | [M+H] <sup>+</sup> | Alkaloids | 77646    | 188506   | 456213   | 128577   | 33142    |
| 243 | p-Coumaroyltyramine*                                                              | C <sub>9</sub> H <sub>11</sub> NO <sub>3</sub>                | [M+H] <sup>+</sup> | Alkaloids | 4109145  | 2907860  | 3381059  | 1873108  | 2411023  |
| 244 | Cinnamoyltyramine                                                                 | C <sub>11</sub> H <sub>14</sub> N <sub>2</sub> O <sub>3</sub> | [M+H] <sup>+</sup> | Alkaloids | 1195498  | 1786756  | 1810230  | 1200408  | 1108528  |
| 245 | N-(2-Hydroxy-4-methoxyphenyl)acetamide                                            | C <sub>9</sub> H <sub>11</sub> NO <sub>3</sub>                | [M+H] <sup>+</sup> | Alkaloids | 24531194 | 14557267 | 19001657 | 22834133 | 10659454 |
| 246 | N-trans-ferulicacidacylp-hydroxyphenylethylamine                                  | C <sub>11</sub> H <sub>14</sub> N <sub>2</sub> O <sub>3</sub> | [M+H] <sup>+</sup> | Alkaloids | 10999970 | 12915418 | 16418932 | 9734995  | 13741952 |
| 247 | 4-Hydroxymandelonitrile                                                           | C <sub>9</sub> H <sub>11</sub> NO <sub>3</sub>                | [M+H] <sup>+</sup> | Alkaloids | 1122583  | 440140   | 718757   | 378743   | 69623    |
| 248 | N-Cis-Feruloyl-3'-O-methyl dopamine*                                              | C <sub>11</sub> H <sub>14</sub> N <sub>2</sub> O <sub>3</sub> | [M+H] <sup>+</sup> | Alkaloids | 1688958  | 2695499  | 3240311  | 1963980  | 2394778  |
| 249 | N-Cis-Feruloyltyramine                                                            | C <sub>9</sub> H <sub>11</sub> NO <sub>3</sub>                | [M+H] <sup>+</sup> | Alkaloids | 10860128 | 12417422 | 16511003 | 9959959  | 13456591 |
| 250 | N-Trans-Feruloyl-3'-O-methyl dopamine                                             | C <sub>11</sub> H <sub>14</sub> N <sub>2</sub> O <sub>3</sub> | [M+H] <sup>+</sup> | Alkaloids | 1664429  | 2552744  | 3303050  | 1974858  | 2368159  |
| 251 | N-Feruloyl-3-methoxytyramine                                                      | C <sub>9</sub> H <sub>11</sub> NO <sub>3</sub>                | [M+H] <sup>+</sup> | Alkaloids | 1459037  | 2337740  | 3113300  | 1754416  | 2240237  |

|     |                                                       |                                                               |                    |                |          |          |          |          |          |
|-----|-------------------------------------------------------|---------------------------------------------------------------|--------------------|----------------|----------|----------|----------|----------|----------|
|     | e*                                                    |                                                               |                    |                |          |          |          |          |          |
| 252 | N-(4-O-(Glucosyl)-E-feruloyl)-tyramine                | C <sub>11</sub> H <sub>14</sub> N <sub>2</sub> O <sub>3</sub> | [M-H] <sup>-</sup> | Alkaloids      | 155160   | 464915   | 850567   | 340990   | 375326   |
| 253 | Dihydro-N-feruloyltyramine                            | C <sub>9</sub> H <sub>11</sub> NO <sub>3</sub>                | [M+H] <sup>+</sup> | Alkaloids      | 70171    | 84509    | 95519    | 60320    | 78080    |
| 254 | N',N'',N'''-p-Coumaroyl-cinnamoyl-caffeoyl spermidine | C <sub>11</sub> H <sub>14</sub> N <sub>2</sub> O <sub>3</sub> | [M+H] <sup>+</sup> | Alkaloids      | 154853   | 108341   | 98158    | 145258   | 54043    |
| 255 | Feruloylspermidine                                    | C <sub>9</sub> H <sub>11</sub> NO <sub>3</sub>                | [M+H] <sup>+</sup> | Alkaloids      | 30225    | 98858    | 68008    | 112202   | 9        |
| 256 | Grossamide                                            | C <sub>11</sub> H <sub>14</sub> N <sub>2</sub> O <sub>3</sub> | [M+H] <sup>+</sup> | Alkaloids      | 367534   | 331268   | 417508   | 345394   | 394892   |
| 257 | N-Feruloyloctopamine                                  | C <sub>9</sub> H <sub>11</sub> NO <sub>3</sub>                | [M+H] <sup>+</sup> | Alkaloids      | 197722   | 186890   | 372589   | 191776   | 225844   |
| 258 | Dopamine                                              | C <sub>11</sub> H <sub>14</sub> N <sub>2</sub> O <sub>3</sub> | [M+H] <sup>+</sup> | Alkaloids      | 173917   | 1264995  | 2669079  | 468286   | 128064   |
| 259 | N-Feruloylputrescine                                  | C <sub>9</sub> H <sub>11</sub> NO <sub>3</sub>                | [M+H] <sup>+</sup> | Alkaloids      | 373600   | 479518   | 598025   | 439099   | 212802   |
| 260 | Dihydrocaffeoylspermine                               | C <sub>11</sub> H <sub>14</sub> N <sub>2</sub> O <sub>3</sub> | [M+H] <sup>+</sup> | Alkaloids      | 10349    | 11632    | 19490    | 54980    | 140605   |
| 261 | 2-Aminophenol                                         | C <sub>9</sub> H <sub>11</sub> NO <sub>3</sub>                | [M+H] <sup>+</sup> | Alkaloids      | 19852    | 9        | 58351    | 55182    | 9        |
| 262 | Sinapine                                              | C <sub>11</sub> H <sub>14</sub> N <sub>2</sub> O <sub>3</sub> | [M+H] <sup>+</sup> | Alkaloids      | 9        | 35327    | 18202    | 39107    | 45883    |
| 263 | p-Coumaroylferuloylcadaverine                         | C <sub>9</sub> H <sub>11</sub> NO <sub>3</sub>                | [M+H] <sup>+</sup> | Alkaloids      | 24550    | 23412    | 9        | 9        | 9        |
| 264 | p-Coumaroylputrescine                                 | C <sub>11</sub> H <sub>14</sub> N <sub>2</sub> O <sub>3</sub> | [M+H] <sup>+</sup> | Alkaloids      | 31923    | 133200   | 114938   | 107913   | 58618    |
| 265 | Cimicifugamide                                        | C <sub>9</sub> H <sub>11</sub> NO <sub>3</sub>                | [M+H] <sup>+</sup> | Alkaloids      | 18849    | 20485    | 23012    | 9        | 18006    |
| 266 | Caffeoylspermine                                      | C <sub>11</sub> H <sub>14</sub> N <sub>2</sub> O <sub>3</sub> | [M+H] <sup>+</sup> | Alkaloids      | 10501    | 7783     | 12158    | 14098    | 10658    |
| 267 | Butyl isobutyl phthalate*                             | C <sub>9</sub> H <sub>11</sub> NO <sub>3</sub>                | [M+H] <sup>+</sup> | Phenolic acids | 26289540 | 28762609 | 29233177 | 28844964 | 30811867 |
| 268 | 1-O-Sinapoyl-β-D-glucose                              | C <sub>11</sub> H <sub>14</sub> N <sub>2</sub> O <sub>3</sub> | [M-H] <sup>-</sup> | Phenolic acids | 144716   | 418930   | 742441   | 438473   | 767012   |
| 269 | Glucosyringic Acid                                    | C <sub>9</sub> H <sub>11</sub> NO <sub>3</sub>                | [M-H] <sup>-</sup> | Phenolic acids | 1590585  | 3774901  | 3204224  | 2890176  | 2159941  |
| 270 | Diisobutyl phthalate*                                 | C <sub>11</sub> H <sub>14</sub> N <sub>2</sub> O <sub>3</sub> | [M+H] <sup>+</sup> | Phenolic acids | 25874646 | 28910843 | 29620951 | 28899812 | 31479420 |
| 271 | Tachioside                                            | C <sub>9</sub> H <sub>11</sub> NO <sub>3</sub>                | [M-H] <sup>-</sup> | Phenolic acids | 1266960  | 2048146  | 2380908  | 1788063  | 2145974  |
| 272 | Isotachioside                                         | C <sub>11</sub> H <sub>14</sub> N <sub>2</sub> O <sub>3</sub> | [M-H] <sup>-</sup> | Phenolic acids | 828186   | 1302817  | 1527859  | 1132340  | 1611417  |
| 273 | 4-Nitrophenol                                         | C <sub>9</sub> H <sub>11</sub> NO <sub>3</sub>                | [M+H] <sup>+</sup> | Phenolic acids | 29804216 | 53335467 | 46132730 | 43159914 | 40833374 |
| 274 | 4-Hydroxycinnamic acid<br>p-hydroxyphenethylamine*    | C <sub>11</sub> H <sub>14</sub> N <sub>2</sub> O <sub>3</sub> | [M+H] <sup>+</sup> | Phenolic acids | 3811179  | 2958770  | 3440089  | 1926518  | 2525185  |

|     |                                                             |                                                               |                    |                |          |          |          |          |          |
|-----|-------------------------------------------------------------|---------------------------------------------------------------|--------------------|----------------|----------|----------|----------|----------|----------|
| 275 | Elemicin                                                    | C <sub>9</sub> H <sub>11</sub> NO <sub>3</sub>                | [M+H] <sup>+</sup> | Phenolic acids | 1458080  | 13206    | 32591    | 33832    | 9        |
| 276 | Cryptochlorogenic acid<br>(4-O-Caffeoylquinic acid)*        | C <sub>11</sub> H <sub>14</sub> N <sub>2</sub> O <sub>3</sub> | [M-H] <sup>-</sup> | Phenolic acids | 6039     | 40580    | 12633    | 41925    | 24535    |
| 277 | (S)-2-Phenyloxirane                                         | C <sub>9</sub> H <sub>11</sub> NO <sub>3</sub>                | [M+H] <sup>+</sup> | Phenolic acids | 14456910 | 24484671 | 31875970 | 30445741 | 11012283 |
| 278 | 4-O-Glucosyl-3,4-dihydroxybenzyl alcohol                    | C <sub>11</sub> H <sub>14</sub> N <sub>2</sub> O <sub>3</sub> | [M-H] <sup>-</sup> | Phenolic acids | 105220   | 89309    | 81969    | 86805    | 80830    |
| 279 | 1-O-(3,4-Dihydroxy-5-methoxybenzoyl)-glucoside              | C <sub>9</sub> H <sub>11</sub> NO <sub>3</sub>                | [M-H] <sup>-</sup> | Phenolic acids | 498704   | 132224   | 202005   | 190371   | 111464   |
| 280 | Phthalic anhydride                                          | C <sub>11</sub> H <sub>14</sub> N <sub>2</sub> O <sub>3</sub> | [M+H] <sup>+</sup> | Phenolic acids | 1334515  | 1466428  | 1574868  | 1450814  | 1537547  |
| 281 | 4-Methoxybenzaldehyde                                       | C <sub>9</sub> H <sub>11</sub> NO <sub>3</sub>                | [M+H] <sup>+</sup> | Phenolic acids | 419481   | 790718   | 1060673  | 535301   | 754408   |
| 282 | Coniferin                                                   | C <sub>11</sub> H <sub>14</sub> N <sub>2</sub> O <sub>3</sub> | [M-H] <sup>-</sup> | Phenolic acids | 34714    | 49309    | 58114    | 50568    | 49475    |
| 283 | 1-O-Gentisoyl-β-D-glucoside*                                | C <sub>9</sub> H <sub>11</sub> NO <sub>3</sub>                | [M-H] <sup>-</sup> | Phenolic acids | 1817467  | 2433976  | 2269067  | 1967162  | 1617339  |
| 284 | Dehydrodiconiferyl alcohol-γ-O-glucoside                    | C <sub>11</sub> H <sub>14</sub> N <sub>2</sub> O <sub>3</sub> | [M+H] <sup>+</sup> | Phenolic acids | 1627022  | 1843309  | 2169152  | 1376023  | 1452007  |
| 285 | Dimethyl phthalate                                          | C <sub>9</sub> H <sub>11</sub> NO <sub>3</sub>                | [M+H] <sup>+</sup> | Phenolic acids | 101006   | 141134   | 100388   | 103647   | 106279   |
| 286 | Coniferaldehyde                                             | C <sub>11</sub> H <sub>14</sub> N <sub>2</sub> O <sub>3</sub> | [M+H] <sup>+</sup> | Phenolic acids | 123386   | 181113   | 183953   | 190912   | 162680   |
| 287 | 2,3-Dihydroxy-1-(4-hydroxy-3,5-dimethoxyphenyl)propan-1-one | C <sub>9</sub> H <sub>11</sub> NO <sub>3</sub>                | [M+H] <sup>+</sup> | Phenolic acids | 162720   | 782192   | 568144   | 625941   | 259670   |
| 288 | 1-O-p-Coumaroyl-β-D-glucose*                                | C <sub>11</sub> H <sub>14</sub> N <sub>2</sub> O <sub>3</sub> | [M-H] <sup>-</sup> | Phenolic acids | 130728   | 111871   | 102590   | 101822   | 156536   |
| 289 | 1-Naphthol*                                                 | C <sub>9</sub> H <sub>11</sub> NO <sub>3</sub>                | [M-H] <sup>-</sup> | Phenolic acids | 7202     | 6007     | 16047    | 11661    | 9912     |
| 290 | Arbutin                                                     | C <sub>11</sub> H <sub>14</sub> N <sub>2</sub> O <sub>3</sub> | [M-H] <sup>-</sup> | Phenolic acids | 45518    | 78542    | 73803    | 81557    | 84254    |
| 291 | Salicylic acid-2-O-glucoside                                | C <sub>9</sub> H <sub>11</sub> NO <sub>3</sub>                | [M-H] <sup>-</sup> | Phenolic acids | 1027021  | 1203134  | 904069   | 972601   | 976742   |
| 292 | 2-Acetyl-3-hydroxyphenyl-1-O-glucoside                      | C <sub>11</sub> H <sub>14</sub> N <sub>2</sub> O <sub>3</sub> | [M-H] <sup>-</sup> | Phenolic acids | 137195   | 47693    | 71337    | 67600    | 44963    |
| 293 | Dihydrocaffeoylglucose                                      | C <sub>9</sub> H <sub>11</sub> NO <sub>3</sub>                | [M-H] <sup>-</sup> | Phenolic acids | 9        | 83420    | 83575    | 84568    | 71590    |
| 294 | 3,4,5-Trimethoxycinnamic                                    | C <sub>11</sub> H <sub>14</sub> N <sub>2</sub> O <sub>3</sub> | [M-H] <sup>-</sup> | Phenolic acids | 195165   | 60397    | 79006    | 110190   | 104421   |



|     |                                                         |                                                               |                                     |                |         |         |         |         |          |
|-----|---------------------------------------------------------|---------------------------------------------------------------|-------------------------------------|----------------|---------|---------|---------|---------|----------|
|     | acid                                                    |                                                               |                                     |                |         |         |         |         |          |
| 295 | 6-O-Caffeoyl-D-glucose*                                 | C <sub>9</sub> H <sub>11</sub> NO <sub>3</sub>                | [M-H]-                              | Phenolic acids | 168362  | 165633  | 203617  | 147647  | 137108   |
| 296 | 3-Hydroxy-1-(4-hydroxy-3,5-dimethoxyphenyl)propan-1-one | C <sub>11</sub> H <sub>14</sub> N <sub>2</sub> O <sub>3</sub> | [M+H] <sup>+</sup>                  | Phenolic acids | 4114645 | 1722598 | 1054715 | 1515913 | 676921   |
| 297 | Bis(2-ethylhexyl)phthalate*                             | C <sub>9</sub> H <sub>11</sub> NO <sub>3</sub>                | [M+H] <sup>+</sup>                  | Phenolic acids | 2141492 | 2940632 | 2536725 | 2700449 | 2839738  |
| 298 | Syringaldehyde-4-O-glucoside                            | C <sub>11</sub> H <sub>14</sub> N <sub>2</sub> O <sub>3</sub> | [M-H]-                              | Phenolic acids | 9       | 75982   | 85407   | 93413   | 85692    |
| 299 | 3,4'-Dihydroxy-3',5'-dimethoxypropiofenone              | C <sub>9</sub> H <sub>11</sub> NO <sub>3</sub>                | [M+H] <sup>+</sup>                  | Phenolic acids | 3544593 | 1417695 | 927032  | 1437714 | 616229   |
| 300 | Vanilloloside                                           | C <sub>11</sub> H <sub>14</sub> N <sub>2</sub> O <sub>3</sub> | [M-H]-                              | Phenolic acids | 1369789 | 1770661 | 1589442 | 1495440 | 1132741  |
| 301 | 1-O-Salicyloyl-β-D-glucose                              | C <sub>9</sub> H <sub>11</sub> NO <sub>3</sub>                | [M-H]-                              | Phenolic acids | 305223  | 996667  | 910235  | 974658  | 502576   |
| 302 | 4'-Hydroxypropiofenone                                  | C <sub>11</sub> H <sub>14</sub> N <sub>2</sub> O <sub>3</sub> | [M-H]-                              | Phenolic acids | 21904   | 8111    | 12192   | 11229   | 11056    |
| 303 | Ferulic acid*                                           | C <sub>9</sub> H <sub>11</sub> NO <sub>3</sub>                | [M-H]-                              | Phenolic acids | 1177316 | 1552069 | 2874573 | 1967933 | 2064006  |
| 304 | Isoferulic Acid*                                        | C <sub>11</sub> H <sub>14</sub> N <sub>2</sub> O <sub>3</sub> | [M-H]-                              | Phenolic acids | 1177316 | 1552069 | 2874573 | 1967933 | 2064006  |
| 305 | Phloroglucinol;<br>1,3,5-Benzenetriol                   | C <sub>9</sub> H <sub>11</sub> NO <sub>3</sub>                | [M+H] <sup>+</sup>                  | Phenolic acids | 183481  | 643927  | 506584  | 486167  | 10033911 |
| 306 | 2-Phenylethanol                                         | C <sub>11</sub> H <sub>14</sub> N <sub>2</sub> O <sub>3</sub> | [M-H <sub>2</sub> O+H] <sup>+</sup> | Phenolic acids | 2440490 | 781943  | 914224  | 1261362 | 369829   |
| 307 | Isoeugenol                                              | C <sub>9</sub> H <sub>11</sub> NO <sub>3</sub>                | [M+H] <sup>+</sup>                  | Phenolic acids | 52378   | 84316   | 64054   | 45796   | 47626    |
| 308 | 3,4-dihydroxyphenylethanol-β-D-glucopyranoside          | C <sub>11</sub> H <sub>14</sub> N <sub>2</sub> O <sub>3</sub> | [M-H]-                              | Phenolic acids | 46340   | 47862   | 47620   | 41640   | 33000    |
| 309 | Protocatechuic acid-4-O-glucoside*                      | C <sub>9</sub> H <sub>11</sub> NO <sub>3</sub>                | [M-H]-                              | Phenolic acids | 1431256 | 1729687 | 1560993 | 1399843 | 1148919  |
| 310 | (S)-2-Hydroxy-3-(4-Hydroxyphenyl)Propanoic Acid         | C <sub>11</sub> H <sub>14</sub> N <sub>2</sub> O <sub>3</sub> | [M-H]-                              | Phenolic acids | 74039   | 18304   | 421873  | 552640  | 9        |
| 311 | 3-Aminosalicylic acid                                   | C <sub>9</sub> H <sub>11</sub> NO <sub>3</sub>                | [M-H]-                              | Phenolic acids | 208434  | 328013  | 219911  | 271627  | 267383   |
| 312 | 2-Hydroxyphenol-1-O-glucosyl(6→1)rhamnoside             | C <sub>11</sub> H <sub>14</sub> N <sub>2</sub> O <sub>3</sub> | [M-H]-                              | Phenolic acids | 185069  | 193914  | 105818  | 162492  | 220227   |
| 313 | Digalloylglucose                                        | C <sub>9</sub> H <sub>11</sub> NO <sub>3</sub>                | [M-H]-                              | Phenolic acids | 22598   | 27045   | 37114   | 24503   | 19729    |
| 314 | 3-(3,4,5-Trimethoxyphenyl)pro                           | C <sub>11</sub> H <sub>14</sub> N <sub>2</sub> O <sub>3</sub> | [M+H] <sup>+</sup>                  | Phenolic acids | 538200  | 921064  | 1722127 | 1247935 | 1831345  |

|     |                                             |                                                               |                    |                |          |         |         |         |         |
|-----|---------------------------------------------|---------------------------------------------------------------|--------------------|----------------|----------|---------|---------|---------|---------|
|     | pan-1-ol                                    |                                                               |                    |                |          |         |         |         |         |
| 315 | 2,3-Di-O-Galloyl-β-D-Glucose                | C <sub>9</sub> H <sub>11</sub> NO <sub>3</sub>                | [M-H]-             | Phenolic acids | 37820    | 56958   | 59456   | 61176   | 48733   |
| 316 | Syringic acid                               | C <sub>11</sub> H <sub>14</sub> N <sub>2</sub> O <sub>3</sub> | [M-H]-             | Phenolic acids | 10982746 | 4499367 | 8057462 | 6506910 | 7937008 |
| 317 | Diisooctyl Phthalate*                       | C <sub>9</sub> H <sub>11</sub> NO <sub>3</sub>                | [M+H] <sup>+</sup> | Phenolic acids | 5080164  | 6739797 | 6074528 | 6066409 | 6716733 |
| 318 | Benzamide                                   | C <sub>11</sub> H <sub>14</sub> N <sub>2</sub> O <sub>3</sub> | [M+H] <sup>+</sup> | Phenolic acids | 4027004  | 1032865 | 1262878 | 1862348 | 438506  |
| 319 | 3-Hydroxy-5-Methylphenol-1-O-Glucoside      | C <sub>9</sub> H <sub>11</sub> NO <sub>3</sub>                | [M-H]-             | Phenolic acids | 58433    | 78728   | 85439   | 79083   | 60387   |
| 320 | Sinapinaldehyde                             | C <sub>11</sub> H <sub>14</sub> N <sub>2</sub> O <sub>3</sub> | [M-H]-             | Phenolic acids | 1068069  | 2642660 | 3731358 | 2198663 | 3429071 |
| 321 | Disinapoyl glucoside                        | C <sub>9</sub> H <sub>11</sub> NO <sub>3</sub>                | [M-H]-             | Phenolic acids | 14889    | 20465   | 29155   | 20401   | 28531   |
| 322 | 4-Hydroxy-3,5-diisopropylbenzaldehyde       | C <sub>11</sub> H <sub>14</sub> N <sub>2</sub> O <sub>3</sub> | [M+H] <sup>+</sup> | Phenolic acids | 14852    | 32348   | 30465   | 33596   | 24766   |
| 323 | Methyl 2,4-dihydroxyphenylacetate*          | C <sub>9</sub> H <sub>11</sub> NO <sub>3</sub>                | [M-H]-             | Phenolic acids | 74217    | 20729   | 401219  | 507109  | 33083   |
| 324 | Benzyl-(2"-O-glucosyl)glucoside*            | C <sub>11</sub> H <sub>14</sub> N <sub>2</sub> O <sub>3</sub> | [M-H]-             | Phenolic acids | 18729    | 24786   | 33692   | 30096   | 29672   |
| 325 | Methyl sinapate                             | C <sub>9</sub> H <sub>11</sub> NO <sub>3</sub>                | [M-H]-             | Phenolic acids | 11992    | 6645    | 12546   | 5097    | 7718    |
| 326 | β-Oxoacteoside                              | C <sub>11</sub> H <sub>14</sub> N <sub>2</sub> O <sub>3</sub> | [M-H]-             | Phenolic acids | 14495    | 22347   | 21307   | 25078   | 28894   |
| 327 | Sinapic acid                                | C <sub>9</sub> H <sub>11</sub> NO <sub>3</sub>                | [M-H]-             | Phenolic acids | 195057   | 221763  | 1735315 | 417321  | 1321759 |
| 328 | Isovanillin                                 | C <sub>11</sub> H <sub>14</sub> N <sub>2</sub> O <sub>3</sub> | [M+H] <sup>+</sup> | Phenolic acids | 256661   | 1158971 | 827666  | 950681  | 1189674 |
| 329 | Coniferyl alcohol                           | C <sub>9</sub> H <sub>11</sub> NO <sub>3</sub>                | [M-H]-             | Phenolic acids | 116985   | 357369  | 1173778 | 303627  | 829048  |
| 330 | Dihydroxybenzoyl xyloside                   | C <sub>11</sub> H <sub>14</sub> N <sub>2</sub> O <sub>3</sub> | [M-H]-             | Phenolic acids | 263009   | 157636  | 209108  | 258544  | 154065  |
| 331 | Caffeic acid                                | C <sub>9</sub> H <sub>11</sub> NO <sub>3</sub>                | [M-H]-             | Phenolic acids | 166275   | 400250  | 655716  | 567593  | 237135  |
| 332 | Chlorogenic acid (3-O-Caffeoylquinic acid)* | C <sub>11</sub> H <sub>14</sub> N <sub>2</sub> O <sub>3</sub> | [M-H]-             | Phenolic acids | 13105    | 67495   | 29716   | 64350   | 26586   |
| 333 | Vanillin acetate                            | C <sub>9</sub> H <sub>11</sub> NO <sub>3</sub>                | [M+H] <sup>+</sup> | Phenolic acids | 239037   | 78005   | 66270   | 75284   | 48650   |
| 334 | Ethylparaben                                | C <sub>11</sub> H <sub>14</sub> N <sub>2</sub> O <sub>3</sub> | [M-H]-             | Phenolic acids | 300833   | 4385    | 17258   | 23842   | 9       |
| 335 | 3-hydroxyphenylacetic acid*                 | C <sub>9</sub> H <sub>11</sub> NO <sub>3</sub>                | [M-H]-             | Phenolic acids | 19820    | 14660   | 40602   | 32838   | 16532   |
| 336 | Hydroxytyrosol                              | C <sub>11</sub> H <sub>14</sub> N <sub>2</sub> O <sub>3</sub> | [M-H]-             | Phenolic acids | 26402    | 17159   | 400418  | 123385  | 9       |

|     |                                                                         |                                                               |                    |                |          |         |          |          |         |
|-----|-------------------------------------------------------------------------|---------------------------------------------------------------|--------------------|----------------|----------|---------|----------|----------|---------|
| 337 | 2,5-Dihydroxybenzaldehyde Methyl                                        | C <sub>9</sub> H <sub>11</sub> NO <sub>3</sub>                | [M-H]-             | Phenolic acids | 6932213  | 3719124 | 4872380  | 6059787  | 2957694 |
| 338 | 3-(3-hydroxy-4-methoxyphenyl)propanoate*                                | C <sub>11</sub> H <sub>14</sub> N <sub>2</sub> O <sub>3</sub> | [M-H]-             | Phenolic acids | 125974   | 109068  | 310932   | 119220   | 419613  |
| 339 | Trans-4-Hydroxycinnamic Acid Methyl Ester                               | C <sub>9</sub> H <sub>11</sub> NO <sub>3</sub>                | [M-H]-             | Phenolic acids | 64527    | 79120   | 67281    | 73982    | 40025   |
| 340 | p-Coumaryl alcohol                                                      | C <sub>11</sub> H <sub>14</sub> N <sub>2</sub> O <sub>3</sub> | [M-H]-             | Phenolic acids | 7324     | 16771   | 17903    | 9958     | 20407   |
| 341 | Ethyl ferulate                                                          | C <sub>9</sub> H <sub>11</sub> NO <sub>3</sub>                | [M-H]-             | Phenolic acids | 222655   | 24759   | 86989    | 91920    | 23913   |
| 342 | Salicyl Alcohol                                                         | C <sub>11</sub> H <sub>14</sub> N <sub>2</sub> O <sub>3</sub> | [M-H]-             | Phenolic acids | 27795    | 36809   | 60970    | 68050    | 29409   |
| 343 | 3,4-Dihydroxybenzoic acid (Protocatechuic acid)*                        | C <sub>9</sub> H <sub>11</sub> NO <sub>3</sub>                | [M-H]-             | Phenolic acids | 10233772 | 4825598 | 12994744 | 10958969 | 7472841 |
| 344 | Antiarol;<br>3,4,5-Trimethoxyphenol                                     | C <sub>11</sub> H <sub>14</sub> N <sub>2</sub> O <sub>3</sub> | [M+H] <sup>+</sup> | Phenolic acids | 171679   | 50452   | 134075   | 149575   | 63208   |
| 345 | 1-O-Feruloyl-β-D-glucose                                                | C <sub>9</sub> H <sub>11</sub> NO <sub>3</sub>                | [M-H]-             | Phenolic acids | 11699    | 142858  | 111284   | 78229    | 103722  |
| 346 | 4-Hydroxybenzoic acid                                                   | C <sub>11</sub> H <sub>14</sub> N <sub>2</sub> O <sub>3</sub> | [M-H]-             | Phenolic acids | 10929286 | 5909010 | 8090671  | 9798573  | 4696424 |
| 347 | 3,4-Dihydroxybenzoic Acid Ethyl Ester (Protocatechuic acid ethyl ester) | C <sub>9</sub> H <sub>11</sub> NO <sub>3</sub>                | [M-H]-             | Phenolic acids | 519621   | 9       | 33565    | 42307    | 9       |
| 348 | α-Hydroxycinnamic Acid*                                                 | C <sub>11</sub> H <sub>14</sub> N <sub>2</sub> O <sub>3</sub> | [M-H]-             | Phenolic acids | 250701   | 399651  | 712027   | 671067   | 867807  |
| 349 | 2,6-Di-tert-butylphenol*                                                | C <sub>9</sub> H <sub>11</sub> NO <sub>3</sub>                | [M-H]-             | Phenolic acids | 164368   | 198026  | 200869   | 186924   | 208564  |
| 350 | Ferulic acid methyl ester                                               | C <sub>11</sub> H <sub>14</sub> N <sub>2</sub> O <sub>3</sub> | [M-H]-             | Phenolic acids | 33176    | 47246   | 32006    | 46563    | 11419   |
| 351 | 2-Naphthol*                                                             | C <sub>9</sub> H <sub>11</sub> NO <sub>3</sub>                | [M-H]-             | Phenolic acids | 8452     | 8203    | 18337    | 12630    | 10149   |
| 352 | 2-(Formylamino)benzoic acid                                             | C <sub>11</sub> H <sub>14</sub> N <sub>2</sub> O <sub>3</sub> | [M-H]-             | Phenolic acids | 496818   | 1229832 | 1337622  | 1214657  | 1585674 |
| 353 | 2,3-Dihydroxybenzoic Acid*                                              | C <sub>9</sub> H <sub>11</sub> NO <sub>3</sub>                | [M-H]-             | Phenolic acids | 9105864  | 4309971 | 11775401 | 10107058 | 7020167 |
| 354 | 1-O-Vanilloyl-D-Glucose                                                 | C <sub>11</sub> H <sub>14</sub> N <sub>2</sub> O <sub>3</sub> | [M-H]-             | Phenolic acids | 39721    | 9       | 16944    | 12572    | 9       |
| 355 | 2-Amino-3-methoxybenzoic acid                                           | C <sub>9</sub> H <sub>11</sub> NO <sub>3</sub>                | [M+H] <sup>+</sup> | Phenolic acids | 115619   | 63391   | 60359    | 58670    | 105319  |
| 356 | Gallic acid-4-O-glucoside                                               | C <sub>11</sub> H <sub>14</sub> N <sub>2</sub> O <sub>3</sub> | [M-H]-             | Phenolic acids | 44213    | 16945   | 34831    | 26663    | 23431   |

|     |                                                   |                                                               |                    |                |         |          |         |          |          |
|-----|---------------------------------------------------|---------------------------------------------------------------|--------------------|----------------|---------|----------|---------|----------|----------|
| 357 | 4-Hydroxyphenylacetic acid*                       | C <sub>9</sub> H <sub>11</sub> NO <sub>3</sub>                | [M-H]-             | Phenolic acids | 23585   | 17698    | 51581   | 46434    | 26433    |
| 358 | Tyrosol;<br>4-Hydroxyphenylethanol                | C <sub>11</sub> H <sub>14</sub> N <sub>2</sub> O <sub>3</sub> | [M-H]-             | Phenolic acids | 65222   | 16648    | 71326   | 58389    | 29118    |
| 359 | Caffeic aldehyde                                  | C <sub>9</sub> H <sub>11</sub> NO <sub>3</sub>                | [M+H] <sup>+</sup> | Phenolic acids | 171374  | 350417   | 347349  | 328176   | 428298   |
| 360 | Gallic acid                                       | C <sub>11</sub> H <sub>14</sub> N <sub>2</sub> O <sub>3</sub> | [M-H]-             | Phenolic acids | 253491  | 197114   | 684595  | 1521339  | 503946   |
| 361 | 2,5-Dihydroxybenzoic acid;<br>Gentisic Acid*      | C <sub>9</sub> H <sub>11</sub> NO <sub>3</sub>                | [M-H]-             | Phenolic acids | 4178242 | 2025337  | 5442725 | 4745255  | 3195617  |
| 362 | 1-O-Caffeoyl-β-D-glucose*                         | C <sub>11</sub> H <sub>14</sub> N <sub>2</sub> O <sub>3</sub> | [M-H]-             | Phenolic acids | 197457  | 165987   | 187959  | 138641   | 128938   |
| 363 | Vanillic acid methyl ester                        | C <sub>9</sub> H <sub>11</sub> NO <sub>3</sub>                | [M-H]-             | Phenolic acids | 679936  | 35560    | 33976   | 36120    | 9157     |
| 364 | Vanillic acid-4-O-glucoside                       | C <sub>11</sub> H <sub>14</sub> N <sub>2</sub> O <sub>3</sub> | [M-H]-             | Phenolic acids | 9       | 43049    | 49142   | 65639    | 43509    |
| 365 | 3-Methyl-4,8-dihydroxy-3,4-di<br>hydroisocoumarin | C <sub>9</sub> H <sub>11</sub> NO <sub>3</sub>                | [M-H]-             | Phenolic acids | 76624   | 44400    | 220312  | 122996   | 9        |
| 366 | Benzyl-(2"-O-xylosyl)glucosid<br>e<br>Vanillin;   | C <sub>11</sub> H <sub>14</sub> N <sub>2</sub> O <sub>3</sub> | [M-H]-             | Phenolic acids | 534116  | 629799   | 370398  | 507155   | 535873   |
| 367 | 4-Hydroxy-3-Methoxybenzald<br>ehyde*              | C <sub>9</sub> H <sub>11</sub> NO <sub>3</sub>                | [M-H]-             | Phenolic acids | 2243830 | 10568435 | 9093065 | 9944159  | 13021884 |
| 368 | p-Coumaric acid                                   | C <sub>11</sub> H <sub>14</sub> N <sub>2</sub> O <sub>3</sub> | [M+H] <sup>+</sup> | Phenolic acids | 97539   | 244373   | 219113  | 207908   | 269252   |
| 369 | Methyl Syringate                                  | C <sub>9</sub> H <sub>11</sub> NO <sub>3</sub>                | [M-H]-             | Phenolic acids | 78510   | 49923    | 31771   | 37445    | 14611    |
| 370 | 4-Hydroxybenzaldehyde                             | C <sub>11</sub> H <sub>14</sub> N <sub>2</sub> O <sub>3</sub> | [M-H]-             | Phenolic acids | 3302999 | 7063659  | 6193319 | 7442008  | 10671741 |
| 371 | 4-Hydroxyphenyllactic Acid*                       | C <sub>9</sub> H <sub>11</sub> NO <sub>3</sub>                | [M-H]-             | Phenolic acids | 80089   | 25167    | 498166  | 628038   | 33857    |
| 372 | 4-Hydroxyacetophenone                             | C <sub>11</sub> H <sub>14</sub> N <sub>2</sub> O <sub>3</sub> | [M-H]-             | Phenolic acids | 112681  | 154765   | 186589  | 189326   | 273212   |
| 373 | Mucic acid Dimethyl Ester                         | C <sub>9</sub> H <sub>11</sub> NO <sub>3</sub>                | [M-H]-             | Phenolic acids | 5028229 | 4275716  | 3135598 | 2885608  | 1453988  |
| 374 | Salicylic acid                                    | C <sub>11</sub> H <sub>14</sub> N <sub>2</sub> O <sub>3</sub> | [M-H]-             | Phenolic acids | 103414  | 121605   | 223313  | 154687   | 204623   |
| 375 | 3-O-Methylgallic acid                             | C <sub>9</sub> H <sub>11</sub> NO <sub>3</sub>                | [M-H]-             | Phenolic acids | 221830  | 40103    | 205964  | 135965   | 58300    |
| 376 | Sinapyl alcohol*                                  | C <sub>11</sub> H <sub>14</sub> N <sub>2</sub> O <sub>3</sub> | [M-H]-             | Phenolic acids | 125022  | 125857   | 307547  | 117762   | 422771   |
| 377 | 2,4-Di-Tert-Butylphenol*                          | C <sub>9</sub> H <sub>11</sub> NO <sub>3</sub>                | [M-H]-             | Phenolic acids | 142506  | 181876   | 180940  | 169474   | 192214   |
| 378 | 3-Methoxybenzoic acid                             | C <sub>11</sub> H <sub>14</sub> N <sub>2</sub> O <sub>3</sub> | [M-H]-             | Phenolic acids | 261437  | 444960   | 6651946 | 10032047 | 624581   |

|     |                                                             |                                                               |                    |                |         |         |         |         |         |
|-----|-------------------------------------------------------------|---------------------------------------------------------------|--------------------|----------------|---------|---------|---------|---------|---------|
| 379 | 2,3-Dimethoxybenzaldehyde                                   | C <sub>9</sub> H <sub>11</sub> NO <sub>3</sub>                | [M+H] <sup>+</sup> | Phenolic acids | 65955   | 94575   | 81034   | 62534   | 104840  |
| 380 | 3-Hydroxycinnamic Acid*                                     | C <sub>11</sub> H <sub>14</sub> N <sub>2</sub> O <sub>3</sub> | [M-H] <sup>-</sup> | Phenolic acids | 360072  | 459743  | 755376  | 704391  | 991705  |
| 381 | 1-O-Cinnamoyl-4,6-(S)-HHDP<br>-β-D-glucose                  | C <sub>9</sub> H <sub>11</sub> NO <sub>3</sub>                | [M+H] <sup>+</sup> | Phenolic acids | 47736   | 32306   | 32333   | 48593   | 44690   |
| 382 | Vanillic acid                                               | C <sub>11</sub> H <sub>14</sub> N <sub>2</sub> O <sub>3</sub> | [M-H] <sup>-</sup> | Phenolic acids | 3362195 | 1814221 | 2095108 | 2433127 | 1086298 |
| 383 | 1,6-Di-O-caffeoyl-β-D-glucose                               | C <sub>9</sub> H <sub>11</sub> NO <sub>3</sub>                | [M-H] <sup>-</sup> | Phenolic acids | 1099900 | 500879  | 918052  | 994146  | 719630  |
| 384 | 4-O-Methylgallic Acid                                       | C <sub>11</sub> H <sub>14</sub> N <sub>2</sub> O <sub>3</sub> | [M-H] <sup>-</sup> | Phenolic acids | 148350  | 60632   | 102535  | 78116   | 64102   |
| 385 | 5-Acetylsalicylic acid                                      | C <sub>9</sub> H <sub>11</sub> NO <sub>3</sub>                | [M+H] <sup>+</sup> | Phenolic acids | 58263   | 28979   | 40458   | 45963   | 33809   |
| 386 | 4,5-O-Dicaffeoylquinic Acid<br>Methyl Ester                 | C <sub>11</sub> H <sub>14</sub> N <sub>2</sub> O <sub>3</sub> | [M-H] <sup>-</sup> | Phenolic acids | 12682   | 13199   | 7124    | 9552    | 17943   |
| 387 | Syringaldehyde;<br>4-Hydroxy-3,5-Dimethoxyben-<br>zaldehyde | C <sub>9</sub> H <sub>11</sub> NO <sub>3</sub>                | [M-H] <sup>-</sup> | Phenolic acids | 6691049 | 5893406 | 3940524 | 6431265 | 5123464 |
| 388 | Methyl 4-hydroxybenzoate*                                   | C <sub>11</sub> H <sub>14</sub> N <sub>2</sub> O <sub>3</sub> | [M-H] <sup>-</sup> | Phenolic acids | 398052  | 1920155 | 1580652 | 1863961 | 2267792 |
| 389 | Protocatechuic Acid Methyl<br>Ester                         | C <sub>9</sub> H <sub>11</sub> NO <sub>3</sub>                | [M-H] <sup>-</sup> | Phenolic acids | 546741  | 136963  | 265845  | 266792  | 62449   |
| 390 | Eudesmic acid<br>(3,4,5-trimethoxybenzoic acid)             | C <sub>11</sub> H <sub>14</sub> N <sub>2</sub> O <sub>3</sub> | [M+H] <sup>+</sup> | Phenolic acids | 111371  | 14346   | 15714   | 21716   | 15945   |
| 391 | Gallacetophenone                                            | C <sub>9</sub> H <sub>11</sub> NO <sub>3</sub>                | [M+H] <sup>+</sup> | Phenolic acids | 9       | 110650  | 144802  | 171546  | 132722  |
| 392 | Cinnamic acid                                               | C <sub>11</sub> H <sub>14</sub> N <sub>2</sub> O <sub>3</sub> | [M-H] <sup>-</sup> | Phenolic acids | 3932    | 25301   | 18740   | 20498   | 24802   |
| 393 | p-Coumaroylcaffeoyltartaric<br>acid                         | C <sub>9</sub> H <sub>11</sub> NO <sub>3</sub>                | [M-H] <sup>-</sup> | Phenolic acids | 34028   | 46701   | 23204   | 34574   | 26234   |
| 394 | O-Anisic acid<br>(2-Methoxybenzoic acid)*                   | C <sub>11</sub> H <sub>14</sub> N <sub>2</sub> O <sub>3</sub> | [M-H] <sup>-</sup> | Phenolic acids | 10868   | 7125    | 7977    | 7539    | 70136   |
| 395 | Phenoxyacetic acid*                                         | C <sub>9</sub> H <sub>11</sub> NO <sub>3</sub>                | [M-H] <sup>-</sup> | Phenolic acids | 10868   | 7125    | 7977    | 7539    | 70136   |
| 396 | p-Coumaroylmalic acid                                       | C <sub>11</sub> H <sub>14</sub> N <sub>2</sub> O <sub>3</sub> | [M-H] <sup>-</sup> | Phenolic acids | 4863    | 90043   | 75503   | 34478   | 59967   |
| 397 | 3-(4-Hydroxyphenyl)-1-propan-<br>ol                         | C <sub>9</sub> H <sub>11</sub> NO <sub>3</sub>                | [M-H] <sup>-</sup> | Phenolic acids | 130357  | 9680    | 4200    | 6344    | 2595    |

|     |                                             |                                                               |                    |                |        |        |        |         |         |
|-----|---------------------------------------------|---------------------------------------------------------------|--------------------|----------------|--------|--------|--------|---------|---------|
| 398 | Methyl gallate                              | C <sub>11</sub> H <sub>14</sub> N <sub>2</sub> O <sub>3</sub> | [M-H]-             | Phenolic acids | 41069  | 70674  | 171387 | 110731  | 56694   |
| 399 | Phenyl acetate                              | C <sub>9</sub> H <sub>11</sub> NO <sub>3</sub>                | [M-H]-             | Phenolic acids | 123364 | 162963 | 221212 | 230596  | 309351  |
| 400 | 4-Methoxyphenylpropionic acid               | C <sub>11</sub> H <sub>14</sub> N <sub>2</sub> O <sub>3</sub> | [M-H]-             | Phenolic acids | 34187  | 105515 | 328770 | 82186   | 232098  |
| 401 | 2-Hydroxycinnamic acid*                     | C <sub>9</sub> H <sub>11</sub> NO <sub>3</sub>                | [M-H]-             | Phenolic acids | 347456 | 560656 | 941203 | 839571  | 1080567 |
| 402 | p-Coumaric acid-4-O-glucoside*              | C <sub>11</sub> H <sub>14</sub> N <sub>2</sub> O <sub>3</sub> | [M-H]-             | Phenolic acids | 51683  | 33956  | 34068  | 35811   | 40104   |
| 403 | Dihydroferulic Acid                         | C <sub>9</sub> H <sub>11</sub> NO <sub>3</sub>                | [M-H]-             | Phenolic acids | 59227  | 119033 | 157751 | 121568  | 101076  |
| 404 | Propyl 4-hydroxybenzoate                    | C <sub>11</sub> H <sub>14</sub> N <sub>2</sub> O <sub>3</sub> | [M-H]-             | Phenolic acids | 11872  | 7498   | 9068   | 8940    | 12750   |
| 405 | 10-hydroxymajoroside                        | C <sub>9</sub> H <sub>11</sub> NO <sub>3</sub>                | [M-H]-             | Phenolic acids | 53966  | 39769  | 62166  | 155238  | 63034   |
| 406 | 3,4,5-Tricaffeoylquinic acid                | C <sub>11</sub> H <sub>14</sub> N <sub>2</sub> O <sub>3</sub> | [M-H]-             | Phenolic acids | 27419  | 49219  | 29885  | 34166   | 18896   |
| 407 | 3,4-Dimethoxyphenyl acetic acid             | C <sub>9</sub> H <sub>11</sub> NO <sub>3</sub>                | [M-H]-             | Phenolic acids | 21407  | 18574  | 39911  | 23212   | 19628   |
| 408 | Ethyl Rosmarinate                           | C <sub>11</sub> H <sub>14</sub> N <sub>2</sub> O <sub>3</sub> | [M+H] <sup>+</sup> | Phenolic acids | 16438  | 13382  | 11004  | 10530   | 14287   |
| 409 | 3,4-Di-O-caffeoylquinic acid methyl ester   | C <sub>9</sub> H <sub>11</sub> NO <sub>3</sub>                | [M+H] <sup>+</sup> | Phenolic acids | 23199  | 27709  | 22837  | 17600   | 18931   |
| 410 | 3-(3-Hydroxyphenyl)-3-hydroxypropanoic acid | C <sub>11</sub> H <sub>14</sub> N <sub>2</sub> O <sub>3</sub> | [M-H]-             | Phenolic acids | 51942  | 33390  | 36493  | 44611   | 18572   |
| 411 | 2-hydroxymethyl benzoic acid                | C <sub>9</sub> H <sub>11</sub> NO <sub>3</sub>                | [M-H]-             | Phenolic acids | 10341  | 10050  | 24267  | 15459   | 6560    |
| 412 | 2-Hydroxy-3-phenylpropanoic acid            | C <sub>11</sub> H <sub>14</sub> N <sub>2</sub> O <sub>3</sub> | [M-H]-             | Phenolic acids | 189265 | 74063  | 961835 | 851519  | 64956   |
| 413 | Anthranilate-1-O-Sophoroside                | C <sub>9</sub> H <sub>11</sub> NO <sub>3</sub>                | [M-H]-             | Phenolic acids | 723838 | 661377 | 923177 | 1163281 | 703294  |
| 414 | 2,6-Dimethoxybenzaldehyde*                  | C <sub>11</sub> H <sub>14</sub> N <sub>2</sub> O <sub>3</sub> | [M-H]-             | Phenolic acids | 196758 | 111590 | 948271 | 820780  | 128315  |
| 415 | Maleoyl-caffeoylquinic acid                 | C <sub>9</sub> H <sub>11</sub> NO <sub>3</sub>                | [M-H]-             | Phenolic acids | 44728  | 45803  | 45376  | 46658   | 27798   |
| 416 | Benzyl-β-gentiobioside*                     | C <sub>11</sub> H <sub>14</sub> N <sub>2</sub> O <sub>3</sub> | [M-H]-             | Phenolic acids | 17754  | 27902  | 30163  | 32050   | 24339   |
| 417 | 2-O-Galloyl-D-glucose                       | C <sub>9</sub> H <sub>11</sub> NO <sub>3</sub>                | [M-H]-             | Phenolic acids | 9      | 541864 | 660293 | 394327  | 512603  |
| 418 | 4-Methylphenol                              | C <sub>11</sub> H <sub>14</sub> N <sub>2</sub> O <sub>3</sub> | [M-H]-             | Phenolic acids | 73028  | 3324   | 3046   | 5192    | 1880    |
| 419 | Methyl                                      | C <sub>9</sub> H <sub>11</sub> NO <sub>3</sub>                | [M-H]-             | Phenolic acids | 9268   | 13908  | 18269  | 12868   | 9       |

|     |                                                     |                                                               |                    |                |         |         |         |         |         |
|-----|-----------------------------------------------------|---------------------------------------------------------------|--------------------|----------------|---------|---------|---------|---------|---------|
|     | 3-(4-hydroxyphenyl)propionate                       |                                                               |                    |                |         |         |         |         |         |
| 420 | 1-(4-Methoxyphenyl)-1-propanol                      | C <sub>11</sub> H <sub>14</sub> N <sub>2</sub> O <sub>3</sub> | [M-H] <sup>-</sup> | Phenolic acids | 175836  | 235859  | 211272  | 274600  | 250181  |
| 421 | 4-(3,4,5-Trihydroxybenzoxy)benzoic acid             | C <sub>9</sub> H <sub>11</sub> NO <sub>3</sub>                | [M-H] <sup>-</sup> | Phenolic acids | 32512   | 18943   | 19652   | 22096   | 12530   |
| 422 | Methyl caffeate                                     | C <sub>11</sub> H <sub>14</sub> N <sub>2</sub> O <sub>3</sub> | [M-H] <sup>-</sup> | Phenolic acids | 1060416 | 3296663 | 2050132 | 2357285 | 1406816 |
| 423 | p-Coumaric acid ethyl ester                         | C <sub>9</sub> H <sub>11</sub> NO <sub>3</sub>                | [M+H] <sup>+</sup> | Phenolic acids | 32923   | 9       | 9558    | 12173   | 9       |
| 424 | p-Coumaraldehyde                                    | C <sub>11</sub> H <sub>14</sub> N <sub>2</sub> O <sub>3</sub> | [M-H] <sup>-</sup> | Phenolic acids | 5900    | 9282    | 8792    | 11017   | 6031    |
| 425 | 1-Linoleoylglycerol                                 | C <sub>9</sub> H <sub>11</sub> NO <sub>3</sub>                | [M+H] <sup>+</sup> | Lipids         | 448084  | 218366  | 349163  | 382213  | 157271  |
| 426 | 2-Linoleoylglycerol-1-O-glucoside                   | C <sub>11</sub> H <sub>14</sub> N <sub>2</sub> O <sub>3</sub> | [M+H] <sup>+</sup> | Lipids         | 52203   | 49060   | 166084  | 197518  | 10347   |
| 427 | 1- $\alpha$ -Linolenoyl-glycerol                    | C <sub>9</sub> H <sub>11</sub> NO <sub>3</sub>                | [M+H] <sup>+</sup> | Lipids         | 687082  | 180768  | 328139  | 348434  | 118286  |
| 428 | 1- $\alpha$ -Linolenoyl-glycerol-2,3-di-O-glucoside | C <sub>11</sub> H <sub>14</sub> N <sub>2</sub> O <sub>3</sub> | [M+H] <sup>+</sup> | Lipids         | 9       | 10106   | 38488   | 38864   | 11841   |
| 429 | 2-Linoleoylglycerol                                 | C <sub>9</sub> H <sub>11</sub> NO <sub>3</sub>                | [M+H] <sup>+</sup> | Lipids         | 269688  | 258944  | 881819  | 1048264 | 79677   |
| 430 | 1-Oleoyl-Sn-Glycerol                                | C <sub>11</sub> H <sub>14</sub> N <sub>2</sub> O <sub>3</sub> | [M+H] <sup>+</sup> | Lipids         | 9       | 90659   | 439649  | 591301  | 30177   |
| 431 | Monopalmitin                                        | C <sub>9</sub> H <sub>11</sub> NO <sub>3</sub>                | [M+H] <sup>+</sup> | Lipids         | 261241  | 205273  | 204860  | 165822  | 233608  |
| 432 | LysoPG 16:0                                         | C <sub>11</sub> H <sub>14</sub> N <sub>2</sub> O <sub>3</sub> | [M-H] <sup>-</sup> | Lipids         | 48707   | 979800  | 3672012 | 5531398 | 720426  |
| 433 | 1- $\alpha$ -Linolenoyl-glycerol-3-O-glucoside      | C <sub>9</sub> H <sub>11</sub> NO <sub>3</sub>                | [M+H] <sup>+</sup> | Lipids         | 33768   | 33616   | 69497   | 76887   | 33127   |
| 434 | 2- $\alpha$ -Linolenoyl-glycerol-1,3-di-O-glucoside | C <sub>11</sub> H <sub>14</sub> N <sub>2</sub> O <sub>3</sub> | [M+H] <sup>+</sup> | Lipids         | 9       | 46339   | 190288  | 238130  | 13856   |
| 435 | LysoPI 18:3                                         | C <sub>9</sub> H <sub>11</sub> NO <sub>3</sub>                | [M-H] <sup>-</sup> | Lipids         | 1822    | 126249  | 847606  | 851298  | 59761   |
| 436 | 2-Linoleoylglycerol-1,3-di-O-glucoside              | C <sub>11</sub> H <sub>14</sub> N <sub>2</sub> O <sub>3</sub> | [M+H] <sup>+</sup> | Lipids         | 9       | 70564   | 274690  | 302337  | 15653   |
| 437 | 1-Linoleoylglycerol-3-O-glucoside                   | C <sub>9</sub> H <sub>11</sub> NO <sub>3</sub>                | [M+H] <sup>+</sup> | Lipids         | 56216   | 27300   | 59303   | 56827   | 18683   |

|     |                                                    |                                                               |                    |                                |         |         |         |          |         |
|-----|----------------------------------------------------|---------------------------------------------------------------|--------------------|--------------------------------|---------|---------|---------|----------|---------|
| 438 | 2- $\alpha$ -Linolenoyl-glycerol-1-O-g<br>lucoside | C <sub>11</sub> H <sub>14</sub> N <sub>2</sub> O <sub>3</sub> | [M+H] <sup>+</sup> | Lipids                         | 36541   | 61670   | 143042  | 234471   | 14747   |
| 439 | 2- $\alpha$ -Linolenoyl-glycerol                   | C <sub>9</sub> H <sub>11</sub> NO <sub>3</sub>                | [M+H] <sup>+</sup> | Lipids                         | 224168  | 161888  | 843438  | 960462   | 49216   |
| 440 | 1-Linoleoylglycerol-2,3-di-O-g<br>lucoside         | C <sub>11</sub> H <sub>14</sub> N <sub>2</sub> O <sub>3</sub> | [M+H] <sup>+</sup> | Lipids                         | 9       | 13352   | 40510   | 45340    | 12261   |
| 441 | Xanthine                                           | C <sub>9</sub> H <sub>11</sub> NO <sub>3</sub>                | [M-H] <sup>-</sup> | Nucleotides and<br>derivatives | 950566  | 94127   | 647187  | 682245   | 70338   |
| 442 | Inosine                                            | C <sub>11</sub> H <sub>14</sub> N <sub>2</sub> O <sub>3</sub> | [M+H] <sup>+</sup> | Nucleotides and<br>derivatives | 371470  | 841800  | 826155  | 831683   | 590023  |
| 443 | N7-Methylguanosine                                 | C <sub>9</sub> H <sub>11</sub> NO <sub>3</sub>                | [M+H] <sup>+</sup> | Nucleotides and<br>derivatives | 210100  | 621079  | 527603  | 705553   | 131354  |
| 444 | Adenosine                                          | C <sub>11</sub> H <sub>14</sub> N <sub>2</sub> O <sub>3</sub> | [M+H] <sup>+</sup> | Nucleotides and<br>derivatives | 2426337 | 6060508 | 5360156 | 7182351  | 5694521 |
| 445 | 5-Methyluridine                                    | C <sub>9</sub> H <sub>11</sub> NO <sub>3</sub>                | [M-H] <sup>-</sup> | Nucleotides and<br>derivatives | 74918   | 56902   | 52654   | 71508    | 77741   |
| 446 | 2'-O-Methyladenosine                               | C <sub>11</sub> H <sub>14</sub> N <sub>2</sub> O <sub>3</sub> | [M+H] <sup>+</sup> | Nucleotides and<br>derivatives | 3076925 | 2499128 | 2716933 | 4945672  | 1353035 |
| 447 | Thymidine                                          | C <sub>9</sub> H <sub>11</sub> NO <sub>3</sub>                | [M+H] <sup>+</sup> | Nucleotides and<br>derivatives | 6114262 | 8512329 | 5699676 | 9453529  | 4023859 |
| 448 | 2-Deoxyribose-1-phosphate                          | C <sub>11</sub> H <sub>14</sub> N <sub>2</sub> O <sub>3</sub> | [M-H] <sup>-</sup> | Nucleotides and<br>derivatives | 6328826 | 539452  | 6024535 | 12149325 | 302732  |
| 449 | 2'-Deoxyinosine-5'-monophosp<br>hate               | C <sub>9</sub> H <sub>11</sub> NO <sub>3</sub>                | [M+H] <sup>+</sup> | Nucleotides and<br>derivatives | 1485364 | 1461697 | 813469  | 391249   | 739655  |
| 450 | 2-(Dimethylamino)guanosine                         | C <sub>11</sub> H <sub>14</sub> N <sub>2</sub> O <sub>3</sub> | [M+H] <sup>+</sup> | Nucleotides and<br>derivatives | 2030009 | 1495027 | 1797904 | 3270018  | 879929  |
| 451 | 2'-Deoxycytidine                                   | C <sub>9</sub> H <sub>11</sub> NO <sub>3</sub>                | [M+H] <sup>+</sup> | Nucleotides and<br>derivatives | 1744376 | 5672229 | 2739360 | 4517963  | 1818115 |
| 452 | Uridine                                            | C <sub>11</sub> H <sub>14</sub> N <sub>2</sub> O <sub>3</sub> | [M-H] <sup>-</sup> | Nucleotides and                | 2171346 | 3844744 | 1638156 | 2217430  | 1998235 |



|     |                                           |                                                               |                    |                             |         |          |          |          |         |
|-----|-------------------------------------------|---------------------------------------------------------------|--------------------|-----------------------------|---------|----------|----------|----------|---------|
|     |                                           |                                                               |                    | derivatives                 |         |          |          |          |         |
| 453 | Guanine                                   | C <sub>9</sub> H <sub>11</sub> NO <sub>3</sub>                | [M+H] <sup>+</sup> | Nucleotides and derivatives | 5716232 | 8684616  | 4338641  | 4192590  | 438090  |
| 454 | 2'-Deoxyguanosine                         | C <sub>11</sub> H <sub>14</sub> N <sub>2</sub> O <sub>3</sub> | [M+H] <sup>+</sup> | Nucleotides and derivatives | 4451711 | 13119724 | 8873926  | 14808246 | 5301587 |
| 455 | 2-Deoxyribose-5'-phosphate                | C <sub>9</sub> H <sub>11</sub> NO <sub>3</sub>                | [M-H] <sup>-</sup> | Nucleotides and derivatives | 360460  | 35426    | 296263   | 363898   | 14914   |
| 456 | Guanosine 3',5'-cyclic monophosphate      | C <sub>11</sub> H <sub>14</sub> N <sub>2</sub> O <sub>3</sub> | [M-H] <sup>-</sup> | Nucleotides and derivatives | 300335  | 3941855  | 3353093  | 2215893  | 6321024 |
| 457 | 2'-Deoxyinosine                           | C <sub>9</sub> H <sub>11</sub> NO <sub>3</sub>                | [M+H] <sup>+</sup> | Nucleotides and derivatives | 104090  | 241555   | 282876   | 483156   | 9       |
| 458 | Riboflavin 5'-Adenosine Diphosphate       | C <sub>11</sub> H <sub>14</sub> N <sub>2</sub> O <sub>3</sub> | [M-H] <sup>-</sup> | Nucleotides and derivatives | 51702   | 11088    | 8623     | 13219    | 11867   |
| 459 | 5-Aminoimidazole ribonucleotide           | C <sub>9</sub> H <sub>11</sub> NO <sub>3</sub>                | [M+H] <sup>+</sup> | Nucleotides and derivatives | 45576   | 4031875  | 5121468  | 5596949  | 1506892 |
| 460 | Hypoxanthine                              | C <sub>11</sub> H <sub>14</sub> N <sub>2</sub> O <sub>3</sub> | [M+H] <sup>+</sup> | Nucleotides and derivatives | 1220120 | 287220   | 652457   | 447640   | 27690   |
| 461 | Vidarabine                                | C <sub>9</sub> H <sub>11</sub> NO <sub>3</sub>                | [M+H] <sup>+</sup> | Nucleotides and derivatives | 2472369 | 5953245  | 5574395  | 6612119  | 5630001 |
| 462 | 5'-Deoxy-5'-(methylthio)adenosine         | C <sub>11</sub> H <sub>14</sub> N <sub>2</sub> O <sub>3</sub> | [M+H] <sup>+</sup> | Nucleotides and derivatives | 2138981 | 641736   | 2493164  | 1395159  | 842331  |
| 463 | Cytarabine                                | C <sub>9</sub> H <sub>11</sub> NO <sub>3</sub>                | [M+H] <sup>+</sup> | Nucleotides and derivatives | 7336664 | 26175109 | 15165352 | 21523634 | 9577772 |
| 464 | Cytidine 5'-monophosphate(Cytidylic acid) | C <sub>11</sub> H <sub>14</sub> N <sub>2</sub> O <sub>3</sub> | [M+H] <sup>+</sup> | Nucleotides and derivatives | 51189   | 415452   | 607294   | 666684   | 214360  |
| 465 | 5-Methylcytosine                          | C <sub>9</sub> H <sub>11</sub> NO <sub>3</sub>                | [M+H] <sup>+</sup> | Nucleotides and derivatives | 191123  | 401698   | 261576   | 464430   | 150763  |

|     |                                 |                                                               |                    |                             |          |          |          |          |         |
|-----|---------------------------------|---------------------------------------------------------------|--------------------|-----------------------------|----------|----------|----------|----------|---------|
| 466 | 1-beta-D-Arabinofuranosyluracil | C <sub>11</sub> H <sub>14</sub> N <sub>2</sub> O <sub>3</sub> | [M+H] <sup>+</sup> | Nucleotides and derivatives | 2010148  | 4220243  | 2659538  | 2868612  | 1528813 |
| 467 | 8-Hydroxyguanosine              | C <sub>9</sub> H <sub>11</sub> NO <sub>3</sub>                | [M-H] <sup>-</sup> | Nucleotides and derivatives | 17107    | 32756    | 56616    | 82004    | 9       |
| 468 | Isoguanine                      | C <sub>11</sub> H <sub>14</sub> N <sub>2</sub> O <sub>3</sub> | [M+H] <sup>+</sup> | Nucleotides and derivatives | 1266934  | 2262758  | 1190280  | 1245755  | 233918  |
| 469 | 2'-Deoxyadenosine               | C <sub>9</sub> H <sub>11</sub> NO <sub>3</sub>                | [M+H] <sup>+</sup> | Nucleotides and derivatives | 715391   | 2392983  | 1640996  | 3009952  | 1685596 |
| 470 | 2-Aminopurine                   | C <sub>11</sub> H <sub>14</sub> N <sub>2</sub> O <sub>3</sub> | [M+H] <sup>+</sup> | Nucleotides and derivatives | 595922   | 1544471  | 1231658  | 1746666  | 1129249 |
| 471 | 9-(Arabinosyl)hypoxanthine      | C <sub>9</sub> H <sub>11</sub> NO <sub>3</sub>                | [M-H] <sup>-</sup> | Nucleotides and derivatives | 683150   | 1366853  | 872485   | 1395229  | 305183  |
| 472 | Adenine                         | C <sub>11</sub> H <sub>14</sub> N <sub>2</sub> O <sub>3</sub> | [M+H] <sup>+</sup> | Nucleotides and derivatives | 18589251 | 25439420 | 11204931 | 15439381 | 2967635 |
| 473 | 5-Methyl-2'-Deoxycytidine       | C <sub>9</sub> H <sub>11</sub> NO <sub>3</sub>                | [M+H] <sup>+</sup> | Nucleotides and derivatives | 1703689  | 3551809  | 2660289  | 4078003  | 1413383 |
| 474 | 2'-Deoxyuridine                 | C <sub>11</sub> H <sub>14</sub> N <sub>2</sub> O <sub>3</sub> | [M-H] <sup>-</sup> | Nucleotides and derivatives | 82176    | 15187    | 32631    | 66826    | 9344    |
| 475 | 6-O-methylguanine               | C <sub>9</sub> H <sub>11</sub> NO <sub>3</sub>                | [M+H] <sup>+</sup> | Nucleotides and derivatives | 219488   | 134429   | 149395   | 163863   | 54431   |
| 476 | β-Pseudouridine                 | C <sub>11</sub> H <sub>14</sub> N <sub>2</sub> O <sub>3</sub> | [M-H] <sup>-</sup> | Nucleotides and derivatives | 348413   | 263784   | 263128   | 338428   | 213679  |
| 477 | Isocytosine                     | C <sub>9</sub> H <sub>11</sub> NO <sub>3</sub>                | [M+H] <sup>+</sup> | Nucleotides and derivatives | 76163    | 64655    | 83472    | 137560   | 129757  |
| 478 | Succinyladenosine               | C <sub>11</sub> H <sub>14</sub> N <sub>2</sub> O <sub>3</sub> | [M+H] <sup>+</sup> | Nucleotides and derivatives | 3622002  | 662188   | 1639401  | 2616313  | 514717  |
| 479 | N6-methyladenosine              | C <sub>9</sub> H <sub>11</sub> NO <sub>3</sub>                | [M+H] <sup>+</sup> | Nucleotides and derivatives | 509612   | 1929552  | 1757278  | 2047595  | 2007363 |

|     |                                          |                                                               |                    |                             |         |         |         |         |         |
|-----|------------------------------------------|---------------------------------------------------------------|--------------------|-----------------------------|---------|---------|---------|---------|---------|
| 480 | 8-Hydroxy-2-deoxyguanosine               | C <sub>11</sub> H <sub>14</sub> N <sub>2</sub> O <sub>3</sub> | [M+H] <sup>+</sup> | Nucleotides and derivatives | 9254    | 11384   | 19750   | 35333   | 9       |
| 481 | Xanthosine                               | C <sub>9</sub> H <sub>11</sub> NO <sub>3</sub>                | [M-H] <sup>-</sup> | Nucleotides and derivatives | 1109939 | 695168  | 435447  | 694296  | 904291  |
| 482 | Guanosine                                | C <sub>11</sub> H <sub>14</sub> N <sub>2</sub> O <sub>3</sub> | [M+H] <sup>+</sup> | Nucleotides and derivatives | 2372817 | 8298928 | 7010890 | 8789625 | 5173419 |
| 483 | Guanosine 5'-monophosphate               | C <sub>9</sub> H <sub>11</sub> NO <sub>3</sub>                | [M+H] <sup>+</sup> | Nucleotides and derivatives | 25453   | 411705  | 459231  | 418538  | 197716  |
| 484 | 8-Azaguanine                             | C <sub>11</sub> H <sub>14</sub> N <sub>2</sub> O <sub>3</sub> | [M+H] <sup>+</sup> | Nucleotides and derivatives | 1020912 | 741985  | 685372  | 594389  | 50085   |
| 485 | Riboprime                                | C <sub>9</sub> H <sub>11</sub> NO <sub>3</sub>                | [M+H] <sup>+</sup> | Nucleotides and derivatives | 19518   | 24646   | 34633   | 39267   | 37587   |
| 486 | Allopurinol                              | C <sub>11</sub> H <sub>14</sub> N <sub>2</sub> O <sub>3</sub> | [M+H] <sup>+</sup> | Nucleotides and derivatives | 1370904 | 289971  | 722025  | 495131  | 25491   |
| 487 | Uridine-5'-Diphosphate-D-Xylose          | C <sub>9</sub> H <sub>11</sub> NO <sub>3</sub>                | [M-H] <sup>-</sup> | Nucleotides and derivatives | 4377    | 84242   | 60442   | 45042   | 19973   |
| 488 | Cytosine                                 | C <sub>11</sub> H <sub>14</sub> N <sub>2</sub> O <sub>3</sub> | [M+H] <sup>+</sup> | Nucleotides and derivatives | 1044471 | 5035435 | 2741628 | 3897709 | 1833203 |
| 489 | Uridine 5'-diphospho-D-glucose           | C <sub>9</sub> H <sub>11</sub> NO <sub>3</sub>                | [M-H] <sup>-</sup> | Nucleotides and derivatives | 117377  | 964950  | 733635  | 602446  | 403369  |
| 490 | Ribosyladenosine                         | C <sub>11</sub> H <sub>14</sub> N <sub>2</sub> O <sub>3</sub> | [M+H] <sup>+</sup> | Nucleotides and derivatives | 138641  | 135129  | 141551  | 135479  | 94735   |
| 491 | Uridine 5'-diphospho-N-acetylglucosamine | C <sub>9</sub> H <sub>11</sub> NO <sub>3</sub>                | [M-H] <sup>-</sup> | Nucleotides and derivatives | 76962   | 40010   | 53141   | 72617   | 51528   |
| 492 | Uridine 5'-monophosphate                 | C <sub>11</sub> H <sub>14</sub> N <sub>2</sub> O <sub>3</sub> | [M-H] <sup>-</sup> | Nucleotides and derivatives | 34230   | 298915  | 2921292 | 4379421 | 454333  |
| 493 | Thymine                                  | C <sub>9</sub> H <sub>11</sub> NO <sub>3</sub>                | [M+H] <sup>+</sup> | Nucleotides and             | 139421  | 16837   | 196755  | 565873  | 20093   |

|     |                                            |                                                               |                    |                             |          |          |          |          |          |
|-----|--------------------------------------------|---------------------------------------------------------------|--------------------|-----------------------------|----------|----------|----------|----------|----------|
|     |                                            |                                                               |                    | derivatives                 |          |          |          |          |          |
| 494 | Cyclic 3',5'-Adenylic acid                 | C <sub>11</sub> H <sub>14</sub> N <sub>2</sub> O <sub>3</sub> | [M-H] <sup>-</sup> | Nucleotides and derivatives | 254414   | 759497   | 619729   | 716541   | 693070   |
| 495 | Flavin Single Nucleotide(FMN)              | C <sub>9</sub> H <sub>11</sub> NO <sub>3</sub>                | [M-H] <sup>-</sup> | Nucleotides and derivatives | 34827    | 142748   | 115862   | 118262   | 64155    |
| 496 | Cytidine                                   | C <sub>11</sub> H <sub>14</sub> N <sub>2</sub> O <sub>3</sub> | [M+H] <sup>+</sup> | Nucleotides and derivatives | 10217531 | 42801103 | 25627985 | 32049594 | 16182329 |
| 497 | Adenosine 5'-monophosphate                 | C <sub>9</sub> H <sub>11</sub> NO <sub>3</sub>                | [M+H] <sup>+</sup> | Nucleotides and derivatives | 16478    | 531642   | 747442   | 231566   | 806878   |
| 498 | 1-Methylxanthine                           | C <sub>11</sub> H <sub>14</sub> N <sub>2</sub> O <sub>3</sub> | [M+H] <sup>+</sup> | Nucleotides and derivatives | 25559    | 9        | 5967     | 13967    | 9        |
| 499 | Adenosine 5'-diphosphate                   | C <sub>9</sub> H <sub>11</sub> NO <sub>3</sub>                | [M-H] <sup>-</sup> | Nucleotides and derivatives | 2657     | 11109    | 24152    | 11092    | 48262    |
| 500 | 1-Methyladenosine                          | C <sub>11</sub> H <sub>14</sub> N <sub>2</sub> O <sub>3</sub> | [M-H] <sup>-</sup> | Nucleotides and derivatives | 9        | 33355    | 27527    | 40139    | 45790    |
| 501 | β-Nicotinamide mononucleotide              | C <sub>9</sub> H <sub>11</sub> NO <sub>3</sub>                | [M+H] <sup>+</sup> | Nucleotides and derivatives | 9        | 27070    | 57744    | 23153    | 9        |
| 502 | Uridine-5'-diphosphoglucuronic acid        | C <sub>11</sub> H <sub>14</sub> N <sub>2</sub> O <sub>3</sub> | [M-H] <sup>-</sup> | Nucleotides and derivatives | 9        | 7125     | 8093     | 7055     | 4485     |
| 503 | 4'-O-Glucosylvitexin                       | C <sub>9</sub> H <sub>11</sub> NO <sub>3</sub>                | [M+H] <sup>+</sup> | Flavonoids                  | 49092    | 735498   | 9        | 144463   | 655805   |
| 504 | 3,5,6,7,8,4'-Hexamethoxyflavone            | C <sub>11</sub> H <sub>14</sub> N <sub>2</sub> O <sub>3</sub> | [M+H] <sup>+</sup> | Flavonoids                  | 127707   | 285270   | 197940   | 281335   | 757014   |
|     | Tricin                                     |                                                               |                    |                             |          |          |          |          |          |
| 505 | (5,7,4'-Trihydroxy-3',5'-dimethoxyflavone) | C <sub>9</sub> H <sub>11</sub> NO <sub>3</sub>                | [M+H] <sup>+</sup> | Flavonoids                  | 265353   | 205353   | 227225   | 244531   | 214673   |
|     | Hispidulin                                 |                                                               |                    |                             |          |          |          |          |          |
| 506 | (5,7,4'-Trihydroxy-6-methoxyflavone)*      | C <sub>11</sub> H <sub>14</sub> N <sub>2</sub> O <sub>3</sub> | [M+H] <sup>+</sup> | Flavonoids                  | 47732    | 81673    | 55824    | 53954    | 73951    |

|     |                                                      |                                                               |                    |            |         |         |         |         |         |
|-----|------------------------------------------------------|---------------------------------------------------------------|--------------------|------------|---------|---------|---------|---------|---------|
| 507 | 5,7,8,4'-Tetramethoxyflavone                         | C <sub>9</sub> H <sub>11</sub> NO <sub>3</sub>                | [M+H] <sup>+</sup> | Flavonoids | 9073    | 22978   | 11207   | 20310   | 49481   |
| 508 | Hispidulin-7-O-glucoside(Homoplantagin)*             | C <sub>11</sub> H <sub>14</sub> N <sub>2</sub> O <sub>3</sub> | [M+H] <sup>+</sup> | Flavonoids | 950860  | 1222578 | 936352  | 911674  | 897280  |
| 509 | Apigenin-5-O-glucoside                               | C <sub>9</sub> H <sub>11</sub> NO <sub>3</sub>                | [M+H] <sup>+</sup> | Flavonoids | 38374   | 38621   | 41519   | 37259   | 29842   |
| 510 | 5-Hydroxy-3,7,3',4'-tetramethoxyflavone (Retusin)    | C <sub>11</sub> H <sub>14</sub> N <sub>2</sub> O <sub>3</sub> | [M+H] <sup>+</sup> | Flavonoids | 13359   | 6750    | 4844    | 3655    | 12360   |
| 511 | Vitexin-2"-O-glucoside                               | C <sub>9</sub> H <sub>11</sub> NO <sub>3</sub>                | [M+H] <sup>+</sup> | Flavonoids | 4481498 | 4340175 | 3250809 | 3761823 | 2857024 |
| 512 | Diosmetin-7-O-galactoside*                           | C <sub>11</sub> H <sub>14</sub> N <sub>2</sub> O <sub>3</sub> | [M+H] <sup>+</sup> | Flavonoids | 809694  | 1012675 | 727283  | 777358  | 811284  |
| 513 | Isovitexin-2"-O-rhamnoside                           | C <sub>9</sub> H <sub>11</sub> NO <sub>3</sub>                | [M+H] <sup>+</sup> | Flavonoids | 438593  | 627979  | 524273  | 403823  | 421244  |
| 514 | Orientin-7-O-glucoside                               | C <sub>11</sub> H <sub>14</sub> N <sub>2</sub> O <sub>3</sub> | [M+H] <sup>+</sup> | Flavonoids | 2077003 | 1298667 | 1592032 | 1781654 | 1873561 |
| 515 | Acacetin                                             | C <sub>9</sub> H <sub>11</sub> NO <sub>3</sub>                | [M+H] <sup>+</sup> | Flavonoids | 1932118 | 3989911 | 3665863 | 3767308 | 2399573 |
| 516 | Isosaponarin(Isovitexin-4'-O-glucoside)              | C <sub>11</sub> H <sub>14</sub> N <sub>2</sub> O <sub>3</sub> | [M+H] <sup>+</sup> | Flavonoids | 22225   | 319098  | 23208   | 56498   | 301007  |
| 517 | Luteolin-6-C-(5"-glucuronyl)xylloside                | C <sub>9</sub> H <sub>11</sub> NO <sub>3</sub>                | [M+H] <sup>+</sup> | Flavonoids | 213752  | 211056  | 194386  | 219274  | 204266  |
| 518 | Chrysoeriol-6,8-di-C-glucoside                       | C <sub>11</sub> H <sub>14</sub> N <sub>2</sub> O <sub>3</sub> | [M+H] <sup>+</sup> | Flavonoids | 1232054 | 1443484 | 1103161 | 1009460 | 877054  |
| 519 | 3,5,7,2'-Tetrahydroxyflavone; Datisacetin            | C <sub>9</sub> H <sub>11</sub> NO <sub>3</sub>                | [M-H] <sup>-</sup> | Flavonoids | 24215   | 81773   | 63202   | 42077   | 44901   |
| 520 | Luteolin-7-O-neohesperidoside (Lonicerin)*           | C <sub>11</sub> H <sub>14</sub> N <sub>2</sub> O <sub>3</sub> | [M+H] <sup>+</sup> | Flavonoids | 3703597 | 1879224 | 1518329 | 2238603 | 2817032 |
| 521 | 3,4'-Dihydroxyflavone                                | C <sub>9</sub> H <sub>11</sub> NO <sub>3</sub>                | [M+H] <sup>+</sup> | Flavonoids | 9       | 9192    | 13697   | 27083   | 34503   |
| 522 | Chrysoeriol-8-C-glucoside-7-O-(6"-feruloyl)glucoside | C <sub>11</sub> H <sub>14</sub> N <sub>2</sub> O <sub>3</sub> | [M+H] <sup>+</sup> | Flavonoids | 178183  | 161338  | 129276  | 138810  | 184903  |
| 523 | 6,7,8-Tetrahydroxy-5-methoxyflavone*                 | C <sub>9</sub> H <sub>11</sub> NO <sub>3</sub>                | [M+H] <sup>+</sup> | Flavonoids | 43219   | 89403   | 73624   | 64376   | 89159   |
| 524 | Vitexin-2"-O-rhamnoside                              | C <sub>11</sub> H <sub>14</sub> N <sub>2</sub> O <sub>3</sub> | [M+H] <sup>+</sup> | Flavonoids | 593951  | 889292  | 739156  | 648210  | 581505  |
| 525 | Diosmetin-7-O-glucoside*                             | C <sub>9</sub> H <sub>11</sub> NO <sub>3</sub>                | [M+H] <sup>+</sup> | Flavonoids | 928395  | 1111640 | 801078  | 856861  | 820568  |
| 526 | Violanthin                                           | C <sub>11</sub> H <sub>14</sub> N <sub>2</sub> O <sub>3</sub> | [M+H] <sup>+</sup> | Flavonoids | 6493811 | 9207636 | 7246576 | 6669843 | 6069286 |

|     |                                                     |                                                               |                    |            |          |          |          |          |          |
|-----|-----------------------------------------------------|---------------------------------------------------------------|--------------------|------------|----------|----------|----------|----------|----------|
| 527 | Chrysoeriol-8-C-glucoside<br>(Scoparin)             | C <sub>9</sub> H <sub>11</sub> NO <sub>3</sub>                | [M+H] <sup>+</sup> | Flavonoids | 205627   | 281399   | 202478   | 191376   | 174133   |
| 528 | 5,6,7-Tetrahydroxy-8-methoxy<br>flavone*            | C <sub>11</sub> H <sub>14</sub> N <sub>2</sub> O <sub>3</sub> | [M+H] <sup>+</sup> | Flavonoids | 25462    | 38490    | 27338    | 25528    | 13996    |
| 529 | Tangeretin<br>(4',5,6,7,8-Pentamethoxyflavone)      | C <sub>9</sub> H <sub>11</sub> NO <sub>3</sub>                | [M+H] <sup>+</sup> | Flavonoids | 267176   | 316295   | 206709   | 279325   | 958161   |
| 530 | Ayanin<br>(3',5-Dihydroxy-3,4',7-Trimethoxyflavone) | C <sub>11</sub> H <sub>14</sub> N <sub>2</sub> O <sub>3</sub> | [M+H] <sup>+</sup> | Flavonoids | 41003    | 31733    | 34200    | 33067    | 61009    |
| 531 | 3,5,7,3'4'-Pentamethoxyflavone                      | C <sub>9</sub> H <sub>11</sub> NO <sub>3</sub>                | [M+H] <sup>+</sup> | Flavonoids | 3081     | 14559    | 11125    | 18117    | 52071    |
| 532 | 5-Hydroxy-6,7,8,3',4'-pentamethoxyflavone           | C <sub>11</sub> H <sub>14</sub> N <sub>2</sub> O <sub>3</sub> | [M+H] <sup>+</sup> | Flavonoids | 14402    | 11833    | 10706    | 12186    | 14503    |
| 533 | 5,6,7,4'-Tetramethoxyflavone                        | C <sub>9</sub> H <sub>11</sub> NO <sub>3</sub>                | [M+H] <sup>+</sup> | Flavonoids | 9193     | 26093    | 21566    | 29863    | 67383    |
| 534 | Tricin-7-O-Glucoside                                | C <sub>11</sub> H <sub>14</sub> N <sub>2</sub> O <sub>3</sub> | [M+H] <sup>+</sup> | Flavonoids | 736611   | 841645   | 628726   | 691776   | 811795   |
| 535 | Apigenin-6-C-(2"-xylosyl)glucoside*                 | C <sub>9</sub> H <sub>11</sub> NO <sub>3</sub>                | [M+H] <sup>+</sup> | Flavonoids | 2303975  | 1357836  | 1139426  | 1428587  | 1484779  |
| 536 | Apigenin-8-C-(2"-xylosyl)glucoside*                 | C <sub>11</sub> H <sub>14</sub> N <sub>2</sub> O <sub>3</sub> | [M+H] <sup>+</sup> | Flavonoids | 2303975  | 1357836  | 1139426  | 1428587  | 1484779  |
| 537 | Apigenin-6,8-di-C-glucoside<br>(Vicenin-2)          | C <sub>9</sub> H <sub>11</sub> NO <sub>3</sub>                | [M+H] <sup>+</sup> | Flavonoids | 23053409 | 21411518 | 18998534 | 18856316 | 16278507 |
| 538 | 5,7,3',5'-tetrahydroxy-6-methylfavanone             | C <sub>11</sub> H <sub>14</sub> N <sub>2</sub> O <sub>3</sub> | [M+H] <sup>+</sup> | Flavonoids | 47233    | 82252    | 64507    | 60982    | 82300    |
| 539 | Apigenin-6,8-di-C-arabinoside*                      | C <sub>9</sub> H <sub>11</sub> NO <sub>3</sub>                | [M+H] <sup>+</sup> | Flavonoids | 103955   | 70807    | 42146    | 91378    | 143480   |
| 540 | Diosmetin<br>(5,7,3'-Trihydroxy-4'-methoxyf         | C <sub>11</sub> H <sub>14</sub> N <sub>2</sub> O <sub>3</sub> | [M+H] <sup>+</sup> | Flavonoids | 47974    | 75219    | 65382    | 51763    | 77568    |

|     |                                                      |                                                               |                    |            |          |          |          |          |          |
|-----|------------------------------------------------------|---------------------------------------------------------------|--------------------|------------|----------|----------|----------|----------|----------|
|     | lavone)*                                             |                                                               |                    |            |          |          |          |          |          |
|     | Nobiletin                                            |                                                               |                    |            |          |          |          |          |          |
| 541 | (5,6,7,8,3',4'-Hexamethoxyflavone)                   | C <sub>9</sub> H <sub>11</sub> NO <sub>3</sub>                | [M+H] <sup>+</sup> | Flavonoids | 129247   | 295778   | 200009   | 280324   | 781473   |
| 542 | Chrysoeriol-7-O-rutinoside                           | C <sub>11</sub> H <sub>14</sub> N <sub>2</sub> O <sub>3</sub> | [M-H] <sup>-</sup> | Flavonoids | 3016881  | 2473923  | 2252607  | 2535229  | 2471669  |
| 543 | Apigenin-6-C-(2"-glucuronyl)xyloside                 | C <sub>9</sub> H <sub>11</sub> NO <sub>3</sub>                | [M+H] <sup>+</sup> | Flavonoids | 206947   | 286121   | 226330   | 194645   | 206397   |
| 544 | Apigenin-6-C-(2"-glucosyl)arabinoside                | C <sub>11</sub> H <sub>14</sub> N <sub>2</sub> O <sub>3</sub> | [M+H] <sup>+</sup> | Flavonoids | 33320479 | 20970576 | 16235395 | 26121424 | 22763875 |
| 545 | 5-Hydroxy-3,7,4'-trimethoxyflavone                   | C <sub>9</sub> H <sub>11</sub> NO <sub>3</sub>                | [M+H] <sup>+</sup> | Flavonoids | 42724    | 43147    | 36556    | 10899    | 50582    |
| 546 | Luteolin-6-C-(2"-glucuronyl)glucoside                | C <sub>11</sub> H <sub>14</sub> N <sub>2</sub> O <sub>3</sub> | [M+H] <sup>+</sup> | Flavonoids | 446075   | 565397   | 398174   | 345489   | 324782   |
| 547 | 4',5,7-Trihydroxy-3',6-dimethoxyflavone (Jaceosidin) | C <sub>9</sub> H <sub>11</sub> NO <sub>3</sub>                | [M+H] <sup>+</sup> | Flavonoids | 137308   | 120103   | 123929   | 144919   | 99548    |
| 548 | Apiin                                                | C <sub>11</sub> H <sub>14</sub> N <sub>2</sub> O <sub>3</sub> | [M+H] <sup>+</sup> | Flavonoids | 108178   | 57174    | 9        | 70779    | 199599   |
| 549 | Vitexin-2"-O-xyloside                                | C <sub>9</sub> H <sub>11</sub> NO <sub>3</sub>                | [M+H] <sup>+</sup> | Flavonoids | 979203   | 667835   | 506857   | 891075   | 700556   |
| 550 | Isovitexin-2"-O-xyloside*                            | C <sub>11</sub> H <sub>14</sub> N <sub>2</sub> O <sub>3</sub> | [M+H] <sup>+</sup> | Flavonoids | 1262293  | 814066   | 663589   | 1096427  | 856804   |
| 551 | 4',5-Dihydroxy-3,3',7-Trimethoxyflavone; Pachypodol  | C <sub>9</sub> H <sub>11</sub> NO <sub>3</sub>                | [M+H] <sup>+</sup> | Flavonoids | 46682    | 34413    | 36278    | 37917    | 59818    |
| 552 | Isovitexin-7-O-glucoside(Sapoinarin)                 | C <sub>11</sub> H <sub>14</sub> N <sub>2</sub> O <sub>3</sub> | [M-H] <sup>-</sup> | Flavonoids | 449476   | 428766   | 377290   | 407265   | 362999   |
| 553 | Apigenin-4'-O-glucoside*                             | C <sub>9</sub> H <sub>11</sub> NO <sub>3</sub>                | [M+H] <sup>+</sup> | Flavonoids | 122592   | 106504   | 87899    | 95925    | 93698    |
| 554 | Vitexin-7-O-(6"-feruloyl)glucoside                   | C <sub>11</sub> H <sub>14</sub> N <sub>2</sub> O <sub>3</sub> | [M+H] <sup>+</sup> | Flavonoids | 395234   | 250126   | 231423   | 280050   | 278803   |
| 555 | Chrysoeriol-5-O-glucoside                            | C <sub>9</sub> H <sub>11</sub> NO <sub>3</sub>                | [M-H] <sup>-</sup> | Flavonoids | 304408   | 234063   | 378872   | 512327   | 311824   |
| 556 | Vitexin-7-O-(6"-p-coumaroyl)glucoside                | C <sub>11</sub> H <sub>14</sub> N <sub>2</sub> O <sub>3</sub> | [M+H] <sup>+</sup> | Flavonoids | 41127    | 34790    | 26320    | 23482    | 29526    |

|     |                                              |                                                               |                    |            |         |         |         |         |         |
|-----|----------------------------------------------|---------------------------------------------------------------|--------------------|------------|---------|---------|---------|---------|---------|
| 557 | Luteolin-7-O-glucoside<br>(Cynaroside)*      | C <sub>9</sub> H <sub>11</sub> NO <sub>3</sub>                | [M+H] <sup>+</sup> | Flavonoids | 282815  | 214420  | 136962  | 234283  | 275805  |
| 558 | Chrysoeriol-5,7-di-O-glucoside               | C <sub>11</sub> H <sub>14</sub> N <sub>2</sub> O <sub>3</sub> | [M+H] <sup>+</sup> | Flavonoids | 26516   | 26234   | 22825   | 14513   | 17585   |
| 559 | Luteolin<br>(5,7,3',4'-Tetrahydroxyflavone)  | C <sub>9</sub> H <sub>11</sub> NO <sub>3</sub>                | [M-H] <sup>-</sup> | Flavonoids | 10391   | 19086   | 16066   | 16411   | 15746   |
| 560 | Tricin-7-O-(6"-O-malonyl)glucoside           | C <sub>11</sub> H <sub>14</sub> N <sub>2</sub> O <sub>3</sub> | [M+H] <sup>+</sup> | Flavonoids | 68591   | 73883   | 42126   | 42610   | 43014   |
| 561 | Acacetin-7-O-rutinoside<br>(Linarin)         | C <sub>9</sub> H <sub>11</sub> NO <sub>3</sub>                | [M+H] <sup>+</sup> | Flavonoids | 6392    | 8472    | 9361    | 49192   | 6848    |
| 562 | Isoschaftoside                               | C <sub>11</sub> H <sub>14</sub> N <sub>2</sub> O <sub>3</sub> | [M+H] <sup>+</sup> | Flavonoids | 4789189 | 3186333 | 2546585 | 4430727 | 3679074 |
| 563 | Apigenin-8-C-(2"-glucosyl)arabinoside        | C <sub>9</sub> H <sub>11</sub> NO <sub>3</sub>                | [M+H] <sup>+</sup> | Flavonoids | 8815607 | 5294750 | 4532083 | 6842746 | 5868450 |
| 564 | Luteolin-8-C-arabinoside                     | C <sub>11</sub> H <sub>14</sub> N <sub>2</sub> O <sub>3</sub> | [M+H] <sup>+</sup> | Flavonoids | 97911   | 139175  | 170799  | 131414  | 139132  |
| 565 | Luteolin-6,8-di-C-glucoside*                 | C <sub>9</sub> H <sub>11</sub> NO <sub>3</sub>                | [M+H] <sup>+</sup> | Flavonoids | 151943  | 150237  | 125815  | 117957  | 124924  |
| 566 | Apigenin-7,4'-dimethyl ether                 | C <sub>11</sub> H <sub>14</sub> N <sub>2</sub> O <sub>3</sub> | [M+H] <sup>+</sup> | Flavonoids | 6516    | 10055   | 5796    | 4438    | 13820   |
| 567 | Luteolin-3'-O-glucoside*                     | C <sub>9</sub> H <sub>11</sub> NO <sub>3</sub>                | [M+H] <sup>+</sup> | Flavonoids | 113956  | 271432  | 281157  | 220154  | 134084  |
| 568 | Apigenin-8-C-Glucoside<br>(Vitexin)*         | C <sub>11</sub> H <sub>14</sub> N <sub>2</sub> O <sub>3</sub> | [M-H] <sup>-</sup> | Flavonoids | 2246139 | 2206853 | 2330964 | 2629430 | 2312256 |
| 569 | Luteolin-6-C-glucoside<br>(Isoorientin)*     | C <sub>9</sub> H <sub>11</sub> NO <sub>3</sub>                | [M+H] <sup>+</sup> | Flavonoids | 31218   | 50739   | 50346   | 31574   | 41383   |
| 570 | Luteolin-7-O-rutinoside*                     | C <sub>11</sub> H <sub>14</sub> N <sub>2</sub> O <sub>3</sub> | [M+H] <sup>+</sup> | Flavonoids | 2805263 | 1344928 | 1110044 | 1858586 | 2146473 |
| 571 | 3',4',5',5,7-Pentamethoxyflavone             | C <sub>9</sub> H <sub>11</sub> NO <sub>3</sub>                | [M+H] <sup>+</sup> | Flavonoids | 3725    | 13719   | 7022    | 14074   | 39333   |
| 572 | Apigenin-7-O-glucoside(Cosmosiin)*           | C <sub>11</sub> H <sub>14</sub> N <sub>2</sub> O <sub>3</sub> | [M+H] <sup>+</sup> | Flavonoids | 114268  | 106781  | 93722   | 95627   | 99536   |
| 573 | Sinensetin<br>(5,6,7,3',4'-pentamethoxyflavo | C <sub>9</sub> H <sub>11</sub> NO <sub>3</sub>                | [M+H] <sup>+</sup> | Flavonoids | 2828    | 17675   | 15431   | 21421   | 58701   |



|     |                                            |                                                               |                    |            |         |         |         |         |         |
|-----|--------------------------------------------|---------------------------------------------------------------|--------------------|------------|---------|---------|---------|---------|---------|
|     | ne)                                        |                                                               |                    |            |         |         |         |         |         |
| 574 | Hispidulin-7-O-(6"-O-p-Coumaroyl)Glucoside | C <sub>11</sub> H <sub>14</sub> N <sub>2</sub> O <sub>3</sub> | [M+H] <sup>+</sup> | Flavonoids | 9180    | 5326    | 6177    | 24054   | 9412    |
| 575 | 5,7,8-Tetrahydroxy-6-methoxy flavone*      | C <sub>9</sub> H <sub>11</sub> NO <sub>3</sub>                | [M+H] <sup>+</sup> | Flavonoids | 16170   | 32180   | 26131   | 21033   | 13903   |
| 576 | Apigenin-6-C-glucoside (Isovitexin)*       | C <sub>11</sub> H <sub>14</sub> N <sub>2</sub> O <sub>3</sub> | [M-H] <sup>-</sup> | Flavonoids | 2018751 | 1823001 | 1956014 | 2263337 | 1987911 |
| 577 | Schaftoside                                | C <sub>9</sub> H <sub>11</sub> NO <sub>3</sub>                | [M+H] <sup>+</sup> | Flavonoids | 63873   | 35941   | 30020   | 39918   | 27764   |
| 578 | Isovitexin-2"-O-(6"-p-coumaroyl)glucoside  | C <sub>11</sub> H <sub>14</sub> N <sub>2</sub> O <sub>3</sub> | [M+H] <sup>+</sup> | Flavonoids | 24864   | 8564    | 7259    | 17478   | 13927   |
| 579 | 5,6,7,3',4',5'-hexanmethoxyflavone         | C <sub>9</sub> H <sub>11</sub> NO <sub>3</sub>                | [M-H] <sup>-</sup> | Flavonoids | 62519   | 369428  | 263362  | 231354  | 197975  |
| 580 | Apigenin; 4',5,7-Trihydroxyflavone         | C <sub>11</sub> H <sub>14</sub> N <sub>2</sub> O <sub>3</sub> | [M+H] <sup>+</sup> | Flavonoids | 22252   | 46481   | 44039   | 52017   | 40123   |
| 581 | Vitexin-7-O-rutinoside                     | C <sub>9</sub> H <sub>11</sub> NO <sub>3</sub>                | [M-H] <sup>-</sup> | Flavonoids | 73749   | 35233   | 26719   | 55548   | 58227   |
| 582 | Acacetin-7-O-glucuronide                   | C <sub>11</sub> H <sub>14</sub> N <sub>2</sub> O <sub>3</sub> | [M+H] <sup>+</sup> | Flavonoids | 4315    | 8668    | 7729    | 9453    | 8723    |
| 583 | Chrysoeriol-7-O-(6"-malonyl)glucoside      | C <sub>9</sub> H <sub>11</sub> NO <sub>3</sub>                | [M+H] <sup>+</sup> | Flavonoids | 50916   | 36693   | 38570   | 27269   | 22042   |
| 584 | Apigenin-6-C-arabinoside-8-C-xyloside*     | C <sub>11</sub> H <sub>14</sub> N <sub>2</sub> O <sub>3</sub> | [M+H] <sup>+</sup> | Flavonoids | 97990   | 77764   | 41456   | 85726   | 120562  |
| 585 | Apigenin-7-O-neohesperidoside (Rhoifolin)  | C <sub>9</sub> H <sub>11</sub> NO <sub>3</sub>                | [M+H] <sup>+</sup> | Flavonoids | 17290   | 10828   | 7073    | 13488   | 9088    |
| 586 | Luteolin-8-C-glucoside (Orientin)*         | C <sub>11</sub> H <sub>14</sub> N <sub>2</sub> O <sub>3</sub> | [M+H] <sup>+</sup> | Flavonoids | 28915   | 51365   | 45702   | 47334   | 45386   |
| 587 | 5,7-Dihydroxy-3',4',5'-trimethoxyflavone   | C <sub>9</sub> H <sub>11</sub> NO <sub>3</sub>                | [M+H] <sup>+</sup> | Flavonoids | 7978    | 21296   | 19959   | 17418   | 12735   |
| 588 | Luteolin-4'-O-glucoside*                   | C <sub>11</sub> H <sub>14</sub> N <sub>2</sub> O <sub>3</sub> | [M+H] <sup>+</sup> | Flavonoids | 114436  | 67725   | 94148   | 136267  | 83530   |
| 589 | 3'-O-Methyltricetin-7-O-glucoside          | C <sub>9</sub> H <sub>11</sub> NO <sub>3</sub>                | [M+H] <sup>+</sup> | Flavonoids | 16031   | 52339   | 62388   | 30720   | 36242   |

|     |                                             |                                                               |                    |            |         |         |         |         |         |
|-----|---------------------------------------------|---------------------------------------------------------------|--------------------|------------|---------|---------|---------|---------|---------|
|     | ide                                         |                                                               |                    |            |         |         |         |         |         |
| 590 | Eupatilin-7-O-glucoside                     | C <sub>11</sub> H <sub>14</sub> N <sub>2</sub> O <sub>3</sub> | [M+H] <sup>+</sup> | Flavonoids | 16846   | 17396   | 18252   | 20620   | 13320   |
| 591 | Orientin-6-C-arabinoside                    | C <sub>9</sub> H <sub>11</sub> NO <sub>3</sub>                | [M+H] <sup>+</sup> | Flavonoids | 55020   | 12476   | 20815   | 29678   | 41407   |
| 592 | Luteolin-7-O-(6"-malonyl)glucoside*         | C <sub>11</sub> H <sub>14</sub> N <sub>2</sub> O <sub>3</sub> | [M+H] <sup>+</sup> | Flavonoids | 24308   | 15223   | 8233    | 15634   | 30616   |
| 593 | Isorhamnetin-3-O-neohesperidoside*          | C <sub>9</sub> H <sub>11</sub> NO <sub>3</sub>                | [M+H] <sup>+</sup> | Flavonoids | 1948977 | 1066405 | 739482  | 1273567 | 1441009 |
| 594 | Quercetin-3-O-neohesperidoside*             | C <sub>11</sub> H <sub>14</sub> N <sub>2</sub> O <sub>3</sub> | [M+H] <sup>+</sup> | Flavonoids | 1196087 | 770167  | 812964  | 1042536 | 1024003 |
| 595 | Isorhamnetin-3-O-sophoroside                | C <sub>9</sub> H <sub>11</sub> NO <sub>3</sub>                | [M+H] <sup>+</sup> | Flavonoids | 20595   | 67714   | 68977   | 61275   | 65853   |
| 596 | Quercetin-3-O-sophoroside-7-O-rhamnoside    | C <sub>11</sub> H <sub>14</sub> N <sub>2</sub> O <sub>3</sub> | [M+H] <sup>+</sup> | Flavonoids | 124918  | 124315  | 113205  | 149530  | 154242  |
| 597 | Kaempferol-3-O-glucoside-7-O-rhamnoside*    | C <sub>9</sub> H <sub>11</sub> NO <sub>3</sub>                | [M+H] <sup>+</sup> | Flavonoids | 3488998 | 1989139 | 1643796 | 2453512 | 2797512 |
| 598 | Quercetin-3-O-glucoside-7-O-rhamnoside*     | C <sub>11</sub> H <sub>14</sub> N <sub>2</sub> O <sub>3</sub> | [M+H] <sup>+</sup> | Flavonoids | 1177681 | 693923  | 791493  | 1009686 | 980401  |
| 599 | Quercetin-3-O-sambubioside                  | C <sub>9</sub> H <sub>11</sub> NO <sub>3</sub>                | [M+H] <sup>+</sup> | Flavonoids | 35562   | 41680   | 28604   | 36297   | 33749   |
| 600 | Isorhamnetin-3-O-rutinoside-4'-O-glucoside* | C <sub>11</sub> H <sub>14</sub> N <sub>2</sub> O <sub>3</sub> | [M+H] <sup>+</sup> | Flavonoids | 13210   | 33012   | 26697   | 38532   | 29436   |
| 601 | Kaempferol-3-O-(2"-O-acetyl)glucuronide     | C <sub>9</sub> H <sub>11</sub> NO <sub>3</sub>                | [M-H]-             | Flavonoids | 49563   | 114387  | 74551   | 110195  | 80832   |
| 602 | Quercetin-7-O-(6"-malonyl)glucoside         | C <sub>11</sub> H <sub>14</sub> N <sub>2</sub> O <sub>3</sub> | [M+H] <sup>+</sup> | Flavonoids | 123730  | 65221   | 65352   | 96273   | 103383  |
| 603 | Kaempferol-6,8-di-C-glucoside*              | C <sub>9</sub> H <sub>11</sub> NO <sub>3</sub>                | [M+H] <sup>+</sup> | Flavonoids | 154506  | 159020  | 138035  | 131446  | 120826  |
| 604 | Quercetin-3-O-xyloside (Reynoutrin)*        | C <sub>11</sub> H <sub>14</sub> N <sub>2</sub> O <sub>3</sub> | [M+H] <sup>+</sup> | Flavonoids | 353030  | 187925  | 269343  | 277913  | 293049  |
| 605 | Kaempferol-3-O-neohesperidoside             | C <sub>9</sub> H <sub>11</sub> NO <sub>3</sub>                | [M+H] <sup>+</sup> | Flavonoids | 3789776 | 1869923 | 1647296 | 2593936 | 2704893 |

|     |                                                                    |                                                               |                    |            |         |         |         |         |         |
|-----|--------------------------------------------------------------------|---------------------------------------------------------------|--------------------|------------|---------|---------|---------|---------|---------|
|     | side*                                                              |                                                               |                    |            |         |         |         |         |         |
| 606 | Isorhamnetin-3-O-Glucoside*                                        | C <sub>11</sub> H <sub>14</sub> N <sub>2</sub> O <sub>3</sub> | [M+H] <sup>+</sup> | Flavonoids | 225804  | 191924  | 239533  | 278482  | 259069  |
| 607 | Quercetin-3-O-rutinoside<br>(Rutin)*                               | C <sub>9</sub> H <sub>11</sub> NO <sub>3</sub>                | [M+H] <sup>+</sup> | Flavonoids | 1172569 | 679240  | 808257  | 995554  | 989299  |
| 608 | Quercetin-7-O-rutinoside*                                          | C <sub>11</sub> H <sub>14</sub> N <sub>2</sub> O <sub>3</sub> | [M+H] <sup>+</sup> | Flavonoids | 1301184 | 725903  | 851572  | 1075808 | 1003833 |
| 609 | Quercetin-3-O-glucoside<br>(Isoquercitrin)*                        | C <sub>9</sub> H <sub>11</sub> NO <sub>3</sub>                | [M+H] <sup>+</sup> | Flavonoids | 3629768 | 1994033 | 3132896 | 3775017 | 2992534 |
| 610 | Isorhamnetin-7-O-glucoside<br>(Brassicin)*                         | C <sub>11</sub> H <sub>14</sub> N <sub>2</sub> O <sub>3</sub> | [M+H] <sup>+</sup> | Flavonoids | 249257  | 192790  | 229726  | 302107  | 261046  |
| 611 | Isorhamnetin-3-O-rutinoside<br>(Narcissin)*                        | C <sub>9</sub> H <sub>11</sub> NO <sub>3</sub>                | [M+H] <sup>+</sup> | Flavonoids | 1987851 | 1119427 | 815013  | 1212017 | 1507362 |
| 612 | Kaempferol-3-O-rutinoside(Ni<br>cotiflorin)*                       | C <sub>11</sub> H <sub>14</sub> N <sub>2</sub> O <sub>3</sub> | [M+H] <sup>+</sup> | Flavonoids | 3292872 | 1668696 | 1511575 | 2336365 | 2879817 |
| 613 | Quercetin-3-O-(6"-O-p-coumar<br>oyl)sophoroside-7-O-rhamnosi<br>de | C <sub>9</sub> H <sub>11</sub> NO <sub>3</sub>                | [M+H] <sup>+</sup> | Flavonoids | 35462   | 132044  | 115435  | 75448   | 98119   |
| 614 | Isorhamnetin;<br>3'-Methoxy-3,4',5,7-Tetrahydr<br>oxyflavone       | C <sub>11</sub> H <sub>14</sub> N <sub>2</sub> O <sub>3</sub> | [M-H]-             | Flavonoids | 20524   | 15838   | 59594   | 39094   | 22104   |
| 615 | Kaempferol-3-O-glucoside<br>(Astragalin)*                          | C <sub>9</sub> H <sub>11</sub> NO <sub>3</sub>                | [M+H] <sup>+</sup> | Flavonoids | 118852  | 73203   | 112614  | 139736  | 87665   |
| 616 | Isorhamnetin-3-O-(6"-acetylgl<br>ucoside)                          | C <sub>11</sub> H <sub>14</sub> N <sub>2</sub> O <sub>3</sub> | [M-H]-             | Flavonoids | 18602   | 11852   | 6567    | 9148    | 14045   |
| 617 | Quercetin                                                          | C <sub>9</sub> H <sub>11</sub> NO <sub>3</sub>                | [M+H] <sup>+</sup> | Flavonoids | 18299   | 7264    | 94467   | 46917   | 23283   |
| 618 | Quercetin-4'-O-glucoside<br>(Spiraeoside)*                         | C <sub>11</sub> H <sub>14</sub> N <sub>2</sub> O <sub>3</sub> | [M-H]-             | Flavonoids | 1780852 | 1207352 | 1926483 | 2455895 | 1943571 |
| 619 | Quercetin-5-O-β-D-glucoside*                                       | C <sub>9</sub> H <sub>11</sub> NO <sub>3</sub>                | [M+H] <sup>+</sup> | Flavonoids | 3368466 | 2081534 | 3094579 | 4023575 | 3116614 |
| 620 | Kaempferol-3-O-glucorhamno                                         | C <sub>11</sub> H <sub>14</sub> N <sub>2</sub> O <sub>3</sub> | [M+H] <sup>+</sup> | Flavonoids | 3500625 | 1946599 | 1506333 | 2518992 | 2574354 |

|     |                                                      |                                                               |                    |            |         |         |         |         |         |
|-----|------------------------------------------------------|---------------------------------------------------------------|--------------------|------------|---------|---------|---------|---------|---------|
|     | side*                                                |                                                               |                    |            |         |         |         |         |         |
| 621 | Quercetin-3-O-rutinoside-7-O-glucoside               | C <sub>9</sub> H <sub>11</sub> NO <sub>3</sub>                | [M+H] <sup>+</sup> | Flavonoids | 113230  | 107438  | 109810  | 135007  | 132776  |
| 622 | Quercetin-3-O-(4"-O-glucosyl) rhamnoside*            | C <sub>11</sub> H <sub>14</sub> N <sub>2</sub> O <sub>3</sub> | [M+H] <sup>+</sup> | Flavonoids | 1300928 | 791283  | 874306  | 1198855 | 1093412 |
| 623 | Avicularin(Quercetin-3-O-α-L-arabinofuranoside)      | C <sub>9</sub> H <sub>11</sub> NO <sub>3</sub>                | [M+H] <sup>+</sup> | Flavonoids | 342027  | 246225  | 267967  | 307105  | 280060  |
| 624 | Quercetin-3-O-arabinoside*                           | C <sub>11</sub> H <sub>14</sub> N <sub>2</sub> O <sub>3</sub> | [M-H]-             | Flavonoids | 204668  | 144019  | 212056  | 229632  | 267360  |
| 625 | 3,5,6,7,8,3',4'-Heptamethoxyflavone                  | C <sub>9</sub> H <sub>11</sub> NO <sub>3</sub>                | [M+H] <sup>+</sup> | Flavonoids | 91783   | 21548   | 10609   | 26111   | 57840   |
| 626 | Kaempferol-4'-O-glucoside*                           | C <sub>11</sub> H <sub>14</sub> N <sub>2</sub> O <sub>3</sub> | [M+H] <sup>+</sup> | Flavonoids | 113360  | 79153   | 87876   | 155494  | 101724  |
| 627 | Kaempferol-7-O-glucoside*                            | C <sub>9</sub> H <sub>11</sub> NO <sub>3</sub>                | [M-H]-             | Flavonoids | 28207   | 29489   | 29546   | 41752   | 32036   |
| 628 | Kaempferol-3-O-sophoroside                           | C <sub>11</sub> H <sub>14</sub> N <sub>2</sub> O <sub>3</sub> | [M-H]-             | Flavonoids | 10810   | 7176    | 15844   | 16853   | 10213   |
| 629 | Quercetin-3-O-galactoside (Hyperin)*                 | C <sub>9</sub> H <sub>11</sub> NO <sub>3</sub>                | [M+H] <sup>+</sup> | Flavonoids | 3676112 | 2118795 | 3215191 | 4042526 | 2907756 |
| 630 | Quercetin-3-O-(2"-O-rhamnosyl)galactoside            | C <sub>11</sub> H <sub>14</sub> N <sub>2</sub> O <sub>3</sub> | [M+H] <sup>+</sup> | Flavonoids | 47261   | 149346  | 97426   | 64865   | 85247   |
| 631 | Limocitrin-3-O-galactoside                           | C <sub>9</sub> H <sub>11</sub> NO <sub>3</sub>                | [M+H] <sup>+</sup> | Flavonoids | 58524   | 21318   | 27461   | 31431   | 45225   |
| 632 | Kaempferol-3-O-sophoroside-7-O-rhamnoside*           | C <sub>11</sub> H <sub>14</sub> N <sub>2</sub> O <sub>3</sub> | [M+H] <sup>+</sup> | Flavonoids | 5603    | 10053   | 9219    | 11921   | 12085   |
| 633 | Quercetin-7-O-(2"-malonyl)glucosyl-5-O-glucoside     | C <sub>9</sub> H <sub>11</sub> NO <sub>3</sub>                | [M+H] <sup>+</sup> | Flavonoids | 48182   | 31640   | 13820   | 24336   | 12313   |
| 634 | Quercetin-3-O-glucosyl(1→4)rhamnoside-7-O-rutinoside | C <sub>11</sub> H <sub>14</sub> N <sub>2</sub> O <sub>3</sub> | [M+H] <sup>+</sup> | Flavonoids | 49258   | 153453  | 113187  | 79341   | 105970  |
| 635 | Quercetagenin-4'-Methyl Ether                        | C <sub>9</sub> H <sub>11</sub> NO <sub>3</sub>                | [M-H]-             | Flavonoids | 5312    | 16065   | 7769    | 13530   | 8133    |
| 636 | Isorhamnetin-3,7-O-diglucoside                       | C <sub>11</sub> H <sub>14</sub> N <sub>2</sub> O <sub>3</sub> | [M+H] <sup>+</sup> | Flavonoids | 13044   | 35702   | 33880   | 33968   | 28606   |
| 637 | Kaempferol                                           | C <sub>9</sub> H <sub>11</sub> NO <sub>3</sub>                | [M-H]-             | Flavonoids | 5965    | 9       | 17366   | 12634   | 9804    |

|     |                                                                                      |                                                               |                    |            |        |        |        |        |        |
|-----|--------------------------------------------------------------------------------------|---------------------------------------------------------------|--------------------|------------|--------|--------|--------|--------|--------|
| 638 | (3,5,7,4'-Tetrahydroxyflavone)<br>3,5,4'-Trihydroxy-7-methoxyflavone (Rhamnocitrin)* | C <sub>11</sub> H <sub>14</sub> N <sub>2</sub> O <sub>3</sub> | [M+H] <sup>+</sup> | Flavonoids | 42977  | 69929  | 55298  | 45341  | 62768  |
| 639 | Quercetin-3-O-rhamnoside(Quercitrin)                                                 | C <sub>9</sub> H <sub>11</sub> NO <sub>3</sub>                | [M+H] <sup>+</sup> | Flavonoids | 46727  | 26392  | 33130  | 39493  | 50446  |
| 640 | Quercetin-3-O-sophoroside (Baimaside)                                                | C <sub>11</sub> H <sub>14</sub> N <sub>2</sub> O <sub>3</sub> | [M+H] <sup>+</sup> | Flavonoids | 109377 | 119209 | 120943 | 119340 | 77089  |
| 641 | Kaempferol-3-O-neohesperidoside-7-O-glucoside*                                       | C <sub>9</sub> H <sub>11</sub> NO <sub>3</sub>                | [M+H] <sup>+</sup> | Flavonoids | 5398   | 14738  | 7376   | 13012  | 11364  |
| 642 | Kaempferol-3-O-(6"-malonyl)glucoside*                                                | C <sub>11</sub> H <sub>14</sub> N <sub>2</sub> O <sub>3</sub> | [M+H] <sup>+</sup> | Flavonoids | 19970  | 14887  | 10487  | 8108   | 27929  |
| 643 | Quercetin-3,7-Di-O-glucoside                                                         | C <sub>9</sub> H <sub>11</sub> NO <sub>3</sub>                | [M+H] <sup>+</sup> | Flavonoids | 9      | 23110  | 23086  | 29833  | 22584  |
| 644 | Isorhamnetin-3-O-sophoroside-7-O-rhamnoside*                                         | C <sub>11</sub> H <sub>14</sub> N <sub>2</sub> O <sub>3</sub> | [M+H] <sup>+</sup> | Flavonoids | 8009   | 35450  | 30058  | 33814  | 31600  |
| 645 | Quercetin-7-O-glucoside*                                                             | C <sub>9</sub> H <sub>11</sub> NO <sub>3</sub>                | [M-H] <sup>-</sup> | Flavonoids | 123146 | 209149 | 178881 | 186068 | 204704 |
| 646 | Kaempferol-3,7-O-dirhamnoside (Kaempferitrin)                                        | C <sub>11</sub> H <sub>14</sub> N <sub>2</sub> O <sub>3</sub> | [M+H] <sup>+</sup> | Flavonoids | 29995  | 39322  | 29410  | 20451  | 32469  |
| 647 | Quercetin-3-O-(6"-O-acetyl)galactoside                                               | C <sub>9</sub> H <sub>11</sub> NO <sub>3</sub>                | [M-H] <sup>-</sup> | Flavonoids | 42980  | 19631  | 22574  | 35205  | 54396  |
| 648 | Quercetin-3,3'-dimethyl ether                                                        | C <sub>11</sub> H <sub>14</sub> N <sub>2</sub> O <sub>3</sub> | [M-H] <sup>-</sup> | Flavonoids | 7687   | 5858   | 9      | 3719   | 3100   |
| 649 | Kaempferol-3-O-galactoside (Trifolin)*                                               | C <sub>9</sub> H <sub>11</sub> NO <sub>3</sub>                | [M-H] <sup>-</sup> | Flavonoids | 35361  | 22320  | 40424  | 37552  | 25363  |
| 650 | Quercetin-3-O-(2'''-O-p-coumaroyl)sophoroside-7-O-glucoside                          | C <sub>11</sub> H <sub>14</sub> N <sub>2</sub> O <sub>3</sub> | [M+H] <sup>+</sup> | Flavonoids | 76182  | 31075  | 48528  | 57354  | 57444  |
| 651 | Isorhamnetin-3-O-(6"-malonyl)glucoside                                               | C <sub>9</sub> H <sub>11</sub> NO <sub>3</sub>                | [M+H] <sup>+</sup> | Flavonoids | 65534  | 31320  | 18372  | 30022  | 46074  |
| 652 | Quercetin-3-O-rutinoside-7-O-                                                        | C <sub>11</sub> H <sub>14</sub> N <sub>2</sub> O <sub>3</sub> | [M+H] <sup>+</sup> | Flavonoids | 149287 | 71290  | 79306  | 100955 | 108114 |

|     |                                               |                                                               |                    |                       |          |          |          |          |          |
|-----|-----------------------------------------------|---------------------------------------------------------------|--------------------|-----------------------|----------|----------|----------|----------|----------|
|     | rhamnoside                                    |                                                               |                    |                       |          |          |          |          |          |
| 653 | Kaempferol-3-O-glucuronide                    | C <sub>9</sub> H <sub>11</sub> NO <sub>3</sub>                | [M-H]-             | Flavonoids            | 8471     | 9884     | 12237    | 12845    | 17257    |
| 654 | Epicatechin gallate*                          | C <sub>11</sub> H <sub>14</sub> N <sub>2</sub> O <sub>3</sub> | [M-H]-             | Flavonoids            | 6465     | 7886     | 14126    | 14674    | 31233    |
| 655 | Catechin gallate*                             | C <sub>9</sub> H <sub>11</sub> NO <sub>3</sub>                | [M-H]-             | Flavonoids            | 35694    | 39496    | 42535    | 46270    | 41326    |
| 656 | 5-Hydroxyquinoline                            | C <sub>11</sub> H <sub>14</sub> N <sub>2</sub> O <sub>3</sub> | [M+H] <sup>+</sup> | Alkaloids             | 37634    | 34939    | 38519    | 24471    | 23702    |
| 657 | 2,4-Dihydroxyquinoline                        | C <sub>9</sub> H <sub>11</sub> NO <sub>3</sub>                | [M+H] <sup>+</sup> | Alkaloids             | 9        | 27436    | 19179    | 19552    | 19989    |
| 658 | 4-Hydroxyquinoline                            | C <sub>11</sub> H <sub>14</sub> N <sub>2</sub> O <sub>3</sub> | [M-H]-             | Alkaloids             | 15668    | 24027    | 22285    | 39209    | 32121    |
| 659 | 2,6-Dimethoxy-1,4-benzoquinone*               | C <sub>9</sub> H <sub>11</sub> NO <sub>3</sub>                | [M+H] <sup>+</sup> | Quinones              | 1473983  | 1695074  | 1453206  | 1313651  | 1041412  |
| 660 | 2,5-Dimethoxybenzoquinone*                    | C <sub>11</sub> H <sub>14</sub> N <sub>2</sub> O <sub>3</sub> | [M+H] <sup>+</sup> | Quinones              | 137510   | 135029   | 123470   | 128876   | 92413    |
| 661 | Choline Alfoscerate                           | C <sub>9</sub> H <sub>11</sub> NO <sub>3</sub>                | [M+H] <sup>+</sup> | Lipids                | 119275   | 8055555  | 8375327  | 8534672  | 1441260  |
| 662 | Medioresinol-4,4'-di-O-glucoside              | C <sub>11</sub> H <sub>14</sub> N <sub>2</sub> O <sub>3</sub> | [M-H]-             | Lignans and Coumarins | 214516   | 1177731  | 1195294  | 982442   | 680596   |
| 663 | Syringaresinol-4'-O-(6"-acetyl) glucoside     | C <sub>9</sub> H <sub>11</sub> NO <sub>3</sub>                | [M-H]-             | Lignans and Coumarins | 4793327  | 6237978  | 7405098  | 5070065  | 3358198  |
| 664 | 4-Ketopinoresinol                             | C <sub>11</sub> H <sub>14</sub> N <sub>2</sub> O <sub>3</sub> | [M-H]-             | Lignans and Coumarins | 10340    | 35360    | 41866    | 45718    | 68094    |
| 665 | Matairesinol-4'-O-glucoside (Matairesinoside) | C <sub>9</sub> H <sub>11</sub> NO <sub>3</sub>                | [M+H] <sup>+</sup> | Lignans and Coumarins | 1684533  | 1945057  | 2093226  | 1384214  | 1436743  |
| 666 | Syringaresinol-4'-O-glucoside                 | C <sub>11</sub> H <sub>14</sub> N <sub>2</sub> O <sub>3</sub> | [M-H]-             | Lignans and Coumarins | 17115845 | 21682539 | 28178138 | 23456683 | 24411083 |
| 667 | 5'-Methoxyisolariciresinol-9'-O-glucoside     | C <sub>9</sub> H <sub>11</sub> NO <sub>3</sub>                | [M-H]-             | Lignans and Coumarins | 1302106  | 953002   | 1771736  | 1353884  | 1299682  |
| 668 | Dehydrodiconiferyl alcohol                    | C <sub>11</sub> H <sub>14</sub> N <sub>2</sub> O <sub>3</sub> | [M+H] <sup>+</sup> | Lignans and Coumarins | 118972   | 71317    | 78142    | 88423    | 51339    |
| 669 | Matairesinol                                  | C <sub>9</sub> H <sub>11</sub> NO <sub>3</sub>                | [M+H] <sup>+</sup> | Lignans and Coumarins | 294892   | 155035   | 174856   | 160010   | 127019   |
| 670 | Dihydrodehydrodiconiferyl                     | C <sub>11</sub> H <sub>14</sub> N <sub>2</sub> O <sub>3</sub> | [M-H]-             | Lignans and           | 728573   | 511788   | 795157   | 603369   | 536266   |

|     |                                        |                                                               |        |                          |         |         |         |         |         |
|-----|----------------------------------------|---------------------------------------------------------------|--------|--------------------------|---------|---------|---------|---------|---------|
|     | alcohol-4-O-glucoside*                 |                                                               |        | Coumarins                |         |         |         |         |         |
| 671 | Epipinoresinol*                        | C <sub>9</sub> H <sub>11</sub> NO <sub>3</sub>                | [M-H]- | Lignans and<br>Coumarins | 74499   | 104916  | 98039   | 95837   | 109188  |
| 672 | Secoisolariciresinol<br>4-O-glucoside  | C <sub>11</sub> H <sub>14</sub> N <sub>2</sub> O <sub>3</sub> | [M-H]- | Lignans and<br>Coumarins | 2489083 | 1976636 | 3207159 | 2312371 | 2727315 |
| 673 | Pinoresinol*                           | C <sub>9</sub> H <sub>11</sub> NO <sub>3</sub>                | [M-H]- | Lignans and<br>Coumarins | 73333   | 105363  | 110269  | 97472   | 103462  |
| 674 | Pinoresinol-4-O-glucoside              | C <sub>11</sub> H <sub>14</sub> N <sub>2</sub> O <sub>3</sub> | [M-H]- | Lignans and<br>Coumarins | 97889   | 171622  | 160780  | 128074  | 168490  |
| 675 | 5'-Methoxymatairesinoside              | C <sub>9</sub> H <sub>11</sub> NO <sub>3</sub>                | [M-H]- | Lignans and<br>Coumarins | 273688  | 353116  | 289487  | 411836  | 311243  |
| 676 | Olivil-4'-O-glucoside                  | C <sub>11</sub> H <sub>14</sub> N <sub>2</sub> O <sub>3</sub> | [M-H]- | Lignans and<br>Coumarins | 257522  | 283274  | 315618  | 245981  | 177155  |
| 677 | Isolariciresinol-9'-O-glucoside<br>*   | C <sub>9</sub> H <sub>11</sub> NO <sub>3</sub>                | [M-H]- | Lignans and<br>Coumarins | 780690  | 551756  | 783724  | 726597  | 721633  |
| 678 | Olivil-4,4'-Di-O-glucoside             | C <sub>11</sub> H <sub>14</sub> N <sub>2</sub> O <sub>3</sub> | [M-H]- | Lignans and<br>Coumarins | 129352  | 197484  | 231027  | 128508  | 118806  |
| 679 | 1-Hydroxypinoresinol-1-O-Glu<br>coside | C <sub>9</sub> H <sub>11</sub> NO <sub>3</sub>                | [M-H]- | Lignans and<br>Coumarins | 156455  | 86840   | 90417   | 92664   | 99573   |
| 680 | Isolariciresinol                       | C <sub>11</sub> H <sub>14</sub> N <sub>2</sub> O <sub>3</sub> | [M-H]- | Lignans and<br>Coumarins | 9365    | 6254    | 8402    | 6365    | 3821    |
| 681 | Syringaresinol                         | C <sub>9</sub> H <sub>11</sub> NO <sub>3</sub>                | [M-H]- | Lignans and<br>Coumarins | 1032664 | 1125280 | 1321384 | 964089  | 931136  |
| 682 | Lirioresinol A                         | C <sub>11</sub> H <sub>14</sub> N <sub>2</sub> O <sub>3</sub> | [M-H]- | Lignans and<br>Coumarins | 4335607 | 4607035 | 5688604 | 4090150 | 4061853 |
| 683 | 3,4-Methylenedioxy cinnamyl<br>alcohol | C <sub>9</sub> H <sub>11</sub> NO <sub>3</sub>                | [M-H]- | Lignans and<br>Coumarins | 91864   | 106012  | 89184   | 105618  | 57026   |
| 684 | Pinoresinol-4,4'-O-di-O-glucos         | C <sub>11</sub> H <sub>14</sub> N <sub>2</sub> O <sub>3</sub> | [M-H]- | Lignans and              | 242841  | 769729  | 829657  | 694473  | 653283  |

|     |                                                                        |                                                               |                    |                          |         |         |         |         |         |
|-----|------------------------------------------------------------------------|---------------------------------------------------------------|--------------------|--------------------------|---------|---------|---------|---------|---------|
|     | ide                                                                    |                                                               |                    | Coumarins                |         |         |         |         |         |
| 685 | Medioresinol-4'-O-(6'''-acetyl)<br>glucoside                           | C <sub>9</sub> H <sub>11</sub> NO <sub>3</sub>                | [M-H]-             | Lignans and<br>Coumarins | 82050   | 112669  | 103442  | 76093   | 59570   |
| 686 | Lyoniresinol                                                           | C <sub>11</sub> H <sub>14</sub> N <sub>2</sub> O <sub>3</sub> | [M-H]-             | Lignans and<br>Coumarins | 23799   | 26907   | 44940   | 50237   | 50383   |
| 687 | Pinoresinol-4,4'-O-β-D-bisgluc<br>opyranoside                          | C <sub>9</sub> H <sub>11</sub> NO <sub>3</sub>                | [M+H] <sup>+</sup> | Lignans and<br>Coumarins | 14112   | 17417   | 14498   | 19777   | 8886    |
| 688 | 8-Hydroxy-α-conidendrin                                                | C <sub>11</sub> H <sub>14</sub> N <sub>2</sub> O <sub>3</sub> | [M-H]-             | Lignans and<br>Coumarins | 9608    | 13959   | 8433    | 17212   | 15809   |
| 689 | Senkyunolide K                                                         | C <sub>9</sub> H <sub>11</sub> NO <sub>3</sub>                | [M+H] <sup>+</sup> | Others                   | 310306  | 3058    | 5506    | 5440    | 9       |
| 690 | Senkyunolide M                                                         | C <sub>11</sub> H <sub>14</sub> N <sub>2</sub> O <sub>3</sub> | [M+H] <sup>+</sup> | Others                   | 3221204 | 3596126 | 3543731 | 3396420 | 3740775 |
| 691 | Senkyunolide B                                                         | C <sub>9</sub> H <sub>11</sub> NO <sub>3</sub>                | [M+H] <sup>+</sup> | Others                   | 1113091 | 1341197 | 1512942 | 1365916 | 1490039 |
| 692 | Hydroxydihydrobovolide                                                 | C <sub>11</sub> H <sub>14</sub> N <sub>2</sub> O <sub>3</sub> | [M-H]-             | Others                   | 158435  | 1039949 | 1298170 | 1254630 | 1233255 |
| 693 | 2-Piperidone                                                           | C <sub>9</sub> H <sub>11</sub> NO <sub>3</sub>                | [M+H] <sup>+</sup> | Alkaloids                | 250507  | 201390  | 296743  | 502758  | 114226  |
| 694 | Piperidine                                                             | C <sub>11</sub> H <sub>14</sub> N <sub>2</sub> O <sub>3</sub> | [M+H] <sup>+</sup> | Alkaloids                | 6060462 | 3760998 | 4092326 | 5793546 | 2600560 |
| 695 | N-Hydroxypipericolic acid                                              | C <sub>9</sub> H <sub>11</sub> NO <sub>3</sub>                | [M+H] <sup>+</sup> | Alkaloids                | 106997  | 207715  | 107630  | 130967  | 138696  |
| 696 | 6-Deoxyfagomine                                                        | C <sub>11</sub> H <sub>14</sub> N <sub>2</sub> O <sub>3</sub> | [M+H] <sup>+</sup> | Alkaloids                | 8030751 | 5354835 | 5472800 | 7637945 | 3655819 |
| 697 | 2-Ethyl-2,6,6-trimethylpiperidi<br>n-4-one                             | C <sub>9</sub> H <sub>11</sub> NO <sub>3</sub>                | [M+H] <sup>+</sup> | Alkaloids                | 135835  | 42844   | 38649   | 41003   | 71976   |
| 698 | 2,6-Dimethoxypydroquinone-1<br>-O-glucoside                            | C <sub>11</sub> H <sub>14</sub> N <sub>2</sub> O <sub>3</sub> | [M+H] <sup>+</sup> | Flavonoids               | 17658   | 239617  | 1030643 | 163354  | 619964  |
| 699 | 7-Methoxy-3-[1-(3-pyridyl)me<br>thylidene]-4-chromanone                | C <sub>9</sub> H <sub>11</sub> NO <sub>3</sub>                | [M+H] <sup>+</sup> | Flavonoids               | 2542872 | 6130873 | 5613399 | 6847851 | 5802467 |
| 700 | 1,3,6,8-Tetrahydroxy-2-metho<br>xyxanthone                             | C <sub>11</sub> H <sub>14</sub> N <sub>2</sub> O <sub>3</sub> | [M-H]-             | Flavonoids               | 15056   | 30928   | 24210   | 21182   | 20949   |
| 701 | 5-hydroxy-3-(2-hydroxy-4-met<br>hoxybenzyl)-7-methoxychrom<br>an-4-one | C <sub>9</sub> H <sub>11</sub> NO <sub>3</sub>                | [M+H] <sup>+</sup> | Flavonoids               | 412284  | 1212725 | 890721  | 503604  | 722487  |



|     |                                           |                                                               |                    |            |         |          |          |          |          |
|-----|-------------------------------------------|---------------------------------------------------------------|--------------------|------------|---------|----------|----------|----------|----------|
| 702 | 6,7-dihydroxy-1,3-dimethoxyxanthen-9-one  | C <sub>11</sub> H <sub>14</sub> N <sub>2</sub> O <sub>3</sub> | [M-H] <sup>-</sup> | Flavonoids | 275497  | 641196   | 579454   | 524100   | 469472   |
| 703 | 5-hydroxy-2-methoxyxanthen-9-one          | C <sub>9</sub> H <sub>11</sub> NO <sub>3</sub>                | [M-H] <sup>-</sup> | Flavonoids | 26618   | 40205    | 38123    | 37035    | 33687    |
| 704 | 1,8-dihydroxy-2,6-dimethylxanthen-9-one   | C <sub>11</sub> H <sub>14</sub> N <sub>2</sub> O <sub>3</sub> | [M-H] <sup>-</sup> | Flavonoids | 9       | 120380   | 138794   | 115834   | 154880   |
| 705 | 1-Glycosyloxy-2-hydroxy-4-methoxyxanthone | C <sub>9</sub> H <sub>11</sub> NO <sub>3</sub>                | [M+H] <sup>+</sup> | Flavonoids | 11650   | 10022    | 27666    | 13957    | 12114    |
| 706 | Hexadecylsphingosine                      | C <sub>11</sub> H <sub>14</sub> N <sub>2</sub> O <sub>3</sub> | [M+H] <sup>+</sup> | Lipids     | 2053506 | 2073292  | 1899120  | 1937796  | 2336614  |
| 707 | 3-Dehydrosphinganine                      | C <sub>9</sub> H <sub>11</sub> NO <sub>3</sub>                | [M+H] <sup>+</sup> | Lipids     | 12571   | 10504    | 9201     | 12409    | 7028     |
| 708 | 4-Hydroxysphinganine                      | C <sub>11</sub> H <sub>14</sub> N <sub>2</sub> O <sub>3</sub> | [M+H] <sup>+</sup> | Lipids     | 6278187 | 6131991  | 6393737  | 6765104  | 4394210  |
| 709 | D-Sphingosine                             | C <sub>9</sub> H <sub>11</sub> NO <sub>3</sub>                | [M+H] <sup>+</sup> | Lipids     | 29147   | 18268    | 18818    | 20271    | 11490    |
| 710 | 4-Guanidinobutanal                        | C <sub>11</sub> H <sub>14</sub> N <sub>2</sub> O <sub>3</sub> | [M+H] <sup>+</sup> | Others     | 2509691 | 2775866  | 4684272  | 6224465  | 4317461  |
| 711 | 5-Hydroxymethylfurfural                   | C <sub>9</sub> H <sub>11</sub> NO <sub>3</sub>                | [M+H] <sup>+</sup> | Others     | 9       | 609702   | 458509   | 480744   | 8578004  |
| 712 | 4-hydroxyphenylacrylaldehyde              | C <sub>11</sub> H <sub>14</sub> N <sub>2</sub> O <sub>3</sub> | [M+H] <sup>+</sup> | Others     | 112895  | 208673   | 213154   | 176179   | 225508   |
| 713 | 4-Methylbenzaldehyde*                     | C <sub>9</sub> H <sub>11</sub> NO <sub>3</sub>                | [M-H] <sup>-</sup> | Others     | 89577   | 205824   | 258904   | 208189   | 315597   |
| 714 | 3-Methylbenzaldehyde*                     | C <sub>11</sub> H <sub>14</sub> N <sub>2</sub> O <sub>3</sub> | [M-H] <sup>-</sup> | Others     | 89577   | 205824   | 258904   | 208189   | 315597   |
| 715 | 2,4-Dihydroxybenzaldehyde                 | C <sub>9</sub> H <sub>11</sub> NO <sub>3</sub>                | [M-H] <sup>-</sup> | Others     | 16781   | 10932    | 17848    | 23865    | 17001    |
| 716 | LysoPC 18:1(2n isomer)                    | C <sub>11</sub> H <sub>14</sub> N <sub>2</sub> O <sub>3</sub> | [M+H] <sup>+</sup> | Lipids     | 371210  | 16255864 | 62769267 | 65140689 | 11650939 |
| 717 | LysoPC 15:0                               | C <sub>9</sub> H <sub>11</sub> NO <sub>3</sub>                | [M+H] <sup>+</sup> | Lipids     | 28508   | 5408207  | 16074329 | 16985838 | 4557463  |
| 718 | LysoPC 18:2                               | C <sub>11</sub> H <sub>14</sub> N <sub>2</sub> O <sub>3</sub> | [M+H] <sup>+</sup> | Lipids     | 7393    | 1010062  | 3094351  | 2973050  | 725434   |
| 719 | LysoPC 19:0                               | C <sub>9</sub> H <sub>11</sub> NO <sub>3</sub>                | [M+H] <sup>+</sup> | Lipids     | 9       | 71417    | 382468   | 935756   | 9        |
| 720 | LysoPC 20:2                               | C <sub>11</sub> H <sub>14</sub> N <sub>2</sub> O <sub>3</sub> | [M+H] <sup>+</sup> | Lipids     | 3636    | 940110   | 505372   | 637449   | 722750   |
| 721 | LysoPC 16:1                               | C <sub>9</sub> H <sub>11</sub> NO <sub>3</sub>                | [M+H] <sup>+</sup> | Lipids     | 13692   | 191007   | 455649   | 472686   | 259592   |
| 722 | LysoPC 18:3                               | C <sub>11</sub> H <sub>14</sub> N <sub>2</sub> O <sub>3</sub> | [M+H] <sup>+</sup> | Lipids     | 129688  | 13057240 | 38569072 | 32967621 | 17430833 |
| 723 | LysoPC 17:2                               | C <sub>9</sub> H <sub>11</sub> NO <sub>3</sub>                | [M+H] <sup>+</sup> | Lipids     | 5553    | 339572   | 1674651  | 1688105  | 269147   |
| 724 | LysoPC 16:1(2n isomer)                    | C <sub>11</sub> H <sub>14</sub> N <sub>2</sub> O <sub>3</sub> | [M+H] <sup>+</sup> | Lipids     | 20329   | 805419   | 3744970  | 4494340  | 560538   |

|     |                        |                                                               |                    |        |        |          |          |          |          |
|-----|------------------------|---------------------------------------------------------------|--------------------|--------|--------|----------|----------|----------|----------|
| 725 | LysoPC 16:0            | C <sub>9</sub> H <sub>11</sub> NO <sub>3</sub>                | [M+H] <sup>+</sup> | Lipids | 352663 | 56331655 | 28902349 | 39846809 | 39763410 |
| 726 | LysoPC 17:0(2n isomer) | C <sub>11</sub> H <sub>14</sub> N <sub>2</sub> O <sub>3</sub> | [M+H] <sup>+</sup> | Lipids | 6969   | 748723   | 865304   | 1234033  | 919146   |
| 727 | LysoPC 15:0(2n isomer) | C <sub>9</sub> H <sub>11</sub> NO <sub>3</sub>                | [M+H] <sup>+</sup> | Lipids | 34257  | 7141661  | 20774884 | 21077548 | 5938148  |
| 728 | LysoPC 18:3(2n isomer) | C <sub>11</sub> H <sub>14</sub> N <sub>2</sub> O <sub>3</sub> | [M+H] <sup>+</sup> | Lipids | 4421   | 396841   | 1191036  | 1053271  | 544073   |
| 729 | LysoPC 18:0(2n isomer) | C <sub>9</sub> H <sub>11</sub> NO <sub>3</sub>                | [M+H] <sup>+</sup> | Lipids | 16079  | 1297056  | 1481115  | 2072877  | 1623320  |
| 730 | LysoPC 16:0(2n isomer) | C <sub>11</sub> H <sub>14</sub> N <sub>2</sub> O <sub>3</sub> | [M+H] <sup>+</sup> | Lipids | 76425  | 6459434  | 9284298  | 11552858 | 6702791  |
| 731 | LysoPC 14:0            | C <sub>9</sub> H <sub>11</sub> NO <sub>3</sub>                | [M+H] <sup>+</sup> | Lipids | 10174  | 2287437  | 6601680  | 6897830  | 2402939  |
| 732 | LysoPC 20:1            | C <sub>11</sub> H <sub>14</sub> N <sub>2</sub> O <sub>3</sub> | [M+H] <sup>+</sup> | Lipids | 1577   | 230272   | 1084398  | 1140198  | 127386   |
| 733 | LysoPC 12:0            | C <sub>9</sub> H <sub>11</sub> NO <sub>3</sub>                | [M+H] <sup>+</sup> | Lipids | 9      | 112175   | 64405    | 86542    | 88450    |
| 734 | LysoPC 18:0            | C <sub>11</sub> H <sub>14</sub> N <sub>2</sub> O <sub>3</sub> | [M+H] <sup>+</sup> | Lipids | 74835  | 13146382 | 6185108  | 9533805  | 8380151  |
| 735 | LysoPC 16:2            | C <sub>9</sub> H <sub>11</sub> NO <sub>3</sub>                | [M+H] <sup>+</sup> | Lipids | 9      | 31687    | 59493    | 9        | 42013    |
| 736 | LysoPC 17:0            | C <sub>11</sub> H <sub>14</sub> N <sub>2</sub> O <sub>3</sub> | [M+H] <sup>+</sup> | Lipids | 30943  | 6385439  | 2917805  | 5059462  | 4164460  |
| 737 | LysoPC 19:2(2n isomer) | C <sub>9</sub> H <sub>11</sub> NO <sub>3</sub>                | [M+H] <sup>+</sup> | Lipids | 10630  | 232107   | 794343   | 1292537  | 104522   |
| 738 | LysoPC 18:4            | C <sub>11</sub> H <sub>14</sub> N <sub>2</sub> O <sub>3</sub> | [M+H] <sup>+</sup> | Lipids | 9      | 8305     | 74887    | 137195   | 8886     |
| 739 | LysoPC 19:1            | C <sub>9</sub> H <sub>11</sub> NO <sub>3</sub>                | [M+H] <sup>+</sup> | Lipids | 9      | 102440   | 141325   | 142190   | 80969    |
| 740 | LysoPC 20:3            | C <sub>11</sub> H <sub>14</sub> N <sub>2</sub> O <sub>3</sub> | [M+H] <sup>+</sup> | Lipids | 9      | 131805   | 90494    | 113603   | 106617   |
| 741 | LysoPC 16:2(2n isomer) | C <sub>9</sub> H <sub>11</sub> NO <sub>3</sub>                | [M+H] <sup>+</sup> | Lipids | 9      | 30703    | 52830    | 47543    | 42599    |
| 742 | LysoPC 19:2            | C <sub>11</sub> H <sub>14</sub> N <sub>2</sub> O <sub>3</sub> | [M+H] <sup>+</sup> | Lipids | 4397   | 107679   | 295151   | 542171   | 57773    |
| 743 | LysoPC 18:1            | C <sub>9</sub> H <sub>11</sub> NO <sub>3</sub>                | [M+H] <sup>+</sup> | Lipids | 115492 | 6726432  | 13681827 | 12362320 | 5347228  |
| 744 | LysoPC 15:1            | C <sub>11</sub> H <sub>14</sub> N <sub>2</sub> O <sub>3</sub> | [M+H] <sup>+</sup> | Lipids | 9      | 481490   | 297325   | 297915   | 268059   |
| 745 | LysoPC 17:1            | C <sub>9</sub> H <sub>11</sub> NO <sub>3</sub>                | [M+H] <sup>+</sup> | Lipids | 4847   | 195233   | 129717   | 273170   | 161024   |
| 746 | LysoPE 14:0            | C <sub>11</sub> H <sub>14</sub> N <sub>2</sub> O <sub>3</sub> | [M+H] <sup>+</sup> | Lipids | 30395  | 4572335  | 2284072  | 3082417  | 2328347  |
| 747 | LysoPE 20:4            | C <sub>9</sub> H <sub>11</sub> NO <sub>3</sub>                | [M+H] <sup>+</sup> | Lipids | 9      | 8446     | 19820    | 19807    | 4345     |
| 748 | LysoPE 18:1            | C <sub>11</sub> H <sub>14</sub> N <sub>2</sub> O <sub>3</sub> | [M+H] <sup>+</sup> | Lipids | 130884 | 1389658  | 2419361  | 2677298  | 866398   |
| 749 | LysoPE 18:1(2n isomer) | C <sub>9</sub> H <sub>11</sub> NO <sub>3</sub>                | [M+H] <sup>+</sup> | Lipids | 704036 | 2338587  | 14613614 | 17580089 | 741484   |
| 750 | LysoPE 17:0            | C <sub>11</sub> H <sub>14</sub> N <sub>2</sub> O <sub>3</sub> | [M+H] <sup>+</sup> | Lipids | 3065   | 197464   | 186583   | 239206   | 136848   |
| 751 | LysoPE 20:2            | C <sub>9</sub> H <sub>11</sub> NO <sub>3</sub>                | [M+H] <sup>+</sup> | Lipids | 9      | 207661   | 141656   | 154350   | 67783    |
| 752 | LysoPE 16:0            | C <sub>11</sub> H <sub>14</sub> N <sub>2</sub> O <sub>3</sub> | [M+H] <sup>+</sup> | Lipids | 504406 | 19538277 | 10930405 | 15310762 | 8832228  |

|     |                                                                                  |                                                               |                    |            |        |         |          |          |         |
|-----|----------------------------------------------------------------------------------|---------------------------------------------------------------|--------------------|------------|--------|---------|----------|----------|---------|
| 753 | LysoPE 18:2                                                                      | C <sub>9</sub> H <sub>11</sub> NO <sub>3</sub>                | [M+H] <sup>+</sup> | Lipids     | 9111   | 967342  | 3236944  | 3167537  | 345345  |
| 754 | LysoPE 18:0                                                                      | C <sub>11</sub> H <sub>14</sub> N <sub>2</sub> O <sub>3</sub> | [M+H] <sup>+</sup> | Lipids     | 21315  | 925651  | 525602   | 771513   | 351671  |
| 755 | LysoPE 15:1(2n isomer)                                                           | C <sub>9</sub> H <sub>11</sub> NO <sub>3</sub>                | [M+H] <sup>+</sup> | Lipids     | 9      | 19208   | 28818    | 27599    | 8383    |
| 756 | LysoPE 15:0(2n isomer)                                                           | C <sub>11</sub> H <sub>14</sub> N <sub>2</sub> O <sub>3</sub> | [M+H] <sup>+</sup> | Lipids     | 13324  | 1440020 | 1917345  | 1990628  | 881679  |
| 757 | LysoPE 18:3(2n isomer)                                                           | C <sub>9</sub> H <sub>11</sub> NO <sub>3</sub>                | [M+H] <sup>+</sup> | Lipids     | 58646  | 7359867 | 31504465 | 30376950 | 2415776 |
| 758 | LysoPE 15:0                                                                      | C <sub>11</sub> H <sub>14</sub> N <sub>2</sub> O <sub>3</sub> | [M+H] <sup>+</sup> | Lipids     | 71666  | 6772449 | 2040992  | 2806701  | 3470200 |
| 759 | LysoPE 16:0(2n isomer)                                                           | C <sub>9</sub> H <sub>11</sub> NO <sub>3</sub>                | [M+H] <sup>+</sup> | Lipids     | 66447  | 3179601 | 2825686  | 3732832  | 2066117 |
| 760 | LysoPE 20:3(2n isomer)                                                           | C <sub>11</sub> H <sub>14</sub> N <sub>2</sub> O <sub>3</sub> | [M+H] <sup>+</sup> | Lipids     | 9      | 23310   | 16947    | 20496    | 10682   |
| 761 | LysoPE 17:1                                                                      | C <sub>9</sub> H <sub>11</sub> NO <sub>3</sub>                | [M+H] <sup>+</sup> | Lipids     | 5376   | 33999   | 537527   | 315398   | 52369   |
| 762 | LysoPE 16:1(2n isomer)                                                           | C <sub>11</sub> H <sub>14</sub> N <sub>2</sub> O <sub>3</sub> | [M+H] <sup>+</sup> | Lipids     | 19544  | 98512   | 1079431  | 887452   | 49426   |
| 763 | LysoPE 15:1                                                                      | C <sub>9</sub> H <sub>11</sub> NO <sub>3</sub>                | [M+H] <sup>+</sup> | Lipids     | 9      | 121027  | 47688    | 60625    | 41131   |
| 764 | LysoPE 18:3                                                                      | C <sub>11</sub> H <sub>14</sub> N <sub>2</sub> O <sub>3</sub> | [M+H] <sup>+</sup> | Lipids     | 104531 | 7952277 | 34040836 | 33112155 | 2409776 |
| 765 | LysoPE 20:2(2n isomer)                                                           | C <sub>9</sub> H <sub>11</sub> NO <sub>3</sub>                | [M+H] <sup>+</sup> | Lipids     | 9      | 108777  | 299015   | 289297   | 32833   |
| 766 | LysoPE 20:4(2n isomer)                                                           | C <sub>11</sub> H <sub>14</sub> N <sub>2</sub> O <sub>3</sub> | [M+H] <sup>+</sup> | Lipids     | 9      | 9795    | 21412    | 19142    | 5141    |
| 767 | LysoPE 18:4                                                                      | C <sub>9</sub> H <sub>11</sub> NO <sub>3</sub>                | [M+H] <sup>+</sup> | Lipids     | 9      | 9       | 33807    | 38438    | 9       |
| 768 | LysoPE 16:1                                                                      | C <sub>11</sub> H <sub>14</sub> N <sub>2</sub> O <sub>3</sub> | [M+H] <sup>+</sup> | Lipids     | 9998   | 50917   | 257313   | 172033   | 66509   |
| 769 | LysoPE 20:3                                                                      | C <sub>9</sub> H <sub>11</sub> NO <sub>3</sub>                | [M+H] <sup>+</sup> | Lipids     | 9      | 23023   | 15887    | 20884    | 9705    |
| 770 | 3-Hydroxyurs-12-en-28-oic acid (Ursolic acid)                                    | C <sub>11</sub> H <sub>14</sub> N <sub>2</sub> O <sub>3</sub> | [M-H] <sup>-</sup> | Terpenoids | 73062  | 24218   | 22570    | 28326    | 31128   |
| 771 | 12,13-Dihydroursolic acid                                                        | C <sub>9</sub> H <sub>11</sub> NO <sub>3</sub>                | [M+H] <sup>+</sup> | Terpenoids | 21990  | 39089   | 37312    | 40989    | 39275   |
| 772 | 3-(Acetyloxy)-13,15-dihydroxyoleanan-12-one (Rubiprasin A)(iso-01)               | C <sub>11</sub> H <sub>14</sub> N <sub>2</sub> O <sub>3</sub> | [M+H] <sup>+</sup> | Terpenoids | 17501  | 45640   | 20967    | 43010    | 31292   |
| 773 | 24,30-Dihydroxy-12(13)-ene-lupeol*                                               | C <sub>9</sub> H <sub>11</sub> NO <sub>3</sub>                | [M-H] <sup>-</sup> | Terpenoids | 337862 | 114660  | 213338   | 423100   | 85197   |
| 774 | 2,3,23-Trihydroxyolean-12-ene-28,29-dioic acid 29-methyl ester (Phytolaccagenin) | C <sub>11</sub> H <sub>14</sub> N <sub>2</sub> O <sub>3</sub> | [M-H] <sup>-</sup> | Terpenoids | 52821  | 108698  | 77243    | 77803    | 76876   |

|     |                                                                                    |                                                               |                    |            |        |        |        |         |        |
|-----|------------------------------------------------------------------------------------|---------------------------------------------------------------|--------------------|------------|--------|--------|--------|---------|--------|
| 775 | 9,19-Cyclolanost-24-en-3-ol<br>(Cycloartenol)                                      | C <sub>9</sub> H <sub>11</sub> NO <sub>3</sub>                | [M+H] <sup>+</sup> | Terpenoids | 13796  | 11939  | 12566  | 12493   | 12689  |
| 776 | 2,19-Dihydroxy-3-oxours-12-en-28-oic acid                                          | C <sub>11</sub> H <sub>14</sub> N <sub>2</sub> O <sub>3</sub> | [M-H] <sup>-</sup> | Terpenoids | 110346 | 146919 | 301260 | 328282  | 180637 |
| 777 | 2,3,16,21-Tetrahydroxyolean-12-en-28-oic acid (Platycogenic acid C)                | C <sub>9</sub> H <sub>11</sub> NO <sub>3</sub>                | [M-H] <sup>-</sup> | Terpenoids | 239916 | 80970  | 997892 | 1149909 | 103823 |
| 778 | 3-Hydroxylup-20(29)-en-28-oic acid (Betulinic acid)                                | C <sub>11</sub> H <sub>14</sub> N <sub>2</sub> O <sub>3</sub> | [M+H] <sup>+</sup> | Terpenoids | 22841  | 22560  | 37267  | 39667   | 20902  |
| 779 | 3-Hydroxy-11-oxours-12-en-28-oic acid (11-Keto-ursolic acid)                       | C <sub>9</sub> H <sub>11</sub> NO <sub>3</sub>                | [M+H] <sup>+</sup> | Terpenoids | 34461  | 26067  | 30019  | 34781   | 25452  |
| 780 | 19-Hydroxy-2-(hydroxymethyl)-A(1)-norursa-2,12-dien-28-oic acid (Hyptadienic acid) | C <sub>11</sub> H <sub>14</sub> N <sub>2</sub> O <sub>3</sub> | [M-H] <sup>-</sup> | Terpenoids | 22540  | 23084  | 21943  | 24882   | 33396  |
| 781 | 3-Hydroxyolean-12-en-28-oic acid (Oleanolic acid)*                                 | C <sub>9</sub> H <sub>11</sub> NO <sub>3</sub>                | [M-H] <sup>-</sup> | Terpenoids | 68951  | 49054  | 60279  | 71913   | 37601  |
| 782 | 2,3,6,23-Tetrahydroxyurs-12-en-28-oic acid (Madecassic acid)                       | C <sub>11</sub> H <sub>14</sub> N <sub>2</sub> O <sub>3</sub> | [M-H] <sup>-</sup> | Terpenoids | 9951   | 16452  | 13976  | 13474   | 11356  |
| 783 | Lup-20(29)-en-3-one (Lupenone)                                                     | C <sub>9</sub> H <sub>11</sub> NO <sub>3</sub>                | [M+H] <sup>+</sup> | Terpenoids | 42165  | 34929  | 44415  | 45771   | 29567  |
| 784 | 3,25-Epoxy-3-hydroxyolean-12-en-28-oic acid (Semimoronic acid)                     | C <sub>11</sub> H <sub>14</sub> N <sub>2</sub> O <sub>3</sub> | [M-H] <sup>-</sup> | Terpenoids | 25640  | 162020 | 42512  | 69239   | 44070  |
| 785 | Urs-12(13)-en-3-one-28-oic acid*                                                   | C <sub>9</sub> H <sub>11</sub> NO <sub>3</sub>                | [M-H] <sup>-</sup> | Terpenoids | 14305  | 15077  | 47432  | 66213   | 7739   |
| 786 | 3-Oxolup-20(29)-en-28-oic                                                          | C <sub>11</sub> H <sub>14</sub> N <sub>2</sub> O <sub>3</sub> | [M-H] <sup>-</sup> | Terpenoids | 21639  | 25200  | 44174  | 50802   | 14954  |

|     |                                                                |                                                               |                    |            |          |          |          |          |          |
|-----|----------------------------------------------------------------|---------------------------------------------------------------|--------------------|------------|----------|----------|----------|----------|----------|
|     | acid (Betulonic acid)*                                         |                                                               |                    |            |          |          |          |          |          |
|     | Oleanolic                                                      |                                                               |                    |            |          |          |          |          |          |
| 787 | acid-3-O-xylosyl(1→3)glucuronide                               | C <sub>9</sub> H <sub>11</sub> NO <sub>3</sub>                | [M-H] <sup>-</sup> | Terpenoids | 9        | 9        | 61137    | 73778    | 9        |
| 788 | 6-Demethoxycapillarisin                                        | C <sub>11</sub> H <sub>14</sub> N <sub>2</sub> O <sub>3</sub> | [M+H] <sup>+</sup> | Others     | 131235   | 191752   | 106002   | 120051   | 58101    |
| 789 | 6,7-dimethoxy-2-[2-(4'-hydroxy-3'-methoxyphenyl)ethyl]chromone | C <sub>9</sub> H <sub>11</sub> NO <sub>3</sub>                | [M+H] <sup>+</sup> | Others     | 612183   | 363300   | 308093   | 393575   | 252076   |
| 790 | Capillarisin                                                   | C <sub>11</sub> H <sub>14</sub> N <sub>2</sub> O <sub>3</sub> | [M+H] <sup>+</sup> | Others     | 18125    | 7367     | 43920    | 27729    | 21636    |
| 791 | 6,7-dimethoxy-2-[2-phenylethyl]chromone                        | C <sub>9</sub> H <sub>11</sub> NO <sub>3</sub>                | [M+H] <sup>+</sup> | Others     | 29056    | 25077    | 26440    | 38439    | 45799    |
| 792 | 3,5,7,4'-Tetrahydroxy-Coumaronochromone                        | C <sub>11</sub> H <sub>14</sub> N <sub>2</sub> O <sub>3</sub> | [M+H] <sup>+</sup> | Others     | 165778   | 95425    | 102106   | 86593    | 122551   |
| 793 | L-Tyramine                                                     | C <sub>9</sub> H <sub>11</sub> NO <sub>3</sub>                | [M+H] <sup>+</sup> | Alkaloids  | 2861643  | 4857068  | 6042149  | 5352855  | 1899300  |
| 794 | N-Acetylcadaverine                                             | C <sub>11</sub> H <sub>14</sub> N <sub>2</sub> O <sub>3</sub> | [M+H] <sup>+</sup> | Alkaloids  | 722001   | 739980   | 698775   | 738911   | 690905   |
| 795 | Histidinol                                                     | C <sub>9</sub> H <sub>11</sub> NO <sub>3</sub>                | [M+H] <sup>+</sup> | Alkaloids  | 23745299 | 23656103 | 24234559 | 25603944 | 25308036 |
| 796 | Agmatine                                                       | C <sub>11</sub> H <sub>14</sub> N <sub>2</sub> O <sub>3</sub> | [M+H] <sup>+</sup> | Alkaloids  | 508623   | 302729   | 346962   | 463767   | 137711   |
| 797 | Cadaverine                                                     | C <sub>9</sub> H <sub>11</sub> NO <sub>3</sub>                | [M+H] <sup>+</sup> | Alkaloids  | 25025205 | 922425   | 2253149  | 1078738  | 267855   |
| 798 | octadecadienoic acid amide                                     | C <sub>11</sub> H <sub>14</sub> N <sub>2</sub> O <sub>3</sub> | [M+H] <sup>+</sup> | Alkaloids  | 824144   | 1061680  | 2945901  | 1391631  | 592930   |
| 799 | N-Acetylputrescine                                             | C <sub>9</sub> H <sub>11</sub> NO <sub>3</sub>                | [M+H] <sup>+</sup> | Alkaloids  | 490848   | 298513   | 330099   | 437654   | 116406   |
| 800 | 4,5,6-Trihydroxy-2-cyclohexen-1-ylideneacetonitrile            | C <sub>11</sub> H <sub>14</sub> N <sub>2</sub> O <sub>3</sub> | [M+H] <sup>+</sup> | Alkaloids  | 458003   | 191203   | 212686   | 299244   | 111703   |
| 801 | Diethanolamine                                                 | C <sub>9</sub> H <sub>11</sub> NO <sub>3</sub>                | [M+H] <sup>+</sup> | Alkaloids  | 218416   | 121385   | 121705   | 132457   | 72685    |
| 802 | N-(4-oxopentyl)-acetamide                                      | C <sub>11</sub> H <sub>14</sub> N <sub>2</sub> O <sub>3</sub> | [M+H] <sup>+</sup> | Alkaloids  | 2062242  | 2484507  | 1820018  | 2017658  | 2496296  |
| 803 | N-Benzylmethyleneisomethylamine                                | C <sub>9</sub> H <sub>11</sub> NO <sub>3</sub>                | [M+H] <sup>+</sup> | Alkaloids  | 8372393  | 3528322  | 3900367  | 5357435  | 1732641  |
| 804 | N-benzylformamide                                              | C <sub>11</sub> H <sub>14</sub> N <sub>2</sub> O <sub>3</sub> | [M+H] <sup>+</sup> | Alkaloids  | 1286402  | 739081   | 947490   | 1180580  | 467692   |
| 805 | N-(4-hydroxyphenethyl)cinna                                    | C <sub>9</sub> H <sub>11</sub> NO <sub>3</sub>                | [M+H] <sup>+</sup> | Alkaloids  | 1263822  | 1776788  | 1756357  | 1204566  | 1023415  |

|     |                                            |                                                               |                    |           |          |               |          |               |           |
|-----|--------------------------------------------|---------------------------------------------------------------|--------------------|-----------|----------|---------------|----------|---------------|-----------|
|     | mamide                                     |                                                               |                    |           |          |               |          |               |           |
| 806 | N-benzoyl-2-aminoethyl-β-D-glucopyranoside | C <sub>11</sub> H <sub>14</sub> N <sub>2</sub> O <sub>3</sub> | [M+H] <sup>+</sup> | Alkaloids | 1286810  | 846867        | 1603392  | 2322999       | 6041195   |
| 807 | N-(4-Aminobutyl)benzamide                  | C <sub>9</sub> H <sub>11</sub> NO <sub>3</sub>                | [M+H] <sup>+</sup> | Alkaloids | 127585   | 141344        | 251852   | 190813        | 183543    |
| 808 | Choline                                    | C <sub>11</sub> H <sub>14</sub> N <sub>2</sub> O <sub>3</sub> | [M] <sup>+</sup>   | Alkaloids | 28638902 | 24020326      | 14735449 | 18738154      | 11903582  |
| 809 | Betaine                                    | C <sub>9</sub> H <sub>11</sub> NO <sub>3</sub>                | [M+H] <sup>+</sup> | Alkaloids | 36785302 | 5098086       | 3583731  | 4372855       | 2589667   |
| 810 | 3-amino-2-naphthoic acid                   | C <sub>11</sub> H <sub>14</sub> N <sub>2</sub> O <sub>3</sub> | [M+H] <sup>+</sup> | Alkaloids | 7918329  | 4015147       | 4220738  | 5471667       | 2666672   |
| 811 | N-Oleoylethanolamine                       | C <sub>9</sub> H <sub>11</sub> NO <sub>3</sub>                | [M+H] <sup>+</sup> | Alkaloids | 843118   | 219203        | 203662   | 223221        | 207262    |
| 812 | Imidazole-4-Acetic Acid*                   | C <sub>11</sub> H <sub>14</sub> N <sub>2</sub> O <sub>3</sub> | [M+H] <sup>+</sup> | Alkaloids | 355209   | 369099        | 326037   | 278142        | 504356    |
| 813 | N-Isopentenyl-6-hydroxydendrooxinium       | C <sub>9</sub> H <sub>11</sub> NO <sub>3</sub>                | [M] <sup>+</sup>   | Alkaloids | 43961    | 55477         | 40341    | 51112         | 44448     |
| 814 | 10-Formyltetrahydrofolic Acid              | C <sub>11</sub> H <sub>14</sub> N <sub>2</sub> O <sub>3</sub> | [M+H] <sup>+</sup> | Alkaloids | 317441   | 273802        | 246104   | 298532        | 175722    |
| 815 | Nicotianamine                              | C <sub>9</sub> H <sub>11</sub> NO <sub>3</sub>                | [M+H] <sup>+</sup> | Alkaloids | 264561   | 292214        | 190900   | 162584        | 84440     |
| 816 | Dendrobin A                                | C <sub>11</sub> H <sub>14</sub> N <sub>2</sub> O <sub>3</sub> | [M+H] <sup>+</sup> | Alkaloids | 5013534  | 8628759       | 8046617  | 7513748       | 6437899   |
| 817 | Spermine                                   | C <sub>9</sub> H <sub>11</sub> NO <sub>3</sub>                | [M+H] <sup>+</sup> | Alkaloids | 5187317  | 6949988       | 9163109  | 5246914       | 6504102   |
| 818 | L-Azetidine-2-carboxylic acid              | C <sub>11</sub> H <sub>14</sub> N <sub>2</sub> O <sub>3</sub> | [M+H] <sup>+</sup> | Alkaloids | 299384   | 248939        | 241844   | 227741        | 125186    |
| 819 | m-Aminophenylacetylene                     | C <sub>9</sub> H <sub>11</sub> NO <sub>3</sub>                | [M+H] <sup>+</sup> | Alkaloids | 97318    | 52665         | 64880    | 79781         | 38914     |
| 820 | Spermidine                                 | C <sub>11</sub> H <sub>14</sub> N <sub>2</sub> O <sub>3</sub> | [M+H] <sup>+</sup> | Alkaloids | 12486    | 13381         | 15711    | 9             | 9         |
| 821 | Imidazol-1-yl-acetic acid*                 | C <sub>9</sub> H <sub>11</sub> NO <sub>3</sub>                | [M+H] <sup>+</sup> | Alkaloids | 505349   | 477601        | 377921   | 453821        | 404129    |
| 822 | O-Phosphorylethanolamine                   | C <sub>11</sub> H <sub>14</sub> N <sub>2</sub> O <sub>3</sub> | [M-H] <sup>-</sup> | Alkaloids | 1868     | 28947         | 54873    | 58416         | 50285     |
| 823 | DL-2-Aminoadipic acid                      | C <sub>9</sub> H <sub>11</sub> NO <sub>3</sub>                | [M+H] <sup>+</sup> | Alkaloids | 793043   | 543073        | 533748   | 691877        | 669264    |
| 824 | 2(3H)-Benzothiazolone                      | C <sub>11</sub> H <sub>14</sub> N <sub>2</sub> O <sub>3</sub> | [M-H] <sup>-</sup> | Alkaloids | 14509    | 16544         | 19335    | 14851         | 16217     |
| 825 | (E)-Cinnamamide                            | C <sub>9</sub> H <sub>11</sub> NO <sub>3</sub>                | [M+H] <sup>+</sup> | Alkaloids | 9        | 17379         | 27305    | 18183         | 19483     |
| 826 | 2-Benzoxazolinone                          | C <sub>11</sub> H <sub>14</sub> N <sub>2</sub> O <sub>3</sub> | [M+H] <sup>+</sup> | Alkaloids | 9        | 11362         | 15246    | 15021         | 64244     |
| 827 | Lumichrome                                 | C <sub>9</sub> H <sub>11</sub> NO <sub>3</sub>                | [M+H] <sup>+</sup> | Alkaloids | 31210    | 36139         | 29412    | 40123         | 19906     |
| 828 | 3-Dehydro-L-Threonic Acid*                 | C <sub>11</sub> H <sub>14</sub> N <sub>2</sub> O <sub>3</sub> | [M-H] <sup>-</sup> | Others    | 82944140 | 12461551<br>2 | 92293778 | 10404493<br>5 | 126848596 |
| 829 | D-Mannose*                                 | C <sub>9</sub> H <sub>11</sub> NO <sub>3</sub>                | [M-H] <sup>-</sup> | Others    | 25332971 | 40548940      | 38046145 | 34851309      | 39354400  |

|     |                                    |                                                               |                     |        |          |          |          |          |          |
|-----|------------------------------------|---------------------------------------------------------------|---------------------|--------|----------|----------|----------|----------|----------|
| 830 | D-Glucosamine                      | C <sub>11</sub> H <sub>14</sub> N <sub>2</sub> O <sub>3</sub> | [M+H] <sup>+</sup>  | Others | 3065754  | 3802284  | 3176561  | 3600843  | 3077281  |
| 831 | D-Sucrose*                         | C <sub>9</sub> H <sub>11</sub> NO <sub>3</sub>                | [M-H]-              | Others | 632794   | 2506363  | 2500975  | 2305366  | 3703231  |
| 832 | D-Galactaric acid*                 | C <sub>11</sub> H <sub>14</sub> N <sub>2</sub> O <sub>3</sub> | [M-H]-              | Others | 1167054  | 777204   | 680833   | 747384   | 607997   |
| 833 | N-trans-ferulic tyramine           | C <sub>9</sub> H <sub>11</sub> NO <sub>3</sub>                | [M+H] <sup>+</sup>  | Others | 11112085 | 12756380 | 16272710 | 8999255  | 13020371 |
| 834 | D-Panthenol                        | C <sub>11</sub> H <sub>14</sub> N <sub>2</sub> O <sub>3</sub> | [M+H] <sup>+</sup>  | Others | 1306607  | 174679   | 125645   | 74606    | 102804   |
| 835 | D-Ribose                           | C <sub>9</sub> H <sub>11</sub> NO <sub>3</sub>                | [M-H]-              | Others | 451156   | 325823   | 497729   | 667002   | 364232   |
| 836 | D-Glucose 6-phosphate*             | C <sub>11</sub> H <sub>14</sub> N <sub>2</sub> O <sub>3</sub> | [M-H]-              | Others | 791768   | 3143226  | 3212522  | 3210091  | 3092288  |
| 837 | D-Fructose 6-Phosphate*            | C <sub>9</sub> H <sub>11</sub> NO <sub>3</sub>                | [M-H]-              | Others | 795040   | 2618093  | 2706718  | 2384406  | 2107586  |
| 838 | sorbose                            | C <sub>11</sub> H <sub>14</sub> N <sub>2</sub> O <sub>3</sub> | [M-H]-              | Others | 23977177 | 37730702 | 36830080 | 33259643 | 37091583 |
| 839 | D-Maltotetraose                    | C <sub>9</sub> H <sub>11</sub> NO <sub>3</sub>                | [M-H]-              | Others | 113135   | 351215   | 185965   | 217353   | 141431   |
| 840 | D-Threose                          | C <sub>11</sub> H <sub>14</sub> N <sub>2</sub> O <sub>3</sub> | [M+H] <sup>+</sup>  | Others | 354345   | 615800   | 758999   | 758997   | 269617   |
| 841 | Ribitol*                           | C <sub>9</sub> H <sub>11</sub> NO <sub>3</sub>                | [M-H]-              | Others | 568355   | 151956   | 219304   | 142712   | 87015    |
| 842 | Xylitol*                           | C <sub>11</sub> H <sub>14</sub> N <sub>2</sub> O <sub>3</sub> | [M-H]-              | Others | 568355   | 151956   | 219304   | 142712   | 87015    |
| 843 | D-Trehalose*                       | C <sub>9</sub> H <sub>11</sub> NO <sub>3</sub>                | [M-H]-              | Others | 679407   | 1592317  | 1494817  | 1387408  | 1755767  |
| 844 | 2,3-Dihydroxypropanal              | C <sub>11</sub> H <sub>14</sub> N <sub>2</sub> O <sub>3</sub> | [M-H]-              | Others | 39710    | 27905    | 305166   | 343719   | 28532    |
| 845 | 1,6-anhydro-β-D-glucose            | C <sub>9</sub> H <sub>11</sub> NO <sub>3</sub>                | [M-H]-              | Others | 1421460  | 1403577  | 1191871  | 1068921  | 1073986  |
| 846 | Glucose-1-phosphate*               | C <sub>11</sub> H <sub>14</sub> N <sub>2</sub> O <sub>3</sub> | [M-H]-              | Others | 844724   | 3322262  | 3251556  | 3383177  | 3050557  |
| 847 | D-Galactose*                       | C <sub>9</sub> H <sub>11</sub> NO <sub>3</sub>                | [M-H]-              | Others | 13626786 | 26914859 | 23162525 | 21361402 | 26633789 |
| 848 | Pantothenol                        | C <sub>11</sub> H <sub>14</sub> N <sub>2</sub> O <sub>3</sub> | [M-H]-              | Others | 95239    | 16504    | 9693     | 10260    | 13726    |
| 849 | Trehalose 6-phosphate              | C <sub>9</sub> H <sub>11</sub> NO <sub>3</sub>                | [M-H]-              | Others | 106263   | 252366   | 228787   | 224643   | 317652   |
| 850 | D-Sorbitol                         | C <sub>11</sub> H <sub>14</sub> N <sub>2</sub> O <sub>3</sub> | [M-H]-              | Others | 1913803  | 411419   | 3961135  | 3627399  | 299595   |
| 851 | 1,5-Anhydro-D-glucitol             | C <sub>9</sub> H <sub>11</sub> NO <sub>3</sub>                | [M-H]-              | Others | 290181   | 234977   | 210770   | 224406   | 219752   |
| 852 | Isomaltulose*                      | C <sub>11</sub> H <sub>14</sub> N <sub>2</sub> O <sub>3</sub> | [M-H]-              | Others | 1252285  | 3260935  | 2814051  | 2751753  | 3068876  |
| 853 | N-Acetyl-D-glucosamine-1-phosphate | C <sub>9</sub> H <sub>11</sub> NO <sub>3</sub>                | [M-H]-              | Others | 75618    | 43438    | 63843    | 47281    | 35255    |
| 854 | Maltotriose                        | C <sub>11</sub> H <sub>14</sub> N <sub>2</sub> O <sub>3</sub> | [M+Na] <sup>+</sup> | Others | 107965   | 225989   | 114161   | 116628   | 122657   |
| 855 | D-Fructose*                        | C <sub>9</sub> H <sub>11</sub> NO <sub>3</sub>                | [M-H]-              | Others | 24022843 | 36228222 | 33867029 | 31186326 | 36339381 |
| 856 | 3-Phospho-D-glyceric acid          | C <sub>11</sub> H <sub>14</sub> N <sub>2</sub> O <sub>3</sub> | [M-H]-              | Others | 115972   | 173041   | 169499   | 144291   | 48623    |

|     |                             |                                                               |                    |        |          |          |          |          |          |
|-----|-----------------------------|---------------------------------------------------------------|--------------------|--------|----------|----------|----------|----------|----------|
| 857 | Maltitol                    | C <sub>9</sub> H <sub>11</sub> NO <sub>3</sub>                | [M-H]-             | Others | 111703   | 114928   | 117297   | 110119   | 104753   |
| 858 | Glucarate O-Phosphoric acid | C <sub>11</sub> H <sub>14</sub> N <sub>2</sub> O <sub>3</sub> | [M-H]-             | Others | 2513154  | 588905   | 1236199  | 782216   | 565448   |
| 859 | D-Glucosamine 1-phosphate   | C <sub>9</sub> H <sub>11</sub> NO <sub>3</sub>                | [M-H]-             | Others | 13709    | 40311    | 89300    | 115090   | 12033    |
| 860 | N-Acetyl-D-galactosamine    | C <sub>11</sub> H <sub>14</sub> N <sub>2</sub> O <sub>3</sub> | [M+H] <sup>+</sup> | Others | 223056   | 147042   | 171448   | 269681   | 230837   |
| 861 | Inositol*                   | C <sub>9</sub> H <sub>11</sub> NO <sub>3</sub>                | [M-H]-             | Others | 23976122 | 36620181 | 35030553 | 31456380 | 35330439 |
| 862 | D-Galacturonic acid*        | C <sub>11</sub> H <sub>14</sub> N <sub>2</sub> O <sub>3</sub> | [M-H]-             | Others | 2731714  | 1490487  | 7284116  | 3776316  | 534142   |
| 863 | D-Xylonic acid              | C <sub>9</sub> H <sub>11</sub> NO <sub>3</sub>                | [M-H]-             | Others | 19757263 | 29534633 | 33052559 | 31003428 | 35883487 |
| 864 | D-Glucose*                  | C <sub>11</sub> H <sub>14</sub> N <sub>2</sub> O <sub>3</sub> | [M-H]-             | Others | 25828681 | 38168304 | 36066324 | 31593651 | 36695004 |
| 865 | Stachyose                   | C <sub>9</sub> H <sub>11</sub> NO <sub>3</sub>                | [M-H]-             | Others | 32235    | 182893   | 110596   | 125194   | 75237    |
| 866 | Galactinol                  | C <sub>11</sub> H <sub>14</sub> N <sub>2</sub> O <sub>3</sub> | [M-H]-             | Others | 1222368  | 4486249  | 5157653  | 4196414  | 7230391  |
| 867 | D-Arabitol*                 | C <sub>9</sub> H <sub>11</sub> NO <sub>3</sub>                | [M-H]-             | Others | 2200594  | 149868   | 320439   | 491259   | 84805    |
| 868 | Sedoheptulose               | C <sub>11</sub> H <sub>14</sub> N <sub>2</sub> O <sub>3</sub> | [M-H]-             | Others | 1084767  | 681028   | 578809   | 622364   | 462179   |
| 869 | DL-Xylose                   | C <sub>9</sub> H <sub>11</sub> NO <sub>3</sub>                | [M-H]-             | Others | 383766   | 490909   | 485607   | 473304   | 512907   |
| 870 | D-Mannitol*                 | C <sub>11</sub> H <sub>14</sub> N <sub>2</sub> O <sub>3</sub> | [M-H]-             | Others | 641091   | 110036   | 1391631  | 1291294  | 75926    |
| 871 | D-Sedoheptuose 7-phosphate  | C <sub>9</sub> H <sub>11</sub> NO <sub>3</sub>                | [M-H]-             | Others | 1239109  | 358713   | 913205   | 626833   | 534233   |
| 872 | L-Fucitol                   | C <sub>11</sub> H <sub>14</sub> N <sub>2</sub> O <sub>3</sub> | [M-H]-             | Others | 2407388  | 4734974  | 5298522  | 4921029  | 5268780  |
| 873 | D-Melezitose                | C <sub>9</sub> H <sub>11</sub> NO <sub>3</sub>                | [M-H]-             | Others | 25698    | 77098    | 91033    | 71651    | 115228   |
| 874 | D-Saccharic acid*           | C <sub>11</sub> H <sub>14</sub> N <sub>2</sub> O <sub>3</sub> | [M-H]-             | Others | 1200477  | 830571   | 705921   | 755134   | 648771   |
| 875 | D-Glucuronic acid*          | C <sub>9</sub> H <sub>11</sub> NO <sub>3</sub>                | [M-H]-             | Others | 2970755  | 1710430  | 8083666  | 3709063  | 553114   |
| 876 | N-Acetyl-D-mannosamine      | C <sub>11</sub> H <sub>14</sub> N <sub>2</sub> O <sub>3</sub> | [M+H] <sup>+</sup> | Others | 205530   | 126106   | 94927    | 78613    | 37938    |
| 877 | Gluconic acid               | C <sub>9</sub> H <sub>11</sub> NO <sub>3</sub>                | [M-H]-             | Others | 18599832 | 4620462  | 4167175  | 6332270  | 2721121  |
| 878 | Melibiose                   | C <sub>11</sub> H <sub>14</sub> N <sub>2</sub> O <sub>3</sub> | [M-H]-             | Others | 796098   | 1232773  | 1166940  | 1090614  | 1475192  |
| 879 | D-Threonic Acid             | C <sub>9</sub> H <sub>11</sub> NO <sub>3</sub>                | [M-H]-             | Others | 2267691  | 2577698  | 2025456  | 2111806  | 2818881  |
| 880 | D-Erythrose-4-phosphate     | C <sub>11</sub> H <sub>14</sub> N <sub>2</sub> O <sub>3</sub> | [M-H]-             | Others | 23816    | 28834    | 95603    | 140955   | 20964    |
| 881 | Dulcitol*                   | C <sub>9</sub> H <sub>11</sub> NO <sub>3</sub>                | [M-H]-             | Others | 2284114  | 377644   | 4637352  | 4634736  | 267094   |
| 882 | D-Panose*                   | C <sub>11</sub> H <sub>14</sub> N <sub>2</sub> O <sub>3</sub> | [M-H]-             | Others | 220515   | 268566   | 246156   | 274056   | 169787   |
| 883 | D-Glucurono-6,3-lactone     | C <sub>9</sub> H <sub>11</sub> NO <sub>3</sub>                | [M-H]-             | Others | 86880    | 119293   | 133073   | 138991   | 115375   |
| 884 | Raffinose*                  | C <sub>11</sub> H <sub>14</sub> N <sub>2</sub> O <sub>3</sub> | [M-H]-             | Others | 168675   | 201576   | 171991   | 180300   | 162623   |



|     |                                           |                                                               |                    |            |         |         |         |         |         |
|-----|-------------------------------------------|---------------------------------------------------------------|--------------------|------------|---------|---------|---------|---------|---------|
| 885 | D-Cellobiose                              | C <sub>9</sub> H <sub>11</sub> NO <sub>3</sub>                | [M-H]-             | Others     | 381489  | 452445  | 366207  | 353664  | 229609  |
| 886 | Manninotriose                             | C <sub>11</sub> H <sub>14</sub> N <sub>2</sub> O <sub>3</sub> | [M-H]-             | Others     | 155576  | 119948  | 108980  | 117493  | 38285   |
| 887 | D-Maltose*                                | C <sub>9</sub> H <sub>11</sub> NO <sub>3</sub>                | [M-H]-             | Others     | 1175860 | 3032176 | 2667334 | 2396845 | 2844736 |
| 888 | D-Glucose 1,6-bisphosphate                | C <sub>11</sub> H <sub>14</sub> N <sub>2</sub> O <sub>3</sub> | [M-H]-             | Others     | 5802    | 10371   | 10873   | 14033   | 12414   |
| 889 | D-Arabinose                               | C <sub>9</sub> H <sub>11</sub> NO <sub>3</sub>                | [M-H]-             | Others     | 411667  | 546601  | 574493  | 480197  | 575691  |
| 890 | D-Pinitol                                 | C <sub>11</sub> H <sub>14</sub> N <sub>2</sub> O <sub>3</sub> | [M-H]-             | Others     | 3615966 | 2383662 | 7415562 | 9520922 | 982329  |
| 891 | D-Arabinono-1,4-lactone*                  | C <sub>9</sub> H <sub>11</sub> NO <sub>3</sub>                | [M-H]-             | Others     | 479748  | 264057  | 259428  | 323475  | 285657  |
| 892 | Rutinose                                  | C <sub>11</sub> H <sub>14</sub> N <sub>2</sub> O <sub>3</sub> | [M-H]-             | Others     | 273386  | 222541  | 213816  | 229707  | 120313  |
| 893 | Sucrose-6-phosphate                       | C <sub>9</sub> H <sub>11</sub> NO <sub>3</sub>                | [M-H]-             | Others     | 63133   | 128601  | 142087  | 147603  | 212029  |
| 894 | Lactobiose                                | C <sub>11</sub> H <sub>14</sub> N <sub>2</sub> O <sub>3</sub> | [M-H]-             | Others     | 88259   | 532857  | 614258  | 420814  | 1269946 |
| 895 | Verbascose                                | C <sub>9</sub> H <sub>11</sub> NO <sub>3</sub>                | [M-H]-             | Others     | 14083   | 154338  | 84649   | 125831  | 64540   |
| 896 | Sorbitol-6-phosphate                      | C <sub>11</sub> H <sub>14</sub> N <sub>2</sub> O <sub>3</sub> | [M-H]-             | Others     | 26546   | 30196   | 49115   | 56682   | 34427   |
| 897 | Blumenol C glucoside;<br>Byzantionoside B | C <sub>9</sub> H <sub>11</sub> NO <sub>3</sub>                | [M+H] <sup>+</sup> | Terpenoids | 69185   | 61112   | 54296   | 64599   | 56409   |
| 898 | Dehydrololiolide                          | C <sub>11</sub> H <sub>14</sub> N <sub>2</sub> O <sub>3</sub> | [M-H]-             | Terpenoids | 1392650 | 4661853 | 3911913 | 3395320 | 2411768 |
| 899 | Blumenol C                                | C <sub>9</sub> H <sub>11</sub> NO <sub>3</sub>                | [M+H] <sup>+</sup> | Terpenoids | 41902   | 37279   | 32340   | 39537   | 9       |
| 900 | α-Cyperone                                | C <sub>11</sub> H <sub>14</sub> N <sub>2</sub> O <sub>3</sub> | [M+H] <sup>+</sup> | Others     | 32851   | 32017   | 34503   | 32580   | 38605   |
| 901 | Dengibsin                                 | C <sub>9</sub> H <sub>11</sub> NO <sub>3</sub>                | [M-H]-             | Others     | 603660  | 1001403 | 1909923 | 1405629 | 2079862 |
| 902 | Cis-Jasmone                               | C <sub>11</sub> H <sub>14</sub> N <sub>2</sub> O <sub>3</sub> | [M-H]-             | Others     | 2183    | 15760   | 6842    | 5644    | 6571    |
| 903 | Roseoside                                 | C <sub>9</sub> H <sub>11</sub> NO <sub>3</sub>                | [M-H]-             | Others     | 79395   | 89746   | 216742  | 104146  | 9       |
| 904 | Acetosyringone                            | C <sub>11</sub> H <sub>14</sub> N <sub>2</sub> O <sub>3</sub> | [M-H]-             | Others     | 22582   | 21673   | 16781   | 26253   | 24383   |
| 905 | Orotic acid (Vitamin B13)                 | C <sub>9</sub> H <sub>11</sub> NO <sub>3</sub>                | [M-H]-             | Others     | 471448  | 161507  | 291430  | 296751  | 396248  |
| 906 | Pyridoxal                                 | C <sub>11</sub> H <sub>14</sub> N <sub>2</sub> O <sub>3</sub> | [M+H] <sup>+</sup> | Others     | 107945  | 51725   | 40988   | 34522   | 98456   |
| 907 | Pyridoxine                                | C <sub>9</sub> H <sub>11</sub> NO <sub>3</sub>                | [M+H] <sup>+</sup> | Others     | 4315621 | 780860  | 550282  | 723148  | 459129  |
| 908 | Isonicotinic acid                         | C <sub>11</sub> H <sub>14</sub> N <sub>2</sub> O <sub>3</sub> | [M+H] <sup>+</sup> | Others     | 1337842 | 383153  | 451551  | 508797  | 239618  |
| 909 | Nicotinamide                              | C <sub>9</sub> H <sub>11</sub> NO <sub>3</sub>                | [M+H] <sup>+</sup> | Others     | 502722  | 6462863 | 6006734 | 7265063 | 7961674 |
| 910 | Nicotinic acid (Vitamin B3)*              | C <sub>11</sub> H <sub>14</sub> N <sub>2</sub> O <sub>3</sub> | [M+H] <sup>+</sup> | Others     | 2454194 | 556119  | 694257  | 668680  | 354491  |
| 911 | Pyridoxine-5'-O-glucoside                 | C <sub>9</sub> H <sub>11</sub> NO <sub>3</sub>                | [M+H] <sup>+</sup> | Others     | 145266  | 453539  | 351560  | 321110  | 321281  |

|     |                                                |                                                               |                    |                       |         |         |         |         |         |
|-----|------------------------------------------------|---------------------------------------------------------------|--------------------|-----------------------|---------|---------|---------|---------|---------|
| 912 | Riboflavin (Vitamin B2)                        | C <sub>11</sub> H <sub>14</sub> N <sub>2</sub> O <sub>3</sub> | [M+H] <sup>+</sup> | Others                | 650606  | 777298  | 605355  | 809097  | 594298  |
| 913 | Menatetrenone (Vitamin K2)                     | C <sub>9</sub> H <sub>11</sub> NO <sub>3</sub>                | [M+H] <sup>+</sup> | Others                | 97617   | 145858  | 117174  | 140421  | 209993  |
| 914 | Nicotinate D-ribonucleoside                    | C <sub>11</sub> H <sub>14</sub> N <sub>2</sub> O <sub>3</sub> | [M] <sup>+</sup>   | Others                | 4192336 | 4276257 | 2612119 | 3732774 | 720266  |
| 915 | 4-Pyridoxic acid                               | C <sub>9</sub> H <sub>11</sub> NO <sub>3</sub>                | [M+H] <sup>+</sup> | Others                | 77595   | 50312   | 33935   | 53510   | 37309   |
| 916 | D-Pantothenic Acid                             | C <sub>11</sub> H <sub>14</sub> N <sub>2</sub> O <sub>3</sub> | [M-H] <sup>-</sup> | Others                | 1499740 | 1567709 | 1452262 | 1553594 | 1002127 |
| 917 | Erythorbic Acid; Isoascorbic Acid              | C <sub>9</sub> H <sub>11</sub> NO <sub>3</sub>                | [M-H] <sup>-</sup> | Others                | 528708  | 1089797 | 1154178 | 1405867 | 1778952 |
| 918 | 4-Oxoretinol                                   | C <sub>11</sub> H <sub>14</sub> N <sub>2</sub> O <sub>3</sub> | [M+H] <sup>+</sup> | Others                | 10153   | 6426    | 3422    | 5379    | 5766    |
| 919 | Dehydroascorbic acid                           | C <sub>9</sub> H <sub>11</sub> NO <sub>3</sub>                | [M-H] <sup>-</sup> | Others                | 729154  | 2150834 | 2364585 | 1548339 | 1746690 |
| 920 | Delta-Tocopherol                               | C <sub>11</sub> H <sub>14</sub> N <sub>2</sub> O <sub>3</sub> | [M+H] <sup>+</sup> | Others                | 4970    | 10644   | 9594    | 11386   | 31948   |
| 921 | N-(beta-D-Glucosyl)nicotinate                  | C <sub>9</sub> H <sub>11</sub> NO <sub>3</sub>                | [M+H] <sup>+</sup> | Others                | 61454   | 55585   | 52641   | 56968   | 41576   |
| 922 | Daphnin*                                       | C <sub>11</sub> H <sub>14</sub> N <sub>2</sub> O <sub>3</sub> | [M-H] <sup>-</sup> | Lignans and Coumarins | 125899  | 148544  | 195682  | 229514  | 88937   |
| 923 | Scopoletin-7-O-glucoside (Scopolin)<br>Esculin | C <sub>9</sub> H <sub>11</sub> NO <sub>3</sub>                | [M+H] <sup>+</sup> | Lignans and Coumarins | 55497   | 37915   | 26421   | 40181   | 23654   |
| 924 | (6,7-Dihydroxycoumarin-6-O-glucoside)*         | C <sub>11</sub> H <sub>14</sub> N <sub>2</sub> O <sub>3</sub> | [M-H] <sup>-</sup> | Lignans and Coumarins | 152843  | 142215  | 207123  | 244751  | 93270   |
| 925 | Isofraxidin-7-O-glucoside                      | C <sub>9</sub> H <sub>11</sub> NO <sub>3</sub>                | [M+H] <sup>+</sup> | Lignans and Coumarins | 29712   | 48949   | 64054   | 38069   | 69750   |
| 926 | Oxypeucedanin                                  | C <sub>11</sub> H <sub>14</sub> N <sub>2</sub> O <sub>3</sub> | [M+H] <sup>+</sup> | Lignans and Coumarins | 17487   | 39685   | 39190   | 38250   | 26802   |
| 927 | Osthole                                        | C <sub>9</sub> H <sub>11</sub> NO <sub>3</sub>                | [M+H] <sup>+</sup> | Lignans and Coumarins | 9168    | 11803   | 14905   | 9112    | 14827   |
| 928 | Esculetin-7-O-glucoside*                       | C <sub>11</sub> H <sub>14</sub> N <sub>2</sub> O <sub>3</sub> | [M-H] <sup>-</sup> | Lignans and Coumarins | 127195  | 136817  | 163953  | 223951  | 68625   |
| 929 | Fraxidin-8-O-glucoside                         | C <sub>9</sub> H <sub>11</sub> NO <sub>3</sub>                | [M+H] <sup>+</sup> | Lignans and Coumarins | 32265   | 65174   | 70764   | 42109   | 62244   |

|     |                                               |                                                               |                    |                       |          |          |          |          |          |
|-----|-----------------------------------------------|---------------------------------------------------------------|--------------------|-----------------------|----------|----------|----------|----------|----------|
| 930 | 6,7-Dihydroxy-4-methylcoumarin                | C <sub>11</sub> H <sub>14</sub> N <sub>2</sub> O <sub>3</sub> | [M+H] <sup>+</sup> | Lignans and Coumarins | 395349   | 468087   | 431470   | 675969   | 460299   |
| 931 | Nodakenin                                     | C <sub>9</sub> H <sub>11</sub> NO <sub>3</sub>                | [M-H] <sup>-</sup> | Lignans and Coumarins | 1030058  | 1430060  | 1265406  | 1183635  | 1147998  |
| 932 | Esculetin<br>(6,7-Dihydroxycoumarin)          | C <sub>11</sub> H <sub>14</sub> N <sub>2</sub> O <sub>3</sub> | [M-H] <sup>-</sup> | Lignans and Coumarins | 276711   | 490170   | 794944   | 705532   | 223152   |
| 933 | Fraxetin<br>(7,8-Dihydroxy-6-methoxycoumarin) | C <sub>9</sub> H <sub>11</sub> NO <sub>3</sub>                | [M+H] <sup>+</sup> | Lignans and Coumarins | 129035   | 181744   | 185142   | 157801   | 167685   |
| 934 | isofraxidin                                   | C <sub>11</sub> H <sub>14</sub> N <sub>2</sub> O <sub>3</sub> | [M+H] <sup>+</sup> | Lignans and Coumarins | 30869    | 36927    | 24113    | 22470    | 17908    |
| 935 | 7,8-Dihydroxy-4-phenylcoumarin                | C <sub>9</sub> H <sub>11</sub> NO <sub>3</sub>                | [M+H] <sup>+</sup> | Lignans and Coumarins | 9899     | 8014     | 11000    | 30904    | 34347    |
| 936 | 4-Hydroxycoumarin                             | C <sub>11</sub> H <sub>14</sub> N <sub>2</sub> O <sub>3</sub> | [M-H] <sup>-</sup> | Lignans and Coumarins | 24978    | 69612    | 86539    | 79723    | 122332   |
| 937 | Ayapin                                        | C <sub>9</sub> H <sub>11</sub> NO <sub>3</sub>                | [M-H] <sup>-</sup> | Lignans and Coumarins | 913814   | 795881   | 695973   | 860641   | 561446   |
| 938 | 5,7-dimethoxy-8-hydroxycoumarin               | C <sub>11</sub> H <sub>14</sub> N <sub>2</sub> O <sub>3</sub> | [M+H] <sup>+</sup> | Lignans and Coumarins | 17145    | 18006    | 30279    | 15384    | 15428    |
| 939 | Daphnetin                                     | C <sub>9</sub> H <sub>11</sub> NO <sub>3</sub>                | [M-H] <sup>-</sup> | Lignans and Coumarins | 33449    | 72044    | 106773   | 109394   | 27399    |
| 940 | Isoquinoline                                  | C <sub>11</sub> H <sub>14</sub> N <sub>2</sub> O <sub>3</sub> | [M+H] <sup>+</sup> | Alkaloids             | 141173   | 121084   | 129675   | 152138   | 65941    |
| 941 | 1-Methoxy-indole-3-acetamide                  | C <sub>9</sub> H <sub>11</sub> NO <sub>3</sub>                | [M+H] <sup>+</sup> | Alkaloids             | 32157124 | 17955815 | 18545135 | 21738941 | 12086011 |
| 942 | 1-Acetyl-β-carboline                          | C <sub>11</sub> H <sub>14</sub> N <sub>2</sub> O <sub>3</sub> | [M+H] <sup>+</sup> | Alkaloids             | 17010    | 27273    | 46322    | 86564    | 148739   |
| 943 | Methoxyindoleacetic acid                      | C <sub>9</sub> H <sub>11</sub> NO <sub>3</sub>                | [M+H] <sup>+</sup> | Alkaloids             | 613795   | 365189   | 357220   | 451654   | 250423   |
| 944 | 3-Indoleacrylic acid                          | C <sub>11</sub> H <sub>14</sub> N <sub>2</sub> O <sub>3</sub> | [M+H] <sup>+</sup> | Alkaloids             | 10074834 | 5211230  | 5415459  | 6705959  | 3435553  |
| 945 | Indole-3-carboxaldehyde                       | C <sub>9</sub> H <sub>11</sub> NO <sub>3</sub>                | [M+H] <sup>+</sup> | Alkaloids             | 114623   | 181796   | 125786   | 238000   | 198843   |
| 946 | Tryptamine                                    | C <sub>11</sub> H <sub>14</sub> N <sub>2</sub> O <sub>3</sub> | [M+H] <sup>+</sup> | Alkaloids             | 134350   | 81994    | 139223   | 96613    | 108205   |

|     |                                               |                                                               |                                          |           |          |          |         |          |         |
|-----|-----------------------------------------------|---------------------------------------------------------------|------------------------------------------|-----------|----------|----------|---------|----------|---------|
| 947 | 1-Methoxycarbonyl- $\beta$ -Carboline-N-Oxide | C <sub>9</sub> H <sub>11</sub> NO <sub>3</sub>                | [M+H] <sup>+</sup>                       | Alkaloids | 40281    | 81862    | 64226   | 56990    | 39629   |
| 948 | N-Acetyl-5-hydroxytryptamine                  | C <sub>11</sub> H <sub>14</sub> N <sub>2</sub> O <sub>3</sub> | [M+H] <sup>+</sup>                       | Alkaloids | 37825    | 27714    | 25384   | 19832    | 28710   |
| 949 | Indole                                        | C <sub>9</sub> H <sub>11</sub> NO <sub>3</sub>                | [M+H] <sup>+</sup>                       | Alkaloids | 48640    | 97571    | 83663   | 84068    | 57344   |
| 950 | N-Feruloyltryptamine                          | C <sub>11</sub> H <sub>14</sub> N <sub>2</sub> O <sub>3</sub> | [M+H] <sup>+</sup>                       | Alkaloids | 26814    | 62487    | 49443   | 68649    | 38185   |
| 951 | Indole-3-carboxylic acid*                     | C <sub>9</sub> H <sub>11</sub> NO <sub>3</sub>                | [M-H] <sup>-</sup>                       | Alkaloids | 477124   | 209579   | 231906  | 393152   | 174577  |
| 952 | Indole-5-carboxylic acid*                     | C <sub>11</sub> H <sub>14</sub> N <sub>2</sub> O <sub>3</sub> | [M-H] <sup>-</sup>                       | Alkaloids | 274851   | 149623   | 151089  | 221380   | 118529  |
| 953 | 3-Indoleacetonitrile                          | C <sub>9</sub> H <sub>11</sub> NO <sub>3</sub>                | [M+H] <sup>+</sup>                       | Alkaloids | 232302   | 201923   | 178441  | 263729   | 160947  |
| 954 | Acetryptine                                   | C <sub>11</sub> H <sub>14</sub> N <sub>2</sub> O <sub>3</sub> | [M+H] <sup>+</sup>                       | Alkaloids | 60978    | 16716    | 22787   | 22767    | 13788   |
| 955 | Indole-3-acetic acid (IAA)                    | C <sub>9</sub> H <sub>11</sub> NO <sub>3</sub>                | [M+H] <sup>+</sup>                       | Alkaloids | 29734    | 11835    | 17197   | 20328    | 13308   |
| 956 | 12-Oxo-phytodienoic acid                      | C <sub>11</sub> H <sub>14</sub> N <sub>2</sub> O <sub>3</sub> | [M-H] <sup>-</sup>                       | Lipids    | 291344   | 75915    | 111902  | 181270   | 20054   |
| 957 | 9-Oxo-10E,12Z-octadecadienoic acid            | C <sub>9</sub> H <sub>11</sub> NO <sub>3</sub>                | [M-H] <sup>-</sup>                       | Lipids    | 1200754  | 205193   | 147538  | 234899   | 79847   |
| 958 | 9-Hydroperoxy-9Z,11E-Octadecadienoic Acid     | C <sub>11</sub> H <sub>14</sub> N <sub>2</sub> O <sub>3</sub> | [M-H] <sup>-</sup>                       | Lipids    | 2183978  | 560878   | 394764  | 635824   | 151688  |
| 959 | (7Z)-Hexadecenoic acid*                       | C <sub>9</sub> H <sub>11</sub> NO <sub>3</sub>                | [M-H] <sup>-</sup>                       | Lipids    | 66171    | 25437    | 38381   | 66580    | 22977   |
| 960 | Ricinoleic acid                               | C <sub>11</sub> H <sub>14</sub> N <sub>2</sub> O <sub>3</sub> | [M-H] <sup>-</sup>                       | Lipids    | 395230   | 102694   | 202213  | 266988   | 86433   |
| 961 | 9,10-Dihydroxy-12,13-epoxyoctadecanoic acid   | C <sub>9</sub> H <sub>11</sub> NO <sub>3</sub>                | [M-H] <sup>-</sup>                       | Lipids    | 312387   | 73894    | 56651   | 68737    | 47616   |
| 962 | Crepenynic acid                               | C <sub>11</sub> H <sub>14</sub> N <sub>2</sub> O <sub>3</sub> | [M-H] <sup>-</sup>                       | Lipids    | 889079   | 645259   | 795699  | 1815427  | 353807  |
| 963 | 9-Oxo-12Z-Octadecenoic acid*                  | C <sub>9</sub> H <sub>11</sub> NO <sub>3</sub>                | [M+H] <sup>+</sup>                       | Lipids    | 2793235  | 554509   | 733194  | 1046756  | 386495  |
| 964 | Oleamide (9-Octadecenamide)<br>Punicic acid   | C <sub>11</sub> H <sub>14</sub> N <sub>2</sub> O <sub>3</sub> | [M+H] <sup>+</sup><br>[M+H] <sup>+</sup> | Lipids    | 104231   | 166582   | 401683  | 211489   | 91626   |
| 965 | (9Z,11E,13Z-octadecatrienoic acid)            | C <sub>9</sub> H <sub>11</sub> NO <sub>3</sub>                |                                          | Lipids    | 30173373 | 12710050 | 8457982 | 13805181 | 3281365 |
| 966 | 9(10)-EpOME;(9R,10S)-(12Z)                    | C <sub>11</sub> H <sub>14</sub> N <sub>2</sub> O <sub>3</sub> | [M-H] <sup>-</sup>                       | Lipids    | 5143610  | 888942   | 556282  | 700602   | 428265  |

|     |                                                          |                                                               |                    |        |          |          |          |          |          |
|-----|----------------------------------------------------------|---------------------------------------------------------------|--------------------|--------|----------|----------|----------|----------|----------|
|     | -9,10-Epoxyoctadecenoic acid                             |                                                               |                    |        |          |          |          |          |          |
| 967 | 15(R)-Hydroxylinoleic Acid*                              | C <sub>9</sub> H <sub>11</sub> NO <sub>3</sub>                | [M+H] <sup>+</sup> | Lipids | 2658237  | 550540   | 711228   | 1030379  | 351423   |
| 968 | Octadeca-11E,13E,15Z-trienoic acid                       | C <sub>11</sub> H <sub>14</sub> N <sub>2</sub> O <sub>3</sub> | [M+H] <sup>+</sup> | Lipids | 31973740 | 35069916 | 36180410 | 35824262 | 37462654 |
| 969 | 9,10,18-Trihydroxystearic acid                           | C <sub>9</sub> H <sub>11</sub> NO <sub>3</sub>                | [M-H] <sup>-</sup> | Lipids | 15840    | 41403    | 44739    | 58763    | 40404    |
| 970 | 9-Hydroxy-12-oxo-10(E),15(Z)-octadecadienoic acid        | C <sub>11</sub> H <sub>14</sub> N <sub>2</sub> O <sub>3</sub> | [M-H] <sup>-</sup> | Lipids | 289001   | 61741    | 42690    | 71669    | 35092    |
| 971 | 12,13-DHOME;<br>(9Z)-12,13-Dihydroxyoctadec-9-enoic acid | C <sub>9</sub> H <sub>11</sub> NO <sub>3</sub>                | [M-H] <sup>-</sup> | Lipids | 155708   | 181879   | 168421   | 184306   | 144396   |
| 972 | Eicosadienoic acid                                       | C <sub>11</sub> H <sub>14</sub> N <sub>2</sub> O <sub>3</sub> | [M-H] <sup>-</sup> | Lipids | 24708216 | 16214336 | 18890163 | 17172712 | 6620497  |
| 973 | 3-Hydroxyoctadecanoic Acid                               | C <sub>9</sub> H <sub>11</sub> NO <sub>3</sub>                | [M-H] <sup>-</sup> | Lipids | 67607    | 50884    | 57275    | 75259    | 50772    |
| 974 | Methyl linolenate                                        | C <sub>11</sub> H <sub>14</sub> N <sub>2</sub> O <sub>3</sub> | [M+H] <sup>+</sup> | Lipids | 2758991  | 977515   | 2479599  | 3811079  | 69959    |
| 975 | 13S-Hydroxy-9Z,11E,15Z-octadecatrienoic acid             | C <sub>9</sub> H <sub>11</sub> NO <sub>3</sub>                | [M-H] <sup>-</sup> | Lipids | 2338445  | 805406   | 600335   | 1130715  | 189665   |
| 976 | 12-Hydroxyoctadecanoic acid                              | C <sub>11</sub> H <sub>14</sub> N <sub>2</sub> O <sub>3</sub> | [M-H] <sup>-</sup> | Lipids | 59413    | 42495    | 29812    | 26234    | 45493    |
| 977 | 12,13-Epoxy-9-Octadecenoic Acid                          | C <sub>9</sub> H <sub>11</sub> NO <sub>3</sub>                | [M-H] <sup>-</sup> | Lipids | 2225408  | 465761   | 291868   | 402831   | 237856   |
| 978 | 9-Hydroxy-12-oxo-15(Z)-octadecenoic acid                 | C <sub>11</sub> H <sub>14</sub> N <sub>2</sub> O <sub>3</sub> | [M-H] <sup>-</sup> | Lipids | 3428805  | 162358   | 140035   | 176201   | 148309   |
| 979 | Palmitaldehyde                                           | C <sub>9</sub> H <sub>11</sub> NO <sub>3</sub>                | [M-H] <sup>-</sup> | Lipids | 46008744 | 52744653 | 50363524 | 54424020 | 54467745 |
| 980 | 13S-Hydroperoxy-9Z,11E-octadecadienoic acid              | C <sub>11</sub> H <sub>14</sub> N <sub>2</sub> O <sub>3</sub> | [M-H] <sup>-</sup> | Lipids | 5285378  | 1291969  | 822806   | 1115174  | 714804   |
| 981 | 13(S)-HODE;13(S)-Hydroxyoctadeca-9Z,11E-dienoic acid*    | C <sub>9</sub> H <sub>11</sub> NO <sub>3</sub>                | [M-H] <sup>-</sup> | Lipids | 18149916 | 9820037  | 6364908  | 10510419 | 2399589  |
| 982 | Hydroperoxylinoleic acid                                 | C <sub>11</sub> H <sub>14</sub> N <sub>2</sub> O <sub>3</sub> | [M-H] <sup>-</sup> | Lipids | 3613552  | 174495   | 132814   | 189591   | 156634   |
| 983 | 9,12,13-Trihydroxy-10,15-octadecadienoic acid            | C <sub>9</sub> H <sub>11</sub> NO <sub>3</sub>                | [M-H] <sup>-</sup> | Lipids | 689679   | 109105   | 92729    | 162818   | 46302    |

|      |                                                                         |                                                               |                    |        |          |          |          |          |          |
|------|-------------------------------------------------------------------------|---------------------------------------------------------------|--------------------|--------|----------|----------|----------|----------|----------|
| 984  | Hydroxy ricinoleic acid                                                 | C <sub>11</sub> H <sub>14</sub> N <sub>2</sub> O <sub>3</sub> | [M-H]-             | Lipids | 5494271  | 395381   | 278057   | 366672   | 322948   |
| 985  | 9,16-Dihydroxypalmitic acid                                             | C <sub>9</sub> H <sub>11</sub> NO <sub>3</sub>                | [M-H]-             | Lipids | 998131   | 2269233  | 1879301  | 2445489  | 2229508  |
| 986  | 5S,8R-DiHODE;<br>(5S,8R,9Z,12Z)-5,8-Dihydroxy<br>octadeca-9,12-dienoate | C <sub>11</sub> H <sub>14</sub> N <sub>2</sub> O <sub>3</sub> | [M-H]-             | Lipids | 2566789  | 71362    | 45736    | 35204    | 35215    |
| 987  | $\alpha$ -Linolenic Acid*                                               | C <sub>9</sub> H <sub>11</sub> NO <sub>3</sub>                | [M-H]-             | Lipids | 42914263 | 33777205 | 43972933 | 41929568 | 19241020 |
| 988  | 1-Octadecanol                                                           | C <sub>11</sub> H <sub>14</sub> N <sub>2</sub> O <sub>3</sub> | [M-H]-             | Lipids | 40767    | 39754    | 39245    | 39708    | 40870    |
| 989  | Palmitoleic Acid*<br>13-KODE;                                           | C <sub>9</sub> H <sub>11</sub> NO <sub>3</sub>                | [M-H]-             | Lipids | 153825   | 86758    | 98186    | 133031   | 77709    |
| 990  | (9Z,11E)-13-Oxo-octadeca-9,11<br>-dienoic acid*                         | C <sub>11</sub> H <sub>14</sub> N <sub>2</sub> O <sub>3</sub> | [M-H]-             | Lipids | 1011178  | 117769   | 61950    | 90546    | 41945    |
| 991  | $\gamma$ -Linolenic Acid*                                               | C <sub>9</sub> H <sub>11</sub> NO <sub>3</sub>                | [M-H]-             | Lipids | 47028651 | 35392292 | 50574292 | 57705634 | 20243273 |
| 992  | Undecylic Acid<br>7S,8S-DiHODE;                                         | C <sub>11</sub> H <sub>14</sub> N <sub>2</sub> O <sub>3</sub> | [M-H]-             | Lipids | 508920   | 896389   | 630573   | 717551   | 764610   |
| 993  | (9Z,12Z)-(7S,8S)-Dihydroxyoc<br>tadeca-9,12-dienoic acid*               | C <sub>9</sub> H <sub>11</sub> NO <sub>3</sub>                | [M-H]-             | Lipids | 233383   | 231943   | 209893   | 280647   | 262514   |
| 994  | Dibutyl sebacate                                                        | C <sub>11</sub> H <sub>14</sub> N <sub>2</sub> O <sub>3</sub> | [M+H] <sup>+</sup> | Lipids | 19681    | 12589    | 11431    | 17183    | 8736     |
| 995  | 1-Eicosanol                                                             | C <sub>9</sub> H <sub>11</sub> NO <sub>3</sub>                | [M-H]-             | Lipids | 383312   | 103801   | 193806   | 252117   | 87174    |
| 996  | alpha-Hydroxylinoleic acid                                              | C <sub>11</sub> H <sub>14</sub> N <sub>2</sub> O <sub>3</sub> | [M-H]-             | Lipids | 18043020 | 9319752  | 6316310  | 10323691 | 2254827  |
| 997  | 2R-Hydroxyoctadecanoic<br>Acid*                                         | C <sub>9</sub> H <sub>11</sub> NO <sub>3</sub>                | [M-H]-             | Lipids | 12883416 | 2388183  | 2516790  | 3143243  | 3035510  |
| 998  | (9Z,11E)-Octadecadienoic<br>acid*                                       | C <sub>11</sub> H <sub>14</sub> N <sub>2</sub> O <sub>3</sub> | [M-H]-             | Lipids | 303054   | 256262   | 259142   | 340223   | 148431   |
| 999  | Linoleic acid*                                                          | C <sub>9</sub> H <sub>11</sub> NO <sub>3</sub>                | [M-H]-             | Lipids | 303054   | 256262   | 259142   | 340223   | 148431   |
| 1000 | 9-Hydroxy-10,12,15-octadecat<br>rienoic acid*                           | C <sub>11</sub> H <sub>14</sub> N <sub>2</sub> O <sub>3</sub> | [M-H]-             | Lipids | 947883   | 111144   | 60773    | 90045    | 41920    |
| 1001 | Pentadecanoic Acid                                                      | C <sub>9</sub> H <sub>11</sub> NO <sub>3</sub>                | [M-H]-             | Lipids | 15454616 | 12157821 | 14810174 | 17076330 | 7080331  |
| 1002 | 9,10,11-Trihydroxy-12-octadec                                           | C <sub>11</sub> H <sub>14</sub> N <sub>2</sub> O <sub>3</sub> | [M-H]-             | Lipids | 700158   | 160570   | 145677   | 198719   | 111013   |

|      |                                                          |                                                               |        |        |          |          |          |          |          |
|------|----------------------------------------------------------|---------------------------------------------------------------|--------|--------|----------|----------|----------|----------|----------|
|      | enoic acid                                               |                                                               |        |        |          |          |          |          |          |
| 1003 | DL-2-hydroxystearic acid*                                | C <sub>9</sub> H <sub>11</sub> NO <sub>3</sub>                | [M-H]- | Lipids | 13142382 | 2969181  | 2795804  | 3404858  | 3015789  |
| 1004 | 9-Hydroperoxy-10E,12,15Z-oc<br>tadecatrienoic acid       | C <sub>11</sub> H <sub>14</sub> N <sub>2</sub> O <sub>3</sub> | [M-H]- | Lipids | 531728   | 216714   | 195427   | 385073   | 63266    |
| 1005 | Hexadecanedioic acid                                     | C <sub>9</sub> H <sub>11</sub> NO <sub>3</sub>                | [M-H]- | Lipids | 241025   | 191840   | 170850   | 189766   | 216389   |
| 1006 | 9-Hydroxy-13-oxo-10-octadec<br>enoic Acid                | C <sub>11</sub> H <sub>14</sub> N <sub>2</sub> O <sub>3</sub> | [M-H]- | Lipids | 1044922  | 381813   | 361930   | 494588   | 248786   |
| 1007 | 13-Hydroperoxy-9Z,11E-octad<br>ecadienoic acid*          | C <sub>9</sub> H <sub>11</sub> NO <sub>3</sub>                | [M-H]- | Lipids | 292907   | 77924    | 54549    | 89564    | 20462    |
| 1008 | 9S-Hydroxy-10E,12Z-octadeca<br>dienoic acid*             | C <sub>11</sub> H <sub>14</sub> N <sub>2</sub> O <sub>3</sub> | [M-H]- | Lipids | 18501345 | 9777353  | 6448379  | 10959500 | 2360562  |
| 1009 | 17-Hydroxylinolenic acid                                 | C <sub>9</sub> H <sub>11</sub> NO <sub>3</sub>                | [M-H]- | Lipids | 5565524  | 2065899  | 1519987  | 2614876  | 825136   |
| 1010 | 13-methylmyristic acid                                   | C <sub>11</sub> H <sub>14</sub> N <sub>2</sub> O <sub>3</sub> | [M-H]- | Lipids | 438592   | 286638   | 352836   | 506486   | 342288   |
| 1011 | 2R-hydroxy-9Z,12Z,15Z-octad<br>ecatrienoic acid          | C <sub>9</sub> H <sub>11</sub> NO <sub>3</sub>                | [M-H]- | Lipids | 1388665  | 652998   | 285323   | 877816   | 179079   |
| 1012 | 13(s)-hydroperoxy-(9z,11e,15z<br>)-octadecatrienoic acid | C <sub>11</sub> H <sub>14</sub> N <sub>2</sub> O <sub>3</sub> | [M-H]- | Lipids | 1447284  | 955924   | 891067   | 913270   | 414525   |
| 1013 | 9,10,13-Trihydroxy-11-Octade<br>cenoic Acid              | C <sub>9</sub> H <sub>11</sub> NO <sub>3</sub>                | [M-H]- | Lipids | 5904261  | 1644962  | 1281892  | 1808278  | 1020157  |
| 1014 | Tridecanedioic acid<br>9,10-DHOME;                       | C <sub>11</sub> H <sub>14</sub> N <sub>2</sub> O <sub>3</sub> | [M-H]- | Lipids | 133952   | 142986   | 120861   | 128254   | 166648   |
| 1015 | (12Z)-9,10-Dihydroxyoctadec-<br>12-enoic acid            | C <sub>9</sub> H <sub>11</sub> NO <sub>3</sub>                | [M-H]- | Lipids | 30300    | 1874     | 6885     | 9535     | 9        |
| 1016 | 11-Octadecanoic<br>acid(Vaccenic acid)*                  | C <sub>11</sub> H <sub>14</sub> N <sub>2</sub> O <sub>3</sub> | [M-H]- | Lipids | 62203053 | 52072690 | 55531449 | 67648637 | 28591159 |
| 1017 | 1,14-Tetradecanedioic Acid                               | C <sub>9</sub> H <sub>11</sub> NO <sub>3</sub>                | [M-H]- | Lipids | 33876    | 41485    | 38355    | 43933    | 45149    |
| 1018 | Cis-4,7,10,13,16,19-Docosahe<br>xaenoic Acid             | C <sub>11</sub> H <sub>14</sub> N <sub>2</sub> O <sub>3</sub> | [M-H]- | Lipids | 9801     | 8297     | 9762     | 12781    | 6019     |

|      |                                                  |                                                               |                    |               |          |          |          |          |          |
|------|--------------------------------------------------|---------------------------------------------------------------|--------------------|---------------|----------|----------|----------|----------|----------|
| 1019 | Heptadecanoic acid                               | C <sub>9</sub> H <sub>11</sub> NO <sub>3</sub>                | [M-H]-             | Lipids        | 902629   | 584131   | 726096   | 711171   | 656888   |
| 1020 | Dodecanoic acid (Lauric acid)                    | C <sub>11</sub> H <sub>14</sub> N <sub>2</sub> O <sub>3</sub> | [M-H]-             | Lipids        | 140679   | 135853   | 154771   | 174468   | 101238   |
| 1021 | Elaidic Acid                                     | C <sub>9</sub> H <sub>11</sub> NO <sub>3</sub>                | [M-H]-             | Lipids        | 61117010 | 51474096 | 55235026 | 67556542 | 27273848 |
| 1022 | Petroselinic acid*                               | C <sub>11</sub> H <sub>14</sub> N <sub>2</sub> O <sub>3</sub> | [M-H]-             | Lipids        | 61117010 | 51474096 | 55235026 | 67556542 | 27273848 |
| 1023 | 1-Monomyristin                                   | C <sub>9</sub> H <sub>11</sub> NO <sub>3</sub>                | [M+H] <sup>+</sup> | Lipids        | 503991   | 330793   | 224345   | 237180   | 296390   |
| 1024 | Undecanedioic acid                               | C <sub>11</sub> H <sub>14</sub> N <sub>2</sub> O <sub>3</sub> | [M-H]-             | Lipids        | 528209   | 350901   | 270759   | 427284   | 269896   |
| 1025 | Tridecanoic Acid                                 | C <sub>9</sub> H <sub>11</sub> NO <sub>3</sub>                | [M-H]-             | Lipids        | 8109     | 8280     | 8688     | 10258    | 5121     |
| 1026 | 3-Hydroxy-palmitic acid<br>methyl ester          | C <sub>11</sub> H <sub>14</sub> N <sub>2</sub> O <sub>3</sub> | [M-H]-             | Lipids        | 1878729  | 474612   | 408045   | 580676   | 384625   |
| 1027 | Dodecanedioic acid                               | C <sub>9</sub> H <sub>11</sub> NO <sub>3</sub>                | [M-H]-             | Lipids        | 3646     | 4483     | 5049     | 4560     | 4993     |
| 1028 | Cis-10-Pentadecenoic<br>Acid(C15:1)              | C <sub>11</sub> H <sub>14</sub> N <sub>2</sub> O <sub>3</sub> | [M-H]-             | Lipids        | 741053   | 898654   | 897064   | 976870   | 1352643  |
| 1029 | Stearic Acid                                     | C <sub>9</sub> H <sub>11</sub> NO <sub>3</sub>                | [M-H]-             | Lipids        | 2454340  | 3389474  | 2945055  | 3013322  | 3547743  |
| 1030 | Palmitic acid                                    | C <sub>11</sub> H <sub>14</sub> N <sub>2</sub> O <sub>3</sub> | [M-H]-             | Lipids        | 138996   | 138218   | 166897   | 184158   | 129577   |
| 1031 | 16-Methylheptadecanoic acid                      | C <sub>9</sub> H <sub>11</sub> NO <sub>3</sub>                | [M-H]-             | Lipids        | 2141296  | 1795851  | 2901793  | 3053407  | 3495758  |
| 1032 | N-(2-Hydroxyethyl)eicosapent<br>aenoic acid      | C <sub>11</sub> H <sub>14</sub> N <sub>2</sub> O <sub>3</sub> | [M+H] <sup>+</sup> | Lipids        | 19012    | 7981     | 8740     | 8858     | 17869    |
| 1033 | 10,16-Dihydroxypalmitic acid                     | C <sub>9</sub> H <sub>11</sub> NO <sub>3</sub>                | [M-H]-             | Lipids        | 38970    | 80401    | 65148    | 77552    | 68685    |
| 1034 | 4-Oxo-9Z,11Z,13E,15E-Octad<br>ecatetraenoic Acid | C <sub>11</sub> H <sub>14</sub> N <sub>2</sub> O <sub>3</sub> | [M+H] <sup>+</sup> | Lipids        | 33256    | 9618     | 5343     | 9        | 9        |
| 1035 | Docosanoic acid (Behenic<br>acid)                | C <sub>9</sub> H <sub>11</sub> NO <sub>3</sub>                | [M-H]-             | Lipids        | 57428    | 59090    | 47048    | 47284    | 26178    |
| 1036 | Arachidonic Acid                                 | C <sub>11</sub> H <sub>14</sub> N <sub>2</sub> O <sub>3</sub> | [M-H]-             | Lipids        | 50116    | 19340    | 18861    | 22342    | 25011    |
| 1037 | 10-Undecenoic acid                               | C <sub>9</sub> H <sub>11</sub> NO <sub>3</sub>                | [M-H]-             | Lipids        | 26414    | 25458    | 22052    | 29036    | 25456    |
| 1038 | Arachidic acid                                   | C <sub>11</sub> H <sub>14</sub> N <sub>2</sub> O <sub>3</sub> | [M-H]-             | Lipids        | 5860806  | 8691944  | 5776959  | 5100281  | 4441356  |
| 1039 | 13-Hydroxy-9Z,11E-octadecad<br>ienoic acid       | C <sub>9</sub> H <sub>11</sub> NO <sub>3</sub>                | [M+H] <sup>+</sup> | Lipids        | 4879     | 1978     | 17878    | 27068    | 9        |
| 1040 | Dibutyl phthalate                                | C <sub>11</sub> H <sub>14</sub> N <sub>2</sub> O <sub>3</sub> | [M+H] <sup>+</sup> | Organic acids | 24541876 | 26760353 | 27369190 | 26562642 | 27983012 |



|      |                                     |                                                               |                    |               |               |          |          |               |          |
|------|-------------------------------------|---------------------------------------------------------------|--------------------|---------------|---------------|----------|----------|---------------|----------|
| 1041 | 6-Aminocaproic acid                 | C <sub>9</sub> H <sub>11</sub> NO <sub>3</sub>                | [M+H] <sup>+</sup> | Organic acids | 1115538       | 709347   | 697520   | 1186685       | 494959   |
| 1042 | 2-Aminoisobutyric acid*             | C <sub>11</sub> H <sub>14</sub> N <sub>2</sub> O <sub>3</sub> | [M+H] <sup>+</sup> | Organic acids | 3314180       | 2580579  | 1610561  | 1968365       | 1188642  |
| 1043 | Methylmalonic acid*                 | C <sub>9</sub> H <sub>11</sub> NO <sub>3</sub>                | [M-H] <sup>-</sup> | Organic acids | 62652744      | 9645805  | 42085408 | 57612252      | 10153761 |
| 1044 | L-Malic acid*                       | C <sub>11</sub> H <sub>14</sub> N <sub>2</sub> O <sub>3</sub> | [M-H] <sup>-</sup> | Organic acids | 3580105       | 4705866  | 3541145  | 3809937       | 4504682  |
| 1045 | γ-Aminobutyric acid                 | C <sub>9</sub> H <sub>11</sub> NO <sub>3</sub>                | [M+H] <sup>+</sup> | Organic acids | 16531498      | 9613042  | 9270526  | 12356928      | 4191699  |
| 1046 | Citric Acid                         | C <sub>11</sub> H <sub>14</sub> N <sub>2</sub> O <sub>3</sub> | [M-H] <sup>-</sup> | Organic acids | 13479873<br>4 | 66658123 | 92942285 | 10380168<br>7 | 96922529 |
| 1047 | Methanesulfonic acid                | C <sub>9</sub> H <sub>11</sub> NO <sub>3</sub>                | [M-H] <sup>-</sup> | Organic acids | 309441        | 265482   | 232132   | 194677        | 196375   |
| 1048 | 2-Hydroxyethylphosphonic acid       | C <sub>11</sub> H <sub>14</sub> N <sub>2</sub> O <sub>3</sub> | [M-H] <sup>-</sup> | Organic acids | 947463        | 9        | 175280   | 159690        | 9        |
| 1049 | 2,3-Dihydroxy-3-Methylbutanoic Acid | C <sub>9</sub> H <sub>11</sub> NO <sub>3</sub>                | [M-H] <sup>-</sup> | Organic acids | 46731490      | 73981609 | 55007277 | 57362247      | 73544470 |
| 1050 | Trans-Citridic acid                 | C <sub>11</sub> H <sub>14</sub> N <sub>2</sub> O <sub>3</sub> | [M+H] <sup>+</sup> | Organic acids | 1339594       | 2125095  | 1996785  | 1821548       | 1839757  |
| 1051 | 2-Methylglutaric acid*              | C <sub>9</sub> H <sub>11</sub> NO <sub>3</sub>                | [M-H] <sup>-</sup> | Organic acids | 539203        | 472067   | 581161   | 723872        | 355969   |
| 1052 | Adipic Acid*                        | C <sub>11</sub> H <sub>14</sub> N <sub>2</sub> O <sub>3</sub> | [M-H] <sup>-</sup> | Organic acids | 539203        | 472067   | 581161   | 723872        | 355969   |
| 1053 | 4-Acetamidobutyric acid             | C <sub>9</sub> H <sub>11</sub> NO <sub>3</sub>                | [M+H] <sup>+</sup> | Organic acids | 10673912      | 930349   | 1134768  | 2112412       | 1266515  |
| 1054 | 2-Hydroxyisobutyric acid*           | C <sub>11</sub> H <sub>14</sub> N <sub>2</sub> O <sub>3</sub> | [M-H] <sup>-</sup> | Organic acids | 1047692       | 71446    | 148317   | 166540        | 35998    |
| 1055 | 2-Hydroxybutyric Acid*              | C <sub>9</sub> H <sub>11</sub> NO <sub>3</sub>                | [M-H] <sup>-</sup> | Organic acids | 1047692       | 71446    | 148317   | 166540        | 35998    |
| 1056 | L-Pipecolic Acid                    | C <sub>11</sub> H <sub>14</sub> N <sub>2</sub> O <sub>3</sub> | [M+H] <sup>+</sup> | Organic acids | 794758        | 1026139  | 1906934  | 2274192       | 1707594  |
| 1057 | Dihydrojasmonic acid                | C <sub>9</sub> H <sub>11</sub> NO <sub>3</sub>                | [M-H] <sup>-</sup> | Organic acids | 53224         | 33887    | 48670    | 54758         | 44661    |
| 1058 | Aminomalonic acid                   | C <sub>11</sub> H <sub>14</sub> N <sub>2</sub> O <sub>3</sub> | [M-H] <sup>-</sup> | Organic acids | 1372629       | 230320   | 1575294  | 1749026       | 275366   |
| 1059 | Triethyl citrate                    | C <sub>9</sub> H <sub>11</sub> NO <sub>3</sub>                | [M+H] <sup>+</sup> | Organic acids | 159475        | 194605   | 191711   | 155795        | 168391   |
| 1060 | 5-Acetamidopentanoic Acid           | C <sub>11</sub> H <sub>14</sub> N <sub>2</sub> O <sub>3</sub> | [M-H] <sup>-</sup> | Organic acids | 110455        | 109725   | 100654   | 137138        | 106447   |
| 1061 | 2,6-Diaminooimelic acid             | C <sub>9</sub> H <sub>11</sub> NO <sub>3</sub>                | [M+H] <sup>+</sup> | Organic acids | 3041489       | 496880   | 805943   | 705904        | 189762   |
| 1062 | Shikimic acid                       | C <sub>11</sub> H <sub>14</sub> N <sub>2</sub> O <sub>3</sub> | [M-H] <sup>-</sup> | Organic acids | 1603234       | 3642180  | 3425927  | 2374018       | 2869662  |
| 1063 | Methylenesuccinic acid              | C <sub>9</sub> H <sub>11</sub> NO <sub>3</sub>                | [M-H] <sup>-</sup> | Organic acids | 105332        | 97896    | 112213   | 107726        | 75079    |
| 1064 | Oxalic acid                         | C <sub>11</sub> H <sub>14</sub> N <sub>2</sub> O <sub>3</sub> | [M-H] <sup>-</sup> | Organic acids | 121280        | 93773    | 1013275  | 1179547       | 50695    |
| 1065 | 1-Pyrroline-4-hydroxy-2-carbo       | C <sub>9</sub> H <sub>11</sub> NO <sub>3</sub>                | [M-H] <sup>-</sup> | Organic acids | 146610        | 262137   | 361359   | 512675        | 735707   |

|      |                                       |                                                               |                    |               |         |         |         |         |         |
|------|---------------------------------------|---------------------------------------------------------------|--------------------|---------------|---------|---------|---------|---------|---------|
|      | xylic acid                            |                                                               |                    |               |         |         |         |         |         |
| 1066 | 2-Acetyl-2-Hydroxybutanoic Acid       | C <sub>11</sub> H <sub>14</sub> N <sub>2</sub> O <sub>3</sub> | [M-H]-             | Organic acids | 55228   | 35458   | 38901   | 60290   | 33980   |
| 1067 | Fumaric acid*                         | C <sub>9</sub> H <sub>11</sub> NO <sub>3</sub>                | [M-H]-             | Organic acids | 1525083 | 990512  | 1549171 | 2228471 | 918273  |
| 1068 | Maleic acid*                          | C <sub>11</sub> H <sub>14</sub> N <sub>2</sub> O <sub>3</sub> | [M-H]-             | Organic acids | 1525083 | 990512  | 1549171 | 2228471 | 918273  |
| 1069 | 2-Hydroxyhexadecanoic acid            | C <sub>9</sub> H <sub>11</sub> NO <sub>3</sub>                | [M-H]-             | Organic acids | 3674619 | 1816018 | 1483966 | 1876019 | 1807384 |
| 1070 | 2-Picolinic acid*                     | C <sub>11</sub> H <sub>14</sub> N <sub>2</sub> O <sub>3</sub> | [M-H]-             | Organic acids | 1139385 | 334511  | 216170  | 215511  | 210423  |
| 1071 | 4-Guanidinobutyric acid               | C <sub>9</sub> H <sub>11</sub> NO <sub>3</sub>                | [M+H] <sup>+</sup> | Organic acids | 1891782 | 1141347 | 1525641 | 2517039 | 1194699 |
| 1072 | Hydroxypyruvic acid*                  | C <sub>11</sub> H <sub>14</sub> N <sub>2</sub> O <sub>3</sub> | [M-H]-             | Organic acids | 1175371 | 965046  | 721137  | 864052  | 809065  |
| 1073 | L-Lactic Acid                         | C <sub>9</sub> H <sub>11</sub> NO <sub>3</sub>                | [M-H]-             | Organic acids | 11857   | 12838   | 89543   | 107809  | 13212   |
| 1074 | 2-Phosphoglycolate                    | C <sub>11</sub> H <sub>14</sub> N <sub>2</sub> O <sub>3</sub> | [M-H]-             | Organic acids | 36713   | 29262   | 34740   | 40013   | 38395   |
| 1075 | Malonic acid                          | C <sub>9</sub> H <sub>11</sub> NO <sub>3</sub>                | [M-H]-             | Organic acids | 8992150 | 8717363 | 6466860 | 6031589 | 6516898 |
| 1076 | Abscisic acid                         | C <sub>11</sub> H <sub>14</sub> N <sub>2</sub> O <sub>3</sub> | [M-H]-             | Organic acids | 67990   | 110545  | 55287   | 66698   | 62833   |
| 1077 | Tranexamic Acid                       | C <sub>9</sub> H <sub>11</sub> NO <sub>3</sub>                | [M+H] <sup>+</sup> | Organic acids | 47214   | 32487   | 55714   | 67454   | 40728   |
| 1078 | 3-Hydroxybutyric acid                 | C <sub>11</sub> H <sub>14</sub> N <sub>2</sub> O <sub>3</sub> | [M-H]-             | Organic acids | 7355477 | 6888187 | 5219210 | 5605477 | 5327856 |
| 1079 | Succinic anhydride                    | C <sub>9</sub> H <sub>11</sub> NO <sub>3</sub>                | [M+H] <sup>+</sup> | Organic acids | 653162  | 176063  | 617501  | 586977  | 143442  |
| 1080 | Tartronate semialdehyde*              | C <sub>11</sub> H <sub>14</sub> N <sub>2</sub> O <sub>3</sub> | [M-H]-             | Organic acids | 826889  | 660741  | 611256  | 701017  | 562018  |
| 1081 | L-Tartaric acid                       | C <sub>9</sub> H <sub>11</sub> NO <sub>3</sub>                | [M-H]-             | Organic acids | 285591  | 186900  | 191928  | 184976  | 217734  |
| 1082 | 2-Furoic acid                         | C <sub>11</sub> H <sub>14</sub> N <sub>2</sub> O <sub>3</sub> | [M-H]-             | Organic acids | 317334  | 1613437 | 1883678 | 1559697 | 3967425 |
| 1083 | DL-Glyceric Acid                      | C <sub>9</sub> H <sub>11</sub> NO <sub>3</sub>                | [M-H]-             | Organic acids | 1194703 | 383698  | 339245  | 447017  | 769091  |
| 1084 | cis-Citral                            | C <sub>11</sub> H <sub>14</sub> N <sub>2</sub> O <sub>3</sub> | [M+H] <sup>+</sup> | Organic acids | 76551   | 94846   | 93832   | 110146  | 102491  |
| 1085 | 2,4-Dichlorophenoxyacetic Acid        | C <sub>9</sub> H <sub>11</sub> NO <sub>3</sub>                | [M-H]-             | Organic acids | 15591   | 14174   | 12405   | 16843   | 16408   |
| 1086 | 1-Aminocyclopropane-1-carboxylic acid | C <sub>11</sub> H <sub>14</sub> N <sub>2</sub> O <sub>3</sub> | [M+H] <sup>+</sup> | Organic acids | 236428  | 213425  | 213033  | 191023  | 100888  |
| 1087 | Glutaric acid*                        | C <sub>9</sub> H <sub>11</sub> NO <sub>3</sub>                | [M-H]-             | Organic acids | 1230067 | 267449  | 289453  | 443401  | 315826  |
| 1088 | α-Ketoglutaric acid                   | C <sub>11</sub> H <sub>14</sub> N <sub>2</sub> O <sub>3</sub> | [M-H]-             | Organic acids | 90867   | 663906  | 458758  | 573354  | 293457  |
| 1089 | β-Hydroxyisovaleric acid              | C <sub>9</sub> H <sub>11</sub> NO <sub>3</sub>                | [M-H]-             | Organic acids | 1551198 | 562243  | 670307  | 935755  | 683864  |

|      |                                      |                                                               |                    |               |          |          |          |          |          |
|------|--------------------------------------|---------------------------------------------------------------|--------------------|---------------|----------|----------|----------|----------|----------|
| 1090 | Muconic acid                         | C <sub>11</sub> H <sub>14</sub> N <sub>2</sub> O <sub>3</sub> | [M-H]-             | Organic acids | 367464   | 344069   | 274637   | 209960   | 480305   |
| 1091 | Succinic acid*                       | C <sub>9</sub> H <sub>11</sub> NO <sub>3</sub>                | [M-H]-             | Organic acids | 21357314 | 9        | 33456794 | 41555634 | 7743322  |
| 1092 | 2-Methylsuccinic acid*               | C <sub>11</sub> H <sub>14</sub> N <sub>2</sub> O <sub>3</sub> | [M-H]-             | Organic acids | 364749   | 377389   | 347601   | 357334   | 626066   |
| 1093 | 2-Benzylsuccinic Acid                | C <sub>9</sub> H <sub>11</sub> NO <sub>3</sub>                | [M-H]-             | Organic acids | 16406    | 32462    | 47744    | 29700    | 51143    |
| 1094 | δ-Guanidinovaleric acid              | C <sub>11</sub> H <sub>14</sub> N <sub>2</sub> O <sub>3</sub> | [M+H] <sup>+</sup> | Organic acids | 78035    | 72638    | 67905    | 70603    | 55816    |
| 1095 | 3-Methyl-2-Oxobutanoic acid          | C <sub>9</sub> H <sub>11</sub> NO <sub>3</sub>                | [M-H]-             | Organic acids | 228149   | 203282   | 382918   | 333954   | 207019   |
| 1096 | L-Citramalic acid                    | C <sub>11</sub> H <sub>14</sub> N <sub>2</sub> O <sub>3</sub> | [M-H]-             | Organic acids | 1249090  | 209243   | 452342   | 661071   | 469764   |
| 1097 | 3-Dehydroshikimic acid               | C <sub>9</sub> H <sub>11</sub> NO <sub>3</sub>                | [M-H]-             | Organic acids | 2155013  | 408547   | 364284   | 378976   | 70823    |
| 1098 | Isocitric Acid                       | C <sub>11</sub> H <sub>14</sub> N <sub>2</sub> O <sub>3</sub> | [M-H]-             | Organic acids | 29329143 | 10988066 | 26875713 | 23350538 | 24607036 |
| 1099 | 6-Hydroxyhexanoic acid               | C <sub>9</sub> H <sub>11</sub> NO <sub>3</sub>                | [M-H]-             | Organic acids | 640762   | 1375842  | 1037786  | 1229801  | 826338   |
| 1100 | Citraconic acid                      | C <sub>11</sub> H <sub>14</sub> N <sub>2</sub> O <sub>3</sub> | [M-H]-             | Organic acids | 2015735  | 157212   | 183057   | 253254   | 773244   |
| 1101 | 1-Methylpiperidine-2-carboxylic acid | C <sub>9</sub> H <sub>11</sub> NO <sub>3</sub>                | [M+H] <sup>+</sup> | Organic acids | 2013311  | 2621039  | 1881054  | 2129292  | 2779190  |
| 1102 | 9-Oxononanoic acid                   | C <sub>11</sub> H <sub>14</sub> N <sub>2</sub> O <sub>3</sub> | [M-H]-             | Organic acids | 50933    | 32401    | 25521    | 36492    | 38993    |
| 1103 | Benzoylformic acid                   | C <sub>9</sub> H <sub>11</sub> NO <sub>3</sub>                | [M-H]-             | Organic acids | 126039   | 112216   | 9        | 167645   | 57010    |
| 1104 | Ethylmalonic acid*                   | C <sub>11</sub> H <sub>14</sub> N <sub>2</sub> O <sub>3</sub> | [M-H]-             | Organic acids | 132249   | 26236    | 35536    | 51060    | 34675    |
| 1105 | 2-Propylglutaric acid                | C <sub>9</sub> H <sub>11</sub> NO <sub>3</sub>                | [M-H]-             | Organic acids | 187112   | 250417   | 279042   | 197897   | 9        |
| 1106 | Succinic semialdehyde                | C <sub>11</sub> H <sub>14</sub> N <sub>2</sub> O <sub>3</sub> | [M-H]-             | Organic acids | 64848    | 89237    | 80705    | 74886    | 87781    |
| 1107 | 2-Hydroxy-4-methylpentanoic acid     | C <sub>9</sub> H <sub>11</sub> NO <sub>3</sub>                | [M-H]-             | Organic acids | 163735   | 53117    | 786783   | 830551   | 60674    |
| 1108 | Mevalonic acid                       | C <sub>11</sub> H <sub>14</sub> N <sub>2</sub> O <sub>3</sub> | [M-H]-             | Organic acids | 427510   | 979684   | 1650372  | 1815049  | 15027658 |
| 1109 | Argininosuccinic acid                | C <sub>9</sub> H <sub>11</sub> NO <sub>3</sub>                | [M-H]-             | Organic acids | 61126    | 20002    | 37122    | 35404    | 19449    |
| 1110 | 3-Ureidopropionic Acid               | C <sub>11</sub> H <sub>14</sub> N <sub>2</sub> O <sub>3</sub> | [M-H]-             | Organic acids | 717592   | 650532   | 1284359  | 1306590  | 736772   |
| 1111 | Azelaic acid                         | C <sub>9</sub> H <sub>11</sub> NO <sub>3</sub>                | [M-H]-             | Organic acids | 14631037 | 12896126 | 10391405 | 13733655 | 9239306  |
| 1112 | Pimelic acid*                        | C <sub>11</sub> H <sub>14</sub> N <sub>2</sub> O <sub>3</sub> | [M-H]-             | Organic acids | 81961    | 49629    | 37497    | 64058    | 35069    |
| 1113 | Quinic Acid                          | C <sub>9</sub> H <sub>11</sub> NO <sub>3</sub>                | [M-H]-             | Organic acids | 11236740 | 3764564  | 9616506  | 7181017  | 9243557  |
| 1114 | 3-Guanidinopropionic acid            | C <sub>11</sub> H <sub>14</sub> N <sub>2</sub> O <sub>3</sub> | [M-H]-             | Organic acids | 323719   | 46329    | 10880    | 56020    | 22256    |
| 1115 | 2-Aminoethanesulfonic acid           | C <sub>9</sub> H <sub>11</sub> NO <sub>3</sub>                | [M-H]-             | Organic acids | 20899    | 9105     | 11977    | 11133    | 9        |

|      |                                               |                                                               |                    |               |         |         |         |         |         |
|------|-----------------------------------------------|---------------------------------------------------------------|--------------------|---------------|---------|---------|---------|---------|---------|
| 1116 | 2-Propylmalic Acid*                           | C <sub>11</sub> H <sub>14</sub> N <sub>2</sub> O <sub>3</sub> | [M-H]-             | Organic acids | 5707814 | 256365  | 1339562 | 2465959 | 203765  |
| 1117 | 3-Isopropylmalic Acid*                        | C <sub>9</sub> H <sub>11</sub> NO <sub>3</sub>                | [M-H]-             | Organic acids | 5707814 | 256365  | 1339562 | 2465959 | 203765  |
| 1118 | 2-Hydroxyisocaproic acid                      | C <sub>11</sub> H <sub>14</sub> N <sub>2</sub> O <sub>3</sub> | [M-H]-             | Organic acids | 1067270 | 432900  | 5096360 | 5305469 | 474289  |
| 1119 | 2-Hydroxyphenylacetic acid                    | C <sub>9</sub> H <sub>11</sub> NO <sub>3</sub>                | [M-H]-             | Organic acids | 1716210 | 67951   | 65779   | 72931   | 49170   |
| 1120 | DL-Glyceraldehyde-3-phosphate                 | C <sub>11</sub> H <sub>14</sub> N <sub>2</sub> O <sub>3</sub> | [M-H]-             | Organic acids | 14120   | 6907    | 49509   | 107351  | 9       |
| 1121 | 3-Hydroxyglutaric acid*                       | C <sub>9</sub> H <sub>11</sub> NO <sub>3</sub>                | [M-H]-             | Organic acids | 479748  | 264057  | 259428  | 323475  | 285657  |
| 1122 | Iminodiacetic acid*                           | C <sub>11</sub> H <sub>14</sub> N <sub>2</sub> O <sub>3</sub> | [M-H]-             | Organic acids | 4601672 | 892450  | 1210329 | 1480197 | 823980  |
| 1123 | Suberic Acid                                  | C <sub>9</sub> H <sub>11</sub> NO <sub>3</sub>                | [M-H]-             | Organic acids | 237289  | 310844  | 243718  | 287099  | 192144  |
| 1124 | 2-Isopropylmalic Acid                         | C <sub>11</sub> H <sub>14</sub> N <sub>2</sub> O <sub>3</sub> | [M-H]-             | Organic acids | 5493951 | 274243  | 1250169 | 2406190 | 200311  |
| 1125 | 4-Oxopentanoic Acid                           | C <sub>9</sub> H <sub>11</sub> NO <sub>3</sub>                | [M-H]-             | Organic acids | 17916   | 25208   | 40400   | 41198   | 23381   |
| 1126 | 2-Propylsuccinic acid*                        | C <sub>11</sub> H <sub>14</sub> N <sub>2</sub> O <sub>3</sub> | [M-H]-             | Organic acids | 80846   | 48073   | 40477   | 59392   | 33872   |
| 1127 | 2-Hydroxy-2-methyl-3-oxobutanoic acid         | C <sub>9</sub> H <sub>11</sub> NO <sub>3</sub>                | [M-H]-             | Organic acids | 53014   | 45444   | 40365   | 67387   | 64225   |
| 1128 | 4,8-Dihydroxyquinoline-2-carboxylic acid      | C <sub>11</sub> H <sub>14</sub> N <sub>2</sub> O <sub>3</sub> | [M-H]-             | Organic acids | 127220  | 79715   | 123307  | 115768  | 85713   |
| 1129 | DL-3-Phenyllactic acid*                       | C <sub>9</sub> H <sub>11</sub> NO <sub>3</sub>                | [M-H]-             | Organic acids | 154493  | 93012   | 734859  | 700400  | 75746   |
| 1130 | Sebacic acid                                  | C <sub>11</sub> H <sub>14</sub> N <sub>2</sub> O <sub>3</sub> | [M-H]-             | Organic acids | 24806   | 5104    | 4879    | 8238    | 4489    |
| 1131 | Pyrrole-2-carboxylic acid                     | C <sub>9</sub> H <sub>11</sub> NO <sub>3</sub>                | [M-H]-             | Organic acids | 25902   | 39048   | 48413   | 39499   | 174500  |
| 1132 | Dimethylmalonic acid*                         | C <sub>11</sub> H <sub>14</sub> N <sub>2</sub> O <sub>3</sub> | [M-H]-             | Organic acids | 53258   | 36060   | 35674   | 41853   | 64348   |
| 1133 | 5-Aminovaleric acid                           | C <sub>9</sub> H <sub>11</sub> NO <sub>3</sub>                | [M+H] <sup>+</sup> | Organic acids | 261904  | 102755  | 83832   | 110805  | 46827   |
| 1134 | Jasmonic acid                                 | C <sub>11</sub> H <sub>14</sub> N <sub>2</sub> O <sub>3</sub> | [M-H]-             | Organic acids | 39483   | 21873   | 26368   | 25497   | 29519   |
| 1135 | 2,2-Dimethylsuccinic acid                     | C <sub>9</sub> H <sub>11</sub> NO <sub>3</sub>                | [M-H]-             | Organic acids | 336581  | 151512  | 169736  | 172176  | 65142   |
| 1136 | D-Lactic Acid                                 | C <sub>11</sub> H <sub>14</sub> N <sub>2</sub> O <sub>3</sub> | [M-H]-             | Organic acids | 29909   | 47503   | 39822   | 31636   | 39038   |
| 1137 | Phenylpyruvic acid                            | C <sub>9</sub> H <sub>11</sub> NO <sub>3</sub>                | [M-H]-             | Organic acids | 43405   | 9       | 48578   | 45769   | 39502   |
| 1138 | Tristin(3,4',5-Trihydroxy-3'-methoxybibenzyl) | C <sub>11</sub> H <sub>14</sub> N <sub>2</sub> O <sub>3</sub> | [M-H]-             | Others        | 163491  | 223030  | 377914  | 238449  | 199641  |
| 1139 | 3,4'-Dihydroxy-5-methoxybibe                  | C <sub>9</sub> H <sub>11</sub> NO <sub>3</sub>                | [M+H] <sup>+</sup> | Others        | 1346679 | 2706914 | 2216514 | 1996244 | 1283071 |

|      |                                                          |                                                               |                     |        |          |          |          |          |          |
|------|----------------------------------------------------------|---------------------------------------------------------------|---------------------|--------|----------|----------|----------|----------|----------|
|      | nzyl                                                     |                                                               |                     |        |          |          |          |          |          |
| 1140 | 4-Hydroxy-3,5,3',5'-tetramethoxybibenzyl                 | C <sub>11</sub> H <sub>14</sub> N <sub>2</sub> O <sub>3</sub> | [M+H] <sup>+</sup>  | Others | 2887762  | 4321308  | 6279432  | 3254787  | 4232506  |
| 1141 | Dendrocandin C                                           | C <sub>9</sub> H <sub>11</sub> NO <sub>3</sub>                | [M-H]-              | Others | 1194238  | 2010728  | 3197473  | 1201164  | 2087967  |
| 1142 | 3-hydroxy-5-methoxybibenzyl                              | C <sub>11</sub> H <sub>14</sub> N <sub>2</sub> O <sub>3</sub> | [M-H]-              | Others | 369956   | 666690   | 481937   | 560548   | 636125   |
| 1143 | Crepidatin                                               | C <sub>9</sub> H <sub>11</sub> NO <sub>3</sub>                | [M+H] <sup>+</sup>  | Others | 987358   | 1534180  | 2288913  | 1042119  | 1465833  |
| 1144 | 4,4'-Dihydroxy-3,5-dimethoxybibenzyl*                    | C <sub>11</sub> H <sub>14</sub> N <sub>2</sub> O <sub>3</sub> | [M+H] <sup>+</sup>  | Others | 3379949  | 2812618  | 3797429  | 1805879  | 2741937  |
| 1145 | 3-hydroxy-5,3'-dimethoxybibenzyl                         | C <sub>9</sub> H <sub>11</sub> NO <sub>3</sub>                | [M-H]-              | Others | 1144204  | 2330063  | 1596103  | 1459701  | 953899   |
| 1146 | 3,4'-dihydroxy-3',5-dimethoxybibenzyl*                   | C <sub>11</sub> H <sub>14</sub> N <sub>2</sub> O <sub>3</sub> | [M+H] <sup>+</sup>  | Others | 2161745  | 1867919  | 2471647  | 1231292  | 1719729  |
| 1147 | Batatasin III*                                           | C <sub>9</sub> H <sub>11</sub> NO <sub>3</sub>                | [M+H] <sup>+</sup>  | Others | 142237   | 213943   | 185366   | 200525   | 192883   |
|      | Dendrocandin A;                                          |                                                               | [M+H] <sup>+</sup>  |        |          |          |          |          |          |
| 1148 | 3,4-Dihydroxy-3',4',5-trimethoxybibenzyl*                | C <sub>11</sub> H <sub>14</sub> N <sub>2</sub> O <sub>3</sub> |                     | Others | 4061098  | 8153360  | 8675945  | 5518564  | 7048759  |
| 1149 | 3'-Hydroxy-3,4,5'-trimethoxybibenzyl*                    | C <sub>9</sub> H <sub>11</sub> NO <sub>3</sub>                | [M+H] <sup>+</sup>  | Others | 7028805  | 13071625 | 12549723 | 10646399 | 8993421  |
| 1150 | 3,4'-dihydroxy-4,5-dimethoxybibenzyl                     | C <sub>11</sub> H <sub>14</sub> N <sub>2</sub> O <sub>3</sub> | [M+H] <sup>+</sup>  | Others | 12546418 | 18300838 | 17705702 | 13849972 | 14219290 |
| 1151 | Batatasin IV*                                            | C <sub>9</sub> H <sub>11</sub> NO <sub>3</sub>                | [M+H] <sup>+</sup>  | Others | 217564   | 376037   | 325736   | 274750   | 240591   |
| 1152 | 3,4-Dihydroxy-5,4'-dimethoxybibenzyl                     | C <sub>11</sub> H <sub>14</sub> N <sub>2</sub> O <sub>3</sub> | [M+H] <sup>+</sup>  | Others | 29980307 | 25918629 | 33235960 | 18281085 | 26710565 |
| 1153 | 3-O-Methylgigantol*                                      | C <sub>9</sub> H <sub>11</sub> NO <sub>3</sub>                | [M+H] <sup>+</sup>  | Others | 7246341  | 11681440 | 12768564 | 10045543 | 8896612  |
| 1154 | Dihydropinosylvin methyl ether                           | C <sub>11</sub> H <sub>14</sub> N <sub>2</sub> O <sub>3</sub> | [M+H] <sup>+</sup>  | Others | 555964   | 838970   | 605801   | 643713   | 845077   |
| 1155 | Moscatilin<br>(4,4'-Dihydroxy-3,3',5-Trimethoxybibenzyl) | C <sub>9</sub> H <sub>11</sub> NO <sub>3</sub>                | [[M+H] <sup>+</sup> | Others | 4087906  | 8472020  | 8245805  | 5871753  | 7279199  |

|      |                                                                          |                                                               |                    |        |         |          |          |          |         |
|------|--------------------------------------------------------------------------|---------------------------------------------------------------|--------------------|--------|---------|----------|----------|----------|---------|
|      | oxybibenzyl)                                                             |                                                               |                    |        |         |          |          |          |         |
| 1156 | 3',4-Dihydroxy-3,5'-dimethoxy<br>bibenzyl*                               | C <sub>11</sub> H <sub>14</sub> N <sub>2</sub> O <sub>3</sub> | [M+H] <sup>+</sup> | Others | 6933076 | 11745526 | 12177950 | 10454748 | 8990897 |
| 1157 | E-3,4,5'-Trihydroxy-3'-glucosy<br>lstilbene                              | C <sub>9</sub> H <sub>11</sub> NO <sub>3</sub>                | [M-H]-             | Others | 58794   | 52617    | 212418   | 185945   | 9       |
| 1158 | chrysotoxine                                                             | C <sub>11</sub> H <sub>14</sub> N <sub>2</sub> O <sub>3</sub> | [M+H] <sup>+</sup> | Others | 751806  | 1147913  | 1656644  | 806878   | 1102876 |
| 1159 | 5-Hydroxy-3,4'-dimethoxybibe<br>nzyI*                                    | C <sub>9</sub> H <sub>11</sub> NO <sub>3</sub>                | [M-H]-             | Others | 1458740 | 2980638  | 2020879  | 1854880  | 1177600 |
| 1160 | 3,3'-Dihydroxy-5-methoxybibe<br>nzyI                                     | C <sub>11</sub> H <sub>14</sub> N <sub>2</sub> O <sub>3</sub> | [M-H]-             | Others | 960790  | 1591173  | 1738628  | 1934631  | 1801314 |
| 1161 | Gigantol(3,3'-Dihydroxy-5,4'-d<br>imethoxybibenzyl)*                     | C <sub>9</sub> H <sub>11</sub> NO <sub>3</sub>                | [M+H] <sup>+</sup> | Others | 6614748 | 12135452 | 11067425 | 9423297  | 8630916 |
| 1162 | Dendrocandin D;<br>3,4,4'-Trihydroxy-5-methoxy-a<br>lpha-ethoxybibenzyl* | C <sub>11</sub> H <sub>14</sub> N <sub>2</sub> O <sub>3</sub> | [M+H] <sup>+</sup> | Others | 4153726 | 8192507  | 8468913  | 5690998  | 7027227 |
| 1163 | 4',5-Dihydroxy-3,3'-dimethoxy<br>bibenzyl*                               | C <sub>9</sub> H <sub>11</sub> NO <sub>3</sub>                | [M+H] <sup>+</sup> | Others | 6388583 | 12104259 | 11370165 | 10551937 | 8496571 |
| 1164 | Dendrocandin F                                                           | C <sub>11</sub> H <sub>14</sub> N <sub>2</sub> O <sub>3</sub> | [M-H]-             | Others | 120884  | 247999   | 98331    | 78651    | 67117   |
| 1165 | 3,3',5-Trihydroxybibenzyl*                                               | C <sub>9</sub> H <sub>11</sub> NO <sub>3</sub>                | [M-H]-             | Others | 1827409 | 3169107  | 2428711  | 2160796  | 2036607 |
| 1166 | 3'-Hydroxy-3,4,5-trimethoxybi<br>benzyl                                  | C <sub>11</sub> H <sub>14</sub> N <sub>2</sub> O <sub>3</sub> | [M+H] <sup>+</sup> | Others | 3585200 | 5055529  | 4265462  | 3013810  | 3363921 |
| 1167 | 4-hydroxy-3,3',5-trimethoxylbi<br>benzyl                                 | C <sub>9</sub> H <sub>11</sub> NO <sub>3</sub>                | [M+H] <sup>+</sup> | Others | 1533736 | 2036788  | 1793832  | 1265942  | 1309168 |
| 1168 | 3,4,4'-Trihydroxy-5-methoxybi<br>benzyl                                  | C <sub>11</sub> H <sub>14</sub> N <sub>2</sub> O <sub>3</sub> | [M-H]-             | Others | 4337219 | 9000787  | 9361111  | 7051415  | 7345211 |
| 1169 | Erianin;<br>3'-Hydroxy-3,4,4',5-tetrametho<br>xybibenzyl                 | C <sub>9</sub> H <sub>11</sub> NO <sub>3</sub>                | [M+H] <sup>+</sup> | Others | 88063   | 158617   | 155873   | 96216    | 110603  |

|      |                                          |                                                               |        |        |         |         |         |         |         |
|------|------------------------------------------|---------------------------------------------------------------|--------|--------|---------|---------|---------|---------|---------|
| 1170 | Resveratrol                              | C <sub>11</sub> H <sub>14</sub> N <sub>2</sub> O <sub>3</sub> | [M-H]- | Others | 186242  | 345813  | 610193  | 448979  | 729318  |
| 1171 | 4'-Hydroxy-3,5-dimethoxybibenzyl*        | C <sub>9</sub> H <sub>11</sub> NO <sub>3</sub>                | [M-H]- | Others | 1652476 | 3369712 | 2271516 | 2022693 | 1399212 |
| 1172 | Dendrocandine B<br>Dendrocandine E;      | C <sub>11</sub> H <sub>14</sub> N <sub>2</sub> O <sub>3</sub> | [M-H]- | Others | 2043276 | 3872869 | 2504617 | 2216735 | 2214110 |
| 1173 | 3,3',4,4'-Tetrahydroxy-5-methoxybibenzyl | C <sub>9</sub> H <sub>11</sub> NO <sub>3</sub>                | [M-H]- | Others | 294538  | 166745  | 408618  | 178538  | 362675  |
| 1174 | Dihydroresveratrol*                      | C <sub>11</sub> H <sub>14</sub> N <sub>2</sub> O <sub>3</sub> | [M-H]- | Others | 2077249 | 3682332 | 2798389 | 2372121 | 2313591 |
| 1175 | 3,4'-Dihydroxy-5-methoxystilbene         | C <sub>9</sub> H <sub>11</sub> NO <sub>3</sub>                | [M-H]- | Others | 1041691 | 1347787 | 1184034 | 1234321 | 589794  |
| 1176 | Nobilin A                                | C <sub>11</sub> H <sub>14</sub> N <sub>2</sub> O <sub>3</sub> | [M-H]- | Others | 3143853 | 7175878 | 6011652 | 5034472 | 2874871 |
| 1177 | Dihydropinosylvin                        | C <sub>9</sub> H <sub>11</sub> NO <sub>3</sub>                | [M-H]- | Others | 123493  | 270248  | 280065  | 208593  | 268395  |
| 1178 | Dendrocandine G                          | C <sub>11</sub> H <sub>14</sub> N <sub>2</sub> O <sub>3</sub> | [M-H]- | Others | 117062  | 249133  | 170854  | 138764  | 71621   |
| 1179 | 4'-Methoxyresveratrol                    | C <sub>9</sub> H <sub>11</sub> NO <sub>3</sub>                | [M-H]- | Others | 1109966 | 1349241 | 1228832 | 1209003 | 612916  |
| 1180 | Trigonopol B                             | C <sub>11</sub> H <sub>14</sub> N <sub>2</sub> O <sub>3</sub> | [M-H]- | Others | 689521  | 1124526 | 952776  | 886526  | 866821  |
| 1181 | Pterostilbene                            | C <sub>9</sub> H <sub>11</sub> NO <sub>3</sub>                | [M-H]- | Others | 16071   | 20257   | 16165   | 13830   | 9667    |
| 1182 | Dendrocandine V                          | C <sub>11</sub> H <sub>14</sub> N <sub>2</sub> O <sub>3</sub> | [M-H]- | Others | 45029   | 123989  | 99859   | 61620   | 90920   |
